# Supplementary material
Source: MDPI journal article supplement (https://www.mdpi.com/1999-4907/12/9/1158)
Supplement: s1 [file s1]

Archive with 10 entries (10 files):
- Figure S1. Bacteria taxa abundance.tif
- Figure S2. Hydrolases enzymes abundance.tif
- Figure S3. Oxidoreductases enzymes abundance.tif
- Figure S4. All enzymes abundance.png
- Supplementary Material S1. Proteomic protocol and detailed bacteria population.pdf
- Table S1. Samples Report for 2018_arenito_3db90_Forests.xlsx
- Table S2. Enzymes Abundance.xlsx
- Table S3. Spearmaní»s Rank correlations.xlsx
- Table S4. Biological processes abundance.xlsx
- Table S5. Peptide list used for functional and taxonomic analysis in Unipept 4.0 and Unipept Desktop.csv
