# Supplementary material
Source: MDPI journal article supplement (https://www.mdpi.com/1999-4907/12/9/1158)
Supplement: s1 [file s1 › Table S1. Samples Report for 2018_arenito_3db90_Forests.xlsx]

## Sheet: in
2018_arenito_3db	Samples report created on 11/05/2018
Experiment: 2018_arenito_3db
Peak List Generator: unknown
Version: unknown
Charge States Calculated: unknown
Deisotoped: unknown
Textual Annotation: unknown
Database Set: 1 Database
Database Name: unknown
Version: unknown
Taxonomy: All Entries
Number of Proteins: 0
Explain Database w/ < 1000 entries:
Does database contain common contaminants?: unknown
Search Engine Set: 1 Search Engine
Search Engine: IdentityE
Version: iaDBs:2.135.2.0
Samples: All Samples
Fragment Tolerance: 0.025 Da (Monoisotopic)
Parent Tolerance: 0.0100 Da (Monoisotopic)
Fixed Modifications: +57 on C (Carbamidomethyl)
Variable Modifications: -1 on (Amidation+C-TERM)	+1 on N (Deamidated)	+16 on M (Oxidation)	+80 on (Phosphoryl+STY)	+98 on STY (Phosphoryl STY)
Database: null (unknown version	0 entries)
Digestion Enzyme: Trypsin
Max Missed Cleavages: 1
Probability Model:
Mudpit_Plate_2018_A21_A1_20180704_A21_R1_F1_b: Peptide Prophet with Delta Mass Correction (No decoys found) [all charge states]
Mudpit_Plate_2018_A21_B1_20180704_A21_R2_F1_b: Peptide Prophet with Delta Mass Correction (No decoys found) [all charge states]
Mudpit_Plate_2018_A21_C1_20180704_A21_R3_F1_b: Peptide Prophet with Delta Mass Correction (No decoys found) [all charge states]
Mudpit_Plate_2018_Felipe_A22_A1_20180704_A22_R1_F1: Peptide Prophet with Delta Mass Correction (No decoys found) [all charge states]
Mudpit_Plate_2018_Felipe_A22_B1_20180704_A22_R2_F1: Peptide Prophet with Delta Mass Correction (No decoys found) [all charge states]
Mudpit_Plate_2018_Felipe_A22_C1_20180704_A22_R3_F1: Peptide Prophet with Delta Mass Correction (No decoys found) [all charge states]
Mudpit_Plate_2018_FelipeA23_A1_20180704_A23_R1_F1b: Peptide Prophet with Delta Mass Correction (No decoys found) [all charge states]
Mudpit_Plate_2018_FelipeA23_B1_20180704_A23_R2_F1b: Peptide Prophet with Delta Mass Correction (No decoys found) [all charge states]
Mudpit_Plate_2018_FelipeA23_C1_20180704_A23_R3_F1b: Peptide Prophet with Delta Mass Correction (No decoys found) [all charge states]
Mudpit_Plate_2018_FelipeA24_A1_20180704_A24_R1_F1b: Peptide Prophet with Delta Mass Correction (No decoys found) [all charge states]
Mudpit_Plate_2018_FelipeA24_B1_20180704_A24_R2_F1b: Peptide Prophet with Delta Mass Correction (No decoys found) [all charge states]
Mudpit_Plate_2018_FelipeA24_C1_20180704_A24_R3_F1b: Peptide Prophet with Delta Mass Correction (No decoys found) [all charge states]
Mudpit_Plate_2018_FelipeA25_A1_20180704_A25_R1_F1: Peptide Prophet with Delta Mass Correction (No decoys found) [all charge states]
Mudpit_Plate_2018_FelipeA25_B1_20180704_A25_R2_F1: Peptide Prophet with Delta Mass Correction (No decoys found) [all charge states]
Mudpit_Plate_2018_FelipeA25_C1_20180704_A25_R3_F1: Peptide Prophet with Delta Mass Correction (No decoys found) [all charge states]
Scaffold: Version: Scaffold_4.6.1
Modification Metadata Set: 1541 modifications
Source: C:\Program Files\Scaffold 4\parameters\unimod.xml
Comment:
Protein Grouping Strategy: Experiment-wide grouping with protein cluster analysis
Peptide Thresholds: 90.0% minimum
Protein Thresholds: 90.0% minimum and 1 peptide minimum
Peptide FDR: 6.6% (Prophet)
Protein FDR: 3.3% (Prophet)
GO Annotation Source(s):
Alternate ID Source(s): FASTA:UniProt/Swiss-Prot (UniProtKB) and FASTA:UniProt/Swiss-Prot (UniProtKB)
2018_arenito_3db Displaying:Quantitative Value (Normalized Total Spectra) Intermediate_12years Intermediate_12years Intermediate_12years Advanced_14years Advanced_14years Advanced_14years Nonrehabilitated Nonrehabilitated Nonrehabilitated Forest Forest Forest Initial_4years Initial_4years Initial_4years
# Visible? Starred? Identified Proteins (627) Accession Number Alternate ID Molecular Weight Protein Grouping Ambiguity Taxonomy Intermediate_12years_R1 Intermediate_12years_R2 Intermediate_12years_R3 Advanced_14years_R1 Advanced_14years_R2 Advanced_14years_R3 Nonrehabilitated_R1 Nonrehabilitated_R2 Nonrehabilitated_R3 Forest_R1 Forest_R2 Forest_R3 Initial_4years Initial_4years_R2 Initial_4years_…
5.1 true Empty Predicted protein OS=Physcomitrella patens subsp. patens GN=PHYPADRAFT_233757 PE=4 SV=1 A9SNZ3_PHYPA PHYPADRAFT_233757 128 kDa true unknown 5	262.5 2	268.1 5	953.6 3	937.7 15048 2	509.2 0.00000 0.00000 0.00000 9	873.3 2	549.3 11538 1	823.0 10440 3	365
5.2 true Empty Uncharacterized protein OS=Amborella trichopoda GN=AMTR_s00017p00234440 PE=4 SV=1 W1PL18_AMBTC AMTR_s00017p00234440 83 kDa true unknown 3	874.1 8	725.7 8	247.3 3	512.0 1	613.7 2	962.7 0.00000 0.00000 0.00000 4	673.7 4	335.7 5	638.3 7	445.3 7	246.0 5	160.7
14 true Empty Hemolysin OS=Serratia marcescens GN=shlA PE=1 SV=1 HLYA_SERMA 165 kDa unknown 12153 24774 6	934.3 819.00 4	913.7 5	277.0 0.00000 1	267.3 0.00000 6	191.3 4	654.7 3	921.0 5	033.7 4	845.0 5	157
5.3 true Empty Predicted protein OS=Physcomitrella patens subsp. patens GN=PHYPADRAFT_78335 PE=4 SV=1 A9SEL4_PHYPA PHYPADRAFT_78335 218 kDa true unknown 8	783.3 9	017.7 6	216.5 6	438.7 0.00000 1	602.0 0.00000 0.00000 0.00000 3	198.7 3	017.6 1	863.5 4	088.0 3	398.6 5	176.3
17 true Empty Cytadherence high molecular weight protein 2 OS=Mycoplasma pneumoniae (strain ATCC 29342 / M129) GN=hmw2 PE=1 SV=1 HMW2_MYCPN 216 kDa true unknown 6	827.3 7	307.3 5	769.0 4	864.0 3	645.0 0.00000 0.00000 0.00000 0.00000 3	109.3 3	721.0 3	940.7 5	115.0 3	376.7 4	85.7
5.4 true Empty Predicted protein OS=Physcomitrella patens subsp. patens GN=PHYPADRAFT_92690 PE=4 SV=1 A9TH37_PHYPA PHYPADRAFT_92690 252 kDa true unknown 6	629.3 6	038.0 5	321.3 0.00000 0.00000 0.00000 0.00000 0.00000 0.00000 4	299.9 3	957.7 3	918.3 7	197.7 4	074.6 2	994.8
19 true Empty Uncharacterized protein OS=Amborella trichopoda GN=AMTR_s00092p00135160 PE=4 SV=1 W1NVH3_AMBTC AMTR_s00092p00135160 119 kDa true unknown 10746 8	604.0 4	354.3 4	199.7 513.00 926.59 0.00000 0.00000 0.00000 8	276.7 6	368.3 627.00 2	704.3 6	567.3 7	364.3
22.1 true Empty Uncharacterized protein OS=Amborella trichopoda GN=AMTR_s00136p00027550 PE=4 SV=1 W1NEU6_AMBTC AMTR_s00136p00027550 146 kDa true unknown 5	648.5 8	992.1 4	055.4 5	126.8 1	375.0 0.00000 0.00000 0.00000 0.00000 4	594.0 1	352.7 3	177.6 5	256.3 3	864.8 18609
28 true Empty Chromosome partition protein Smc OS=Koribacter versatilis (strain Ellin345) GN=smc PE=3 SV=1 SMC_KORVE 145 kDa unknown 9	061.0 8	712.7 2	904.7 1	759.3 0.00000 0.00000 0.00000 0.00000 0.00000 10803 6	911.0 2	999.0 1	014.3 0.00000 3	135
15.1 true Empty Transcription initiation factor TFIID	subunit TAF1 OS=Physcomitrella patens subsp. patens GN=HAF1502 PE=4 SV=1 A9TKZ9_PHYPA HAF1502 255 kDa true unknown 4	710.0 2	689.5 5	510.3 237.88 667.09 2	497.0 0.00000 0.00000 0.00000 2	725.1 3	269.3 5	080.8 2	546.6 5	086.0 5	439
30 true Empty Predicted protein OS=Physcomitrella patens subsp. patens GN=PHYPADRAFT_167456 PE=4 SV=1 A9T0H0_PHYPA PHYPADRAFT_167456 259 kDa true unknown 6	536.7 5	375.7 8	690.0 2	633.5 0.00000 1	726.4 0.00000 0.00000 0.00000 3	246.4 5	020.3 3	988.7 3	810.0 5	509.0 4	799.7
33 true Empty Uncharacterized protein OS=Physcomitrella patens subsp. patens GN=PHYPADRAFT_233718 PE=4 SV=1 A9SNF2_PHYPA PHYPADRAFT_233718 251 kDa true unknown 0.00000 4	831.4 6	961.0 0.00000 671.67 4	595.7 0.00000 0.00000 0.00000 5	276.3 2	828.3 758.67 2	423.1 3	731.6 4	438.6
5.5 true Empty Predicted protein OS=Physcomitrella patens subsp. patens GN=PHYPADRAFT_149955 PE=4 SV=1 A9TSN9_PHYPA PHYPADRAFT_149955 123 kDa true unknown 9	101.7 7	758.3 3	073.9 2	088.3 657.33 0.00000 0.00000 0.00000 0.00000 869.93 1	867.3 4	019.0 5	880.0 3	947.0 1	920.3
36 true Empty Autophagy-related protein 11 OS=Neurospora crassa (strain ATCC 24698 / 74-OR23-1A / CBS 708.71 / DSM 1257 / FGSC 987) GN=apg-8 PE=3 SV=2 ATG11_NEUCR apg-8 162 kDa unknown 9	984.3 20845 15918 6	226.0 3	455.7 2	802.7 0.00000 0.00000 0.00000 4	415.7 2	364.0 3	806.7 3	936.7 3	929.3 0.00000
5.6 true Empty Uncharacterized protein OS=Musa acuminata subsp. malaccensis PE=4 SV=1 M0SFH2_MUSAM 105 kDa true unknown 2	238.3 0.00000 7	012.0 1	075.0 0.00000 1	305.7 0.00000 0.00000 0.00000 3	861.7 2	184.7 2	446.0 4	528.7 890.87 3	176
5.7 true Empty Uncharacterized protein OS=Musa acuminata subsp. malaccensis PE=4 SV=1 M0SG80_MUSAM 47 kDa true unknown 8	001.0 4	923.7 2	220.3 0.00000 0.00000 0.00000 0.00000 0.00000 0.00000 1	794.1 1	849.0 4	177.7 4	484.0 3	614.7 2	401.3
3.1 true Empty DNA-directed RNA polymerase subunit beta OS=Alkalilimnicola ehrlichii (strain ATCC BAA-1101 / DSM 17681 / MLHE-1) GN=rpoB PE=3 SV=1 RPOB_ALKEH 151 kDa true unknown 5	940.9 975.83 1	342.6 785.41 4	121.8 0.00000 0.00000 0.00000 0.00000 4	683.7 4	118.7 1	036.1 2	039.0 3	108.0 3	272.7
5.8 true Empty Uncharacterized protein OS=Amborella trichopoda GN=AMTR_s00010p00266660 PE=4 SV=1 W1NGD9_AMBTC AMTR_s00010p00266660 156 kDa true unknown 3	708.3 4	431.7 7	247.0 3	202.0 0.00000 1	303.0 0.00000 0.00000 0.00000 6	326.3 2	491.3 4	233.3 4	331.3 1	820.7 522.00
2.1 true Empty DNA-directed RNA polymerase subunit beta' OS=Rhodospirillum rubrum (strain ATCC 11170 / ATH 1.1.1 / DSM 467 / LMG 4362 / NCIB 8255 / S1) GN=rpoC PE=3 SV=1 RPOC_RHORT 155 kDa true unknown 106530 96776 2	667.5 2	350.4 0.00000 0.00000 0.00000 0.00000 0.00000 1	828.4 3	598.3 819.05 1	517.5 4	050.2 1	637
43 true Empty Phospholipase D1 OS=Saccharomyces cerevisiae (strain ATCC 204508 / S288c) GN=SPO14 PE=1 SV=3 SPO14_YEAST SPO14 195 kDa true unknown 3	888.7 2	447.7 7	286.0 3	330.7 0.00000 0.00000 0.00000 0.00000 0.00000 3	866.0 0.00000 1	580.3 4	014.7 3	123.7 4	298.7
2.2 true Empty DNA-directed RNA polymerase subunit beta' OS=Bdellovibrio bacteriovorus (strain ATCC 15356 / DSM 50701 / NCIB 9529 / HD100) GN=rpoC PE=3 SV=1 RPOC_BDEBA 152 kDa true unknown 21983 3	705.5 10943 716.48 0.00000 1	738.0 0.00000 0.00000 0.00000 2	848.4 1	964.3 4	692.7 5	239.4 1	640.8 669.90
45 true Empty Autophagy-related protein 11 OS=Magnaporthe oryzae (strain 70-15 / ATCC MYA-4617 / FGSC 8958) GN=ATG11 PE=3 SV=3 ATG11_MAGO7 ATG11 156 kDa true unknown 3	592.3 7	314.6 5	099.3 0.00000 0.00000 0.00000 0.00000 0.00000 0.00000 0.00000 2	223.7 6	048.3 3	033.3 1	606.7 2	947.3
46 true Empty Uncharacterized protein OS=Amborella trichopoda GN=AMTR_s00032p00174160 PE=4 SV=1 U5CY39_AMBTC AMTR_s00032p00174160 127 kDa true unknown 8	169.7 5	300.7 3	428.7 0.00000 0.00000 0.00000 0.00000 0.00000 0.00000 4	378.0 0.00000 0.00000 2	589.7 4	749.7 608.67
2.3 true Empty DNA-directed RNA polymerase subunit beta' OS=Gluconobacter oxydans (strain 621H) GN=rpoC PE=3 SV=1 RPOC_GLUOX 160 kDa true unknown 967.55 87.375 1	384.4 0.00000 0.00000 883.82 0.00000 0.00000 0.00000 0.00000 826.97 1	198.7 4	546.6 1	236.6 0.00000
6.1 true Empty Chromosome partition protein MukB OS=Sodalis glossinidius (strain morsitans) GN=mukB PE=3 SV=1 MUKB_SODGM 169 kDa true unknown 16250 6	224.3 3	961.8 9	074.3 0.00000 1	261.7 0.00000 0.00000 0.00000 4	348.3 3	065.5 7	103.3 4	712.3 3	536.3 3	884.3
48 true Empty Putative histone deacetylase complex	SIN3 component (Fragment) OS=Physcomitrella patens subsp. patens GN=SNT1502 PE=4 SV=1 A9U0L7_PHYPA SNT1502 148 kDa true unknown 4	937.1 1	760.5 7	107.3 812.00 0.00000 0.00000 0.00000 0.00000 0.00000 3	554.0 833.97 1	308.7 4	311.1 6	944.3 2	916
47 true Empty Eukaryotic translation initiation factor 3 subunit A OS=Schizosaccharomyces pombe (strain 972 / ATCC 24843) GN=tif32 PE=1 SV=1 EIF3A_SCHPO tif32 107 kDa true unknown 5	601.0 1	871.7 5	476.7 2	699.0 1	428.0 0.00000 0.00000 0.00000 0.00000 3	129.8 0.00000 0.00000 18181 4	809.3 4	276
1.1 true Empty Predicted protein OS=Physcomitrella patens subsp. patens GN=PHYPADRAFT_101663 PE=4 SV=1 A9U416_PHYPA PHYPADRAFT_101663 182 kDa true unknown 136.60 1	284.9 1	472.5 1	574.0 0.00000 824.85 0.00000 0.00000 0.00000 0.00000 5	588.2 0.00000 1	259.5 879.67 1	364.5
11.1 true Empty Uncharacterized protein OS=Musa acuminata subsp. malaccensis PE=3 SV=1 M0SLT2_MUSAM 226 kDa true unknown 0.00000 8	364.6 3	269.0 627.04 0.00000 808.33 0.00000 0.00000 0.00000 1	423.1 1	231.7 0.00000 2	911.7 7	009.3 31.309
5.9 true Empty Uncharacterized protein OS=Amborella trichopoda GN=AMTR_s00059p00067090 PE=4 SV=1 U5DAR8_AMBTC AMTR_s00059p00067090 55 kDa true unknown 4	952.3 15959 4	751.7 3	048.3 0.00000 0.00000 0.00000 0.00000 0.00000 1	061.6 1	008.4 1	404.5 5	357.7 1	397.7 1	81.8
51 true Empty Spindle pole body component 110 OS=Ashbya gossypii (strain ATCC 10895 / CBS 109.51 / FGSC 9923 / NRRL Y-1056) GN=SPC110 PE=3 SV=1 SP110_ASHGO SPC110 101 kDa true unknown 11593 2	258.0 0.00000 0.00000 0.00000 0.00000 0.00000 0.00000 0.00000 0.00000 0.00000 3	508.7 8	331.3 6	853.0 1	332
52 true Empty Uncharacterized protein OS=Musa acuminata subsp. malaccensis PE=4 SV=1 M0S175_MUSAM 50 kDa true unknown 1	444.7 4	346.0 4	456.2 0.00000 0.00000 0.00000 0.00000 0.00000 0.00000 738.67 2	497.1 0.00000 10690 858.00 2	945.5
53 true Empty Uncharacterized protein OS=Musa acuminata subsp. malaccensis PE=4 SV=1 M0U9Z6_MUSAM 223 kDa true unknown 3	617.6 0.00000 3	747.1 3	496.3 0.00000 0.00000 0.00000 0.00000 0.00000 0.00000 0.00000 0.00000 8	032.0 0.00000 3	941.4
11.2 true Empty Myosin-17 OS=Arabidopsis thaliana GN=XI-K PE=1 SV=2 MYO17_ARATH XI-K 173 kDa true unknown 3	667.0 2	802.3 714.66 0.00000 529.44 0.00000 0.00000 0.00000 0.00000 4	059.6 1	564.1 0.00000 1	429.8 3	324.1 2	383.4
55 true Empty Hemolysin OS=Proteus mirabilis GN=hpmA PE=1 SV=1 HLYA_PROMI 166 kDa unknown 3	949.3 899.00 3	255.0 0.00000 0.00000 0.00000 0.00000 0.00000 0.00000 0.00000 747.67 0.00000 892.33 2	104.3 3	943.3
54 true Empty General negative regulator of transcription subunit 1 OS=Saccharomyces cerevisiae (strain ATCC 204508 / S288c) GN=CDC39 PE=1 SV=3 NOT1_YEAST CDC39 240 kDa true unknown 1	844.3 2	201.3 4	297.7 0.00000 671.67 0.00000 0.00000 0.00000 1	049.0 3	237.7 3	761.7 0.00000 3	827.3 1	273.0 3	562.5
11.3 true Empty Myosin-9 OS=Arabidopsis thaliana GN=XI-C PE=2 SV=1 MYO9_ARATH XI-C 175 kDa true unknown 2	529.9 0.00000 463.35 2	730.3 6	639.9 0.00000 694.00 0.00000 0.00000 823.96 1	669.1 1	661.0 1	584.2 954.60 1	795.1
58 true Empty Uncharacterized protein OS=Amborella trichopoda GN=AMTR_s00059p00074580 PE=4 SV=1 U5D4Z2_AMBTC AMTR_s00059p00074580 201 kDa unknown 0.00000 3	452.0 4	280.7 1	224.3 1	047.3 1	465.7 0.00000 0.00000 0.00000 3	109.3 0.00000 1	176.3 2	253.3 2	970.7 4	91
2.4 true Empty DNA-directed RNA polymerase subunit beta' OS=Sphingopyxis alaskensis (strain DSM 13593 / LMG 18877 / RB2256) GN=rpoC PE=3 SV=1 RPOC_SPHAL 158 kDa true unknown 2	523.2 5	651.3 3	072.7 731.85 0.00000 610.33 0.00000 0.00000 0.00000 2	069.8 2	698.9 1	275.7 2	297.7 3	276.9 2	89
56 true Empty Chromosome partition protein Smc OS=Chlorobium tepidum (strain ATCC 49652 / DSM 12025 / NBRC 103806 / TLS) GN=smc PE=3 SV=1 SMC_CHLTE 134 kDa unknown 1	525.3 9	261.7 0.00000 0.00000 0.00000 0.00000 0.00000 0.00000 0.00000 3	910.3 2	959.3 3	257.0 1	762.3 0.00000 0.00000
57 true Empty Predicted protein OS=Physcomitrella patens subsp. patens GN=PHYPADRAFT_89685 PE=4 SV=1 A9T927_PHYPA PHYPADRAFT_89685 162 kDa true unknown 0.00000 1	738.7 3	778.7 3	945.0 0.00000 0.00000 0.00000 0.00000 0.00000 3	596.7 1	801.0 1	688.3 4	564.0 1	249.3 8	818.7
60 true Empty Uncharacterized protein OS=Amborella trichopoda GN=AMTR_s00065p00171490 PE=4 SV=1 U5CZ71_AMBTC AMTR_s00065p00171490 160 kDa true unknown 5	801.0 5	297.0 5	218.0 0.00000 41702 0.00000 0.00000 0.00000 0.00000 0.00000 698.00 0.00000 0.00000 1	318.0 1	612.7
61 true Empty ATP-dependent helicase/nuclease subunit A OS=Streptococcus pneumoniae serotype 19F (strain G54) GN=addA PE=3 SV=1 ADDA_STRP4 140 kDa true unknown 4	637.3 0.00000 3	606.0 0.00000 4	149.7 0.00000 0.00000 0.00000 0.00000 942.67 1	112.7 0.00000 3	248.4 0.00000 1	179.7
27.1 true Empty DNA-directed RNA polymerase subunit beta OS=Spiroplasma citri GN=rpoB PE=3 SV=1 RPOB_SPICI 147 kDa true unknown 2	149.2 3	684.3 777.26 1	461.7 0.00000 0.00000 0.00000 0.00000 0.00000 2	709.7 757.18 0.00000 1	382.0 1	958.7 0.00000
63 true Empty Uncharacterized protein ECU03_1610 OS=Encephalitozoon cuniculi (strain GB-M1) GN=ECU03_1610 PE=1 SV=1 Y3G1_ENCCU ECU03_1610 18 kDa unknown 0.00000 0.00000 4	054.7 1	816.7 0.00000 1	364.7 0.00000 0.00000 0.00000 0.00000 3	066.3 1	268.7 2	147.3 1	571.0 4	18
64 true Empty Putative DNA helicase INO80 OS=Vanderwaltozyma polyspora (strain ATCC 22028 / DSM 70294) GN=INO80 PE=3 SV=1 INO80_VANPO INO80 180 kDa true unknown 5	442.0 1	629.3 3	070.6 0.00000 0.00000 0.00000 0.00000 694.33 0.00000 4	690.1 1	913.5 0.00000 958.75 2	410.8 4	426
11.4 true Empty Myosin-11 OS=Arabidopsis thaliana GN=XI-E PE=3 SV=1 MYO11_ARATH XI-E 174 kDa true unknown 716.21 0.00000 2	308.5 3	425.5 0.00000 615.68 0.00000 0.00000 0.00000 1	679.5 4	236.6 0.00000 857.14 475.28 9	992.4
65 true Empty DNA-directed RNA polymerase subunit beta' OS=Synechococcus sp. (strain RCC307) GN=rpoC2 PE=3 SV=1 RPOC2_SYNR3 148 kDa true unknown 2	014.4 2	632.8 3	481.0 1	283.7 1	565.0 0.00000 0.00000 0.00000 0.00000 1	079.7 1	011.3 0.00000 0.00000 3	299.0 604.00
6.2 true Empty Chromosome partition protein MukB OS=Yersinia pseudotuberculosis serotype O:1b (strain IP 31758) GN=mukB PE=3 SV=1 MUKB_YERP3 (+7) 170 kDa true unknown 109.07 306.94 2	172.3 6	735.9 1	548.6 0.00000 0.00000 0.00000 0.00000 96.885 5	625.0 0.00000 1	923.8 314.57 1	471.4
2.5 true Empty DNA-directed RNA polymerase subunit beta' OS=Sulfurihydrogenibium sp. (strain YO3AOP1) GN=rpoC PE=3 SV=1 RPOC_SULSY 178 kDa true unknown 73808 1	204.0 1	894.7 1	486.3 859.67 0.00000 0.00000 0.00000 0.00000 45568 1	117.9 0.00000 834.00 2	909.0 70641
4.1 true Empty 60 kDa chaperonin 2 OS=Syntrophobacter fumaroxidans (strain DSM 10017 / MPOB) GN=groL2 PE=3 SV=1 CH602_SYNFM 58 kDa true unknown 167.98 6	763.3 879.98 551.57 0.00000 0.00000 0.00000 0.00000 0.00000 77.802 0.00000 0.00000 2	265.6 0.00000 887.03
4.2 true Empty 60 kDa chaperonin OS=Hyphomonas neptunium (strain ATCC 15444) GN=groL PE=3 SV=1 CH60_HYPNA 58 kDa true unknown 0.00000 0.00000 3	025.2 6	248.8 0.00000 0.00000 0.00000 0.00000 0.00000 599.89 595.32 1	566.5 0.00000 0.00000 0.00000
1.2 true Empty Predicted protein OS=Physcomitrella patens subsp. patens GN=PHYPADRAFT_86852 PE=4 SV=1 A9T1K7_PHYPA PHYPADRAFT_86852 130 kDa true unknown 3	994.1 2	695.9 2	545.2 15.537 0.00000 0.00000 0.00000 0.00000 0.00000 4	146.1 1	128.6 1	033.4 812.79 0.00000 1	336.9
67 true Empty Glycerophosphodiester phosphodiesterase GDE1 OS=Ashbya gossypii (strain ATCC 10895 / CBS 109.51 / FGSC 9923 / NRRL Y-1056) GN=GDE1 PE=3 SV=2 GDE1_ASHGO GDE1 147 kDa unknown 1	298.7 1	946.3 0.00000 0.00000 3	814.7 1	030.0 0.00000 0.00000 0.00000 0.00000 2	772.0 0.00000 635.67 2	536.3 0.00000
5.10 true Empty Uncharacterized protein OS=Musa acuminata subsp. malaccensis PE=4 SV=1 M0SV91_MUSAM 5 kDa true unknown 4	243.0 0.00000 1	378.0 0.00000 717.33 0.00000 0.00000 0.00000 0.00000 2	092.7 2	577.0 719.33 1	972.0 1	260.8 2	905.7
70 true Empty Protein CROWDED NUCLEI 1 OS=Arabidopsis thaliana GN=CRWN1 PE=1 SV=1 CRWN1_ARATH CRWN1 129 kDa true unknown 0.00000 3	361.4 7	778.7 0.00000 912.67 0.00000 0.00000 0.00000 0.00000 1	238.3 1	316.3 0.00000 1	938.3 0.00000 4	805.7
69 true Empty Uncharacterized protein OS=Amborella trichopoda GN=AMTR_s00055p00187070 PE=4 SV=1 U5CYA3_AMBTC AMTR_s00055p00187070 144 kDa unknown 17564 0.00000 0.00000 0.00000 0.00000 0.00000 3	696.7 0.00000 0.00000 733.67 0.00000 0.00000 5	403.3 0.00000 0.00000
29.1 true Empty Eukaryotic translation initiation factor 3 subunit A OS=Physcomitrella patens subsp. patens GN=PHYPADRAFT_113179 PE=3 SV=1 A9RFG7_PHYPA PHYPADRAFT_113179 120 kDa true unknown 4	229.1 672.40 1	211.0 1	487.0 0.00000 1	399.7 0.00000 0.00000 0.00000 4	058.2 1	626.4 1	601.7 1	371.0 0.00000 2	840.5
71 true Empty Uncharacterized protein NMB1333 OS=Neisseria meningitidis serogroup B (strain MC58) GN=NMB1333 PE=1 SV=1 Y1333_NEIMB 66 kDa true unknown 0.00000 656.67 0.00000 5	360.3 0.00000 0.00000 0.00000 0.00000 0.00000 0.00000 4	917.0 4	034.0 0.00000 3	915.3 0.00000
72 true Empty Target of rapamycin complex 2 subunit TSC11 OS=Saccharomyces cerevisiae (strain ATCC 204508 / S288c) GN=TSC11 PE=1 SV=1 TSC11_YEAST TSC11 164 kDa unknown 0.00000 5	571.3 1	168.0 0.00000 0.00000 656.00 0.00000 0.00000 0.00000 2	425.7 0.00000 0.00000 2	241.7 0.00000 0.00000
1.3 true Empty Predicted protein OS=Physcomitrella patens subsp. patens GN=PHYPADRAFT_91833 PE=4 SV=1 A9TEU0_PHYPA PHYPADRAFT_91833 239 kDa true unknown 1	054.5 4	529.2 2	077.4 79.530 2	214.2 0.00000 0.00000 0.00000 0.00000 1	425.5 1	519.4 11.847 10.381 1	846.4 1	187.8
74 true Empty Eukaryotic translation initiation factor 3 subunit A OS=Coccidioides immitis (strain RS) GN=TIF32 PE=3 SV=2 EIF3A_COCIM TIF32 118 kDa true unknown 3	822.3 7	545.2 1	632.0 0.00000 0.00000 0.00000 0.00000 0.00000 0.00000 2	423.0 3	489.9 0.00000 0.00000 2	199.5 1	88
73 true Empty Uncharacterized protein OS=Amborella trichopoda GN=AMTR_s00103p00104550 PE=4 SV=1 W1NZW0_AMBTC AMTR_s00103p00104550 149 kDa unknown 5	670.0 3	699.0 3	821.0 0.00000 0.00000 0.00000 0.00000 0.00000 0.00000 3	787.0 0.00000 1	274.0 0.00000 0.00000 0.00000
1.4 true Empty Predicted protein OS=Physcomitrella patens subsp. patens GN=PHYPADRAFT_70804 PE=4 SV=1 A9RUQ4_PHYPA PHYPADRAFT_70804 136 kDa true unknown 1	221.0 0.00000 5	159.1 7	709.1 8	165.7 0.00000 0.00000 0.00000 1	280.0 1	400.1 3	642.7 0.00000 3	380.7 0.00000 1	129.8
4.3 true Empty 60 kDa chaperonin 3 OS=Bradyrhizobium sp. (strain BTAi1 / ATCC BAA-1182) GN=groL3 PE=3 SV=1 CH603_BRASB 57 kDa true unknown 222.44 735.10 823.47 0.00000 0.00000 0.00000 0.00000 0.00000 0.00000 0.00000 0.00000 0.00000 412.75 0.00000 0.00000
3.2 true Empty DNA-directed RNA polymerase subunit beta OS=Jannaschia sp. (strain CCS1) GN=rpoB PE=3 SV=2 RPOB_JANSC 154 kDa true unknown 4	162.9 6	897.6 2	328.9 76405 0.00000 0.00000 0.00000 0.00000 0.00000 884.35 2	552.7 0.00000 1	249.9 974.00 0.00000
1.5 true Empty Predicted protein OS=Physcomitrella patens subsp. patens GN=PHYPADRAFT_68149 PE=4 SV=1 A9RMN5_PHYPA PHYPADRAFT_68149 114 kDa true unknown 2	785.2 3	793.4 3	450.9 901.39 0.00000 0.00000 0.00000 0.00000 0.00000 0.00000 792.37 0.00000 713.08 1	460.0 2	596.5
75 true Empty DNA-directed RNA polymerase subunit beta' OS=Acholeplasma laidlawii (strain PG-8A) GN=rpoC PE=3 SV=1 RPOC_ACHLI 156 kDa true unknown 1	236.7 3	762.3 1	691.0 2	813.0 0.00000 0.00000 0.00000 0.00000 0.00000 583.33 0.00000 0.00000 0.00000 2	528.0 1	279.3
76 true Empty ISWI chromatin-remodeling complex ATPase ISW1 OS=Saccharomyces cerevisiae (strain ATCC 204508 / S288c) GN=ISW1 PE=1 SV=2 ISW1_YEAST ISW1 131 kDa unknown 0.00000 0.00000 1	048.3 0.00000 3	399.0 0.00000 0.00000 0.00000 0.00000 0.00000 1	711.7 0.00000 0.00000 1	497.7 1	212.7
5.11 true Empty Putative uncharacterized protein OS=Selaginella moellendorffii GN=SELMODRAFT_412188 PE=4 SV=1 D8RKC8_SELML SELMODRAFT_412188 41 kDa true unknown 3	238.4 10411 1	134.8 0.00000 0.00000 0.00000 0.00000 0.00000 0.00000 7	546.8 659.41 0.00000 555.12 1	088.1 861.61
2.6 true Empty DNA-directed RNA polymerase subunit beta' OS=Zymomonas mobilis subsp. mobilis (strain ATCC 31821 / ZM4 / CP4) GN=rpoC PE=3 SV=2 RPOC_ZYMMO 154 kDa true unknown 7	244.0 2	294.7 4	172.9 1	082.9 0.00000 0.00000 0.00000 0.00000 0.00000 3	267.4 1	050.3 0.00000 496.26 0.00000 1	709
8.1 true Empty Predicted protein OS=Physcomitrella patens subsp. patens GN=PHYPADRAFT_98762 PE=4 SV=1 A9TXZ0_PHYPA PHYPADRAFT_98762 153 kDa true unknown 0.00000 6	609.6 183.15 2	693.8 0.00000 741.33 0.00000 0.00000 0.00000 1	227.3 0.00000 0.00000 67.936 0.00000 2	875.6
2.7 true Empty DNA-directed RNA polymerase subunit beta' OS=Alkalilimnicola ehrlichii (strain ATCC BAA-1101 / DSM 17681 / MLHE-1) GN=rpoC PE=3 SV=1 RPOC_ALKEH 157 kDa true unknown 700.87 1	750.6 0.00000 0.00000 0.00000 0.00000 0.00000 0.00000 0.00000 0.00000 3	070.8 0.00000 2	871.7 2	575.8 2	465.5
77 true Empty Histone-lysine N-methyltransferase	H3 lysine-79 specific OS=Ustilago maydis (strain 521 / FGSC 9021) GN=DOT1 PE=3 SV=1 DOT1_USTMA DOT1 85 kDa unknown 2	605.7 4	271.0 0.00000 0.00000 0.00000 0.00000 0.00000 0.00000 0.00000 0.00000 0.00000 0.00000 11225 0.00000 2	806.3
78 true Empty Serine protease EspP OS=Escherichia coli O157:H7 GN=espP PE=1 SV=1 ESPP_ECO57 142 kDa true unknown 758.69 3	267.8 20778 0.00000 0.00000 0.00000 0.00000 0.00000 0.00000 0.00000 992.93 0.00000 1	253.1 0.00000 853.33
32.1 true Empty Chromosome partition protein MukB OS=Pasteurella multocida (strain Pm70) GN=mukB PE=3 SV=1 MUKB_PASMU 171 kDa true unknown 11250 14620 286.77 4	220.3 0.00000 0.00000 0.00000 0.00000 0.00000 1	866.5 2	334.3 0.00000 949.36 0.00000 724.80
1.6 true Empty Predicted protein OS=Physcomitrella patens subsp. patens GN=PHYPADRAFT_94615 PE=4 SV=1 A9TMC3_PHYPA PHYPADRAFT_94615 133 kDa true unknown 1	462.6 2	199.8 919.06 970.35 0.00000 0.00000 0.00000 0.00000 0.00000 0.00000 1	193.1 0.00000 0.00000 816.94 1	491
86 true Empty Histone-lysine N-methyltransferase	H3 lysine-4 specific OS=Neosartorya fumigata (strain ATCC MYA-4609 / Af293 / CBS 101355 / FGSC A1100) GN=set1 PE=3 SV=1 SET1_ASPFU set/01 139 kDa true unknown 4	021.1 2	967.7 0.00000 2	422.3 0.00000 0.00000 0.00000 0.00000 0.00000 0.00000 3	031.2 0.00000 3	727.5 0.00000 2	849.7
82 true Empty Uncharacterized protein OS=Musa acuminata subsp. malaccensis PE=4 SV=1 M0S1Z3_MUSAM 123 kDa true unknown 1	393.3 0.00000 0.00000 0.00000 0.00000 0.00000 0.00000 0.00000 0.00000 0.00000 1	328.0 0.00000 7	415.5 1	741.0 732.67
7.1 true Empty Protein translocase subunit SecA OS=Roseiflexus sp. (strain RS-1) GN=secA PE=3 SV=1 SECA_ROSS1 115 kDa true unknown 0.00000 4	954.0 4	963.7 1	732.7 1	633.3 0.00000 0.00000 0.00000 0.00000 2	358.0 0.00000 0.00000 0.00000 1	118.3 1	409.8
84 true Empty DNA-directed RNA polymerase subunit beta OS=Mycoplasma gallisepticum (strain R(low / passage 15 / clone 2)) GN=rpoB PE=3 SV=2 RPOB_MYCGA 156 kDa true unknown 2	632.7 1	509.3 0.00000 0.00000 0.00000 0.00000 0.00000 0.00000 0.00000 0.00000 1	901.4 2	103.3 0.00000 0.00000 0.00000
85 true Empty Pre-mRNA-processing ATP-dependent RNA helicase PRP5 OS=Candida glabrata (strain ATCC 2001 / CBS 138 / JCM 3761 / NBRC 0622 / NRRL Y-65) GN=PRP5 PE=3 SV=1 PRP5_CANGA PRP5 92 kDa unknown 2	431.3 0.00000 0.00000 1	095.3 0.00000 9	867.0 0.00000 0.00000 0.00000 0.00000 5	818.0 0.00000 0.00000 2	545.7 1	16.7
83 true Empty DNA-directed RNA polymerase subunit beta OS=Tropheryma whipplei (strain Twist) GN=rpoB PE=3 SV=2 RPOB_TROWT 128 kDa true unknown 3	904.7 1	700.9 0.00000 1	241.3 0.00000 0.00000 0.00000 0.00000 0.00000 1	251.9 863.95 5	162.3 1	485.1 1	115.6 0.00000
1.7 true Empty Predicted protein OS=Physcomitrella patens subsp. patens GN=PHYPADRAFT_71786 PE=4 SV=1 A9RXD0_PHYPA PHYPADRAFT_71786 87 kDa true unknown 0.00000 6	700.5 0.00000 27.770 0.00000 0.00000 0.00000 0.00000 0.00000 0.00000 1	188.8 0.00000 4	643.7 3	276.9 83.511
3.3 true Empty DNA-directed RNA polymerase subunit beta OS=Pelobacter propionicus (strain DSM 2379) GN=rpoB PE=3 SV=1 RPOB_PELPD 168 kDa true unknown 0.00000 8	406.3 4	286.5 755.16 0.00000 0.00000 0.00000 0.00000 0.00000 0.00000 0.00000 0.00000 2	204.0 4	483.0 2	521.8
2.8 true Empty DNA-directed RNA polymerase subunit beta' OS=Paracoccus denitrificans (strain Pd 1222) GN=rpoC PE=3 SV=1 RPOC_PARDP 155 kDa true unknown 965.08 6	921.5 0.00000 975.79 0.00000 0.00000 0.00000 0.00000 0.00000 1	460.7 5	087.7 708.33 2	732.0 2	853.8 3	637
66.1 true Empty Elongation factor G	mitochondrial OS=Pyrenophora tritici-repentis (strain Pt-1C-BFP) GN=mef1 PE=3 SV=1 EFGM_PYRTR mef1 89 kDa true unknown 1	992.7 0.00000 2	415.7 998.67 0.00000 0.00000 0.00000 0.00000 0.00000 0.00000 1	407.7 0.00000 3	568.4 0.00000 2	998.8
87 true Empty Negative regulator of sporulation PMD1 OS=Saccharomyces cerevisiae (strain ATCC 204508 / S288c) GN=PMD1 PE=1 SV=1 PMD1_YEAST PMD1 195 kDa unknown 3	133.7 4	296.0 0.00000 1	113.3 0.00000 0.00000 0.00000 0.00000 0.00000 0.00000 1	931.3 0.00000 0.00000 2	410.3 0.00000
4.4 true Empty 60 kDa chaperonin OS=Polynucleobacter necessarius subsp. necessarius (strain STIR1) GN=groL PE=3 SV=1 CH60_POLNS 57 kDa true unknown 19684 0.00000 0.00000 10425 6	214.8 8	315.7 0.00000 0.00000 0.00000 20628 2	229.0 17072 11462 11727 0.00000
88 true Empty Uncharacterized protein OS=Musa acuminata subsp. malaccensis PE=4 SV=1 M0SDI8_MUSAM 65 kDa true unknown 10486 2	998.0 0.00000 0.00000 0.00000 937.33 0.00000 0.00000 0.00000 0.00000 1	232.4 3	676.3 3	049.6 0.00000 1	39.2
90 true Empty Uncharacterized protein OS=Musa acuminata subsp. malaccensis PE=4 SV=1 M0TNC5_MUSAM 123 kDa unknown 0.00000 0.00000 250400 228920 0.00000 5	361.7 0.00000 0.00000 7	226.7 0.00000 40803 1	186.3 97715 0.00000 9	633
3.4 true Empty DNA-directed RNA polymerase subunit beta OS=Magnetospirillum magneticum (strain AMB-1 / ATCC 700264) GN=rpoB PE=3 SV=1 RPOB_MAGSA 154 kDa true unknown 16709 19153 4	661.0 1	077.1 868.00 0.00000 0.00000 0.00000 0.00000 0.00000 1	596.6 14.590 30687 0.00000 2	184
89 true Empty Predicted protein OS=Physcomitrella patens subsp. patens GN=PHYPADRAFT_193248 PE=4 SV=1 A9TAZ0_PHYPA PHYPADRAFT_193248 112 kDa true unknown 1	944.3 4	433.8 0.00000 0.00000 0.00000 0.00000 0.00000 0.00000 0.00000 0.00000 0.00000 0.00000 0.00000 2	941.7 3	111.4
1.8 true Empty Predicted protein OS=Physcomitrella patens subsp. patens GN=PHYPADRAFT_70049 PE=4 SV=1 A9RSP6_PHYPA PHYPADRAFT_70049 115 kDa true unknown 2	024.9 1	011.3 0.00000 1	294.2 0.00000 375.00 0.00000 0.00000 0.00000 0.00000 725.62 0.00000 2	514.0 2	894.8 1	558.5
2.9 true Empty DNA-directed RNA polymerase subunit beta' OS=Roseobacter denitrificans (strain ATCC 33942 / OCh 114) GN=rpoC PE=3 SV=1 RPOC_ROSDO 157 kDa true unknown 4	083.8 667.14 1	833.6 1	024.3 0.00000 0.00000 0.00000 0.00000 0.00000 0.00000 0.00000 0.00000 1	323.4 0.00000 3	905.2
44.1 true Empty DNA-directed RNA polymerase subunit beta OS=Mycoplasma genitalium (strain ATCC 33530 / G-37 / NCTC 10195) GN=rpoB PE=3 SV=1 RPOB_MYCGE 156 kDa true unknown 0.00000 32.726 0.00000 0.00000 0.00000 0.00000 0.00000 0.00000 0.00000 1	397.7 994.00 4	650.0 1	052.4 0.00000 1	88.1
37.1 true Empty Predicted protein OS=Physcomitrella patens subsp. patens GN=PHYPADRAFT_82152 PE=4 SV=1 A9SPE9_PHYPA PHYPADRAFT_82152 92 kDa true unknown 3	391.7 0.00000 0.00000 0.00000 1	454.3 3	081.3 0.00000 0.00000 0.00000 2	253.3 5	164.7 0.00000 0.00000 0.00000 0.00000
93 true Empty Uncharacterized protein OS=Musa acuminata subsp. malaccensis PE=4 SV=1 M0T1K6_MUSAM 56 kDa unknown 4	055.7 0.00000 2	943.3 2	885.0 0.00000 0.00000 0.00000 0.00000 0.00000 0.00000 0.00000 0.00000 0.00000 0.00000 0.00000
91 true Empty Peroxisome biosynthesis protein PAS1 OS=Komagataella pastoris GN=PEX1 PE=3 SV=1 PEX1_PICPA PEX1 127 kDa true unknown 2	656.7 0.00000 0.00000 0.00000 0.00000 0.00000 0.00000 0.00000 0.00000 8	956.7 0.00000 0.00000 11508 0.00000 0.00000
92 true Empty Type III restriction-modification system StyLTI enzyme res OS=Salmonella typhimurium (strain LT2 / SGSC1412 / ATCC 700720) GN=res PE=3 SV=2 T3RE_SALTY 113 kDa unknown 0.00000 0.00000 0.00000 759.33 0.00000 2	748.0 0.00000 0.00000 0.00000 2	844.3 0.00000 0.00000 0.00000 0.00000 1	175.7
4.5 true Empty 60 kDa chaperonin OS=Methylacidiphilum infernorum (isolate V4) GN=groL PE=3 SV=1 CH60_METI4 58 kDa true unknown 0.00000 1	651.7 16381 0.00000 2	198.6 2	636.4 0.00000 0.00000 0.00000 0.00000 1	189.3 0.00000 1	440.0 0.00000 3	445.1
1.9 true Empty Predicted protein OS=Physcomitrella patens subsp. patens GN=PHYPADRAFT_70261 PE=4 SV=1 A9RT96_PHYPA PHYPADRAFT_70261 113 kDa true unknown 824.09 2	939.9 1	590.1 40.378 0.00000 0.00000 0.00000 0.00000 0.00000 1	039.4 0.00000 1	130.0 2	659.8 1	964.9 2	954.6
21.1 true Empty M protein	serotype 5 OS=Streptococcus pyogenes serotype M5 GN=emm5 PE=1 SV=2 M5_STRP5 55 kDa true unknown 3	841.6 0.00000 4	178.7 0.00000 0.00000 0.00000 0.00000 0.00000 0.00000 2	939.7 256.00 3	320.5 1	276.3 0.00000 1	446.6
95 true Empty DNA ligase OS=Acidothermus cellulolyticus (strain ATCC 43068 / 11B) GN=ligA PE=3 SV=1 DNLJ_ACIC1 75 kDa true unknown 752.67 0.00000 2	186.5 1	776.8 0.00000 0.00000 0.00000 0.00000 0.00000 0.00000 0.00000 0.00000 970.80 887.33 0.00000
3.5 true Empty DNA-directed RNA polymerase subunit beta OS=Sphingomonas wittichii (strain RW1 / DSM 6014 / JCM 10273) GN=rpoB PE=3 SV=1 RPOB_SPHWW 161 kDa true unknown 1	064.3 95.657 1	366.7 89.186 0.00000 0.00000 0.00000 0.00000 0.00000 1	438.9 0.00000 1	367.9 2	469.4 1	288.4 0.00000
94 true Empty Putative uncharacterized protein OS=Selaginella moellendorffii GN=SELMODRAFT_438561 PE=4 SV=1 D8QWR5_SELML SELMODRAFT_438561 23 kDa true unknown 1	032.4 0.00000 0.00000 2	221.0 0.00000 0.00000 0.00000 0.00000 0.00000 0.00000 0.00000 0.00000 0.00000 0.00000 0.00000
9.1 true Empty Catalase-peroxidase OS=Cupriavidus metallidurans (strain ATCC 43123 / DSM 2839 / NBRC 102507 / CH34) GN=katG PE=3 SV=1 KATG_CUPMC 79 kDa true unknown 65.982 0.00000 634.52 0.00000 1	317.7 0.00000 0.00000 0.00000 0.00000 3	037.4 1	407.7 0.00000 973.73 702.03 2	268.8
1.10 true Empty Predicted protein OS=Physcomitrella patens subsp. patens GN=PHYPADRAFT_82875 PE=4 SV=1 A9SRH7_PHYPA PHYPADRAFT_82875 69 kDa true unknown 1	687.9 1	495.1 1	677.1 0.00000 0.00000 0.00000 0.00000 0.00000 0.00000 0.00000 17.271 0.00000 6	865.7 0.00000 2	118.7
1.11 true Empty Predicted protein OS=Physcomitrella patens subsp. patens GN=PHYPADRAFT_91049 PE=4 SV=1 A9TCQ2_PHYPA PHYPADRAFT_91049 78 kDa true unknown 4	375.0 0.00000 1	106.2 0.00000 0.00000 0.00000 0.00000 0.00000 0.00000 0.00000 5	583.0 0.00000 97.140 3	467.7 1	531
21.2 true Empty M protein	serotype 6 OS=Streptococcus pyogenes GN=emm6 PE=1 SV=1 M6B_STRPY 53 kDa true unknown 0.00000 1	768.2 1	581.5 0.00000 0.00000 0.00000 0.00000 0.00000 0.00000 0.00000 1	136.7 0.00000 2	528.0 766.33 0.00000
100 true Empty Valine--tRNA ligase OS=Bacillus clausii (strain KSM-K16) GN=valS PE=3 SV=1 SYV_BACSK 102 kDa true unknown 0.00000 3	776.2 0.00000 0.00000 0.00000 0.00000 0.00000 0.00000 0.00000 1	651.9 0.00000 0.00000 1	473.3 0.00000 0.00000
101 true Empty Spindle pole component BBP1 OS=Candida glabrata (strain ATCC 2001 / CBS 138 / JCM 3761 / NBRC 0622 / NRRL Y-65) GN=BBP1 PE=3 SV=1 BBP1_CANGA BBP1 52 kDa unknown 0.00000 0.00000 0.00000 2	558.0 0.00000 0.00000 0.00000 1	623.3 0.00000 4	750.0 0.00000 0.00000 0.00000 0.00000 0.00000
99 true Empty N-terminal acetyltransferase A complex subunit NAT1 OS=Saccharomyces cerevisiae (strain ATCC 204508 / S288c) GN=NAT1 PE=1 SV=2 NAT1_YEAST NAT1 99 kDa unknown 0.00000 0.00000 0.00000 0.00000 0.00000 0.00000 0.00000 0.00000 0.00000 0.00000 0.00000 0.00000 0.00000 0.00000 4	87
5.12 true Empty Putative uncharacterized protein OS=Selaginella moellendorffii GN=SELMODRAFT_444593 PE=4 SV=1 D8SBC9_SELML SELMODRAFT_444593 114 kDa true unknown 0.00000 0.00000 0.00000 0.00000 0.00000 0.00000 0.00000 0.00000 0.00000 0.00000 506.84 1	589.2 1	929.3 0.00000 0.00000
8.2 true Empty Predicted protein OS=Physcomitrella patens subsp. patens GN=PHYPADRAFT_159308 PE=4 SV=1 A9RIR1_PHYPA PHYPADRAFT_159308 201 kDa true unknown 0.00000 2	618.1 0.00000 0.00000 817.67 0.00000 0.00000 0.00000 0.00000 0.00000 0.00000 0.00000 1	102.1 562.00 0.00000
107 true Empty Predicted protein (Fragment) OS=Physcomitrella patens subsp. patens GN=PHYPADRAFT_36811 PE=4 SV=1 A9TUK5_PHYPA PHYPADRAFT_36811 21 kDa true unknown 2	349.0 0.00000 0.00000 0.00000 0.00000 0.00000 0.00000 0.00000 0.00000 5	900.7 894.00 0.00000 0.00000 2	434.3 3	987
40.1 true Empty UvrABC system protein A OS=Haemophilus ducreyi (strain 35000HP / ATCC 700724) GN=uvrA PE=3 SV=1 UVRA_HAEDU 104 kDa true unknown 0.00000 2	611.6 0.00000 0.00000 0.00000 0.00000 0.00000 0.00000 0.00000 1	694.0 0.00000 0.00000 1	735.6 1	844.7 2	126.6
108 true Empty Inositol-1	4	5-trisphosphate 5-phosphatase 2 OS=Schizosaccharomyces pombe (strain 972 / ATCC 24843) GN=syj2 PE=2 SV=1 SYJ2_SCHPO syj2 102 kDa unknown 19346 0.00000 0.00000 0.00000 0.00000 0.00000 0.00000 0.00000 0.00000 1	503.0 3	551.3 0.00000 3	101.3 0.00000 3	405
18.1 true Empty Uncharacterized protein OS=Amborella trichopoda GN=AMTR_s00004p00062410 PE=3 SV=1 W1NDV1_AMBTC AMTR_s00004p00062410 184 kDa true unknown 3	070.7 0.00000 0.00000 0.00000 0.00000 0.00000 0.00000 0.00000 0.00000 0.00000 0.00000 0.00000 0.00000 1	687.5 3	153.1
109 true Empty Phenylalanine ammonia-lyase OS=Ustilago maydis (strain 521 / FGSC 9021) GN=PAL1 PE=3 SV=2 PALY_USTMA PAL1 79 kDa unknown 0.00000 1	462.7 0.00000 0.00000 969.33 2	618.3 0.00000 0.00000 0.00000 0.00000 1	522.0 1	659.3 0.00000 4	664.3 0.00000
106 true Empty Heat shock protein STI1 OS=Saccharomyces cerevisiae (strain ATCC 204508 / S288c) GN=STI1 PE=1 SV=1 STI1_YEAST STI1 66 kDa true unknown 1	671.3 2	829.3 697.67 0.00000 0.00000 0.00000 0.00000 0.00000 0.00000 0.00000 0.00000 0.00000 0.00000 0.00000 1	646.3
2.10 true Empty DNA-directed RNA polymerase subunit beta' OS=Parvibaculum lavamentivorans (strain DS-1 / DSM 13023 / NCIMB 13966) GN=rpoC PE=3 SV=1 RPOC_PARL1 154 kDa true unknown 9	911.1 1	016.0 2	553.7 0.00000 0.00000 0.00000 0.00000 0.00000 0.00000 0.00000 2	921.9 0.00000 2	295.9 0.00000 0.00000
104 true Empty Uncharacterized protein OS=Musa acuminata subsp. malaccensis PE=3 SV=1 M0TSZ2_MUSAM 143 kDa true unknown 60050 0.00000 0.00000 0.00000 0.00000 0.00000 0.00000 0.00000 0.00000 0.00000 765.91 0.00000 0.00000 1	989.7 0.00000
102 true Empty Uncharacterized protein OS=Musa acuminata subsp. malaccensis PE=4 SV=1 M0SSU3_MUSAM 173 kDa true unknown 0.00000 0.00000 1	214.7 0.00000 0.00000 0.00000 0.00000 0.00000 0.00000 3	954.3 0.00000 0.00000 2	017.3 0.00000 0.00000
105 true Empty Translation initiation factor IF-2 OS=Gramella forsetii (strain KT0803) GN=infB PE=3 SV=1 IF2_GRAFK 104 kDa true unknown 0.00000 3	734.1 0.00000 0.00000 0.00000 0.00000 0.00000 0.00000 0.00000 0.00000 534.67 0.00000 679.00 0.00000 0.00000
103 true Empty LPS-assembly protein LptD OS=Nitrosospira multiformis (strain ATCC 25196 / NCIMB 11849) GN=lptD PE=3 SV=1 LPTD_NITMU 103 kDa true unknown 0.00000 1	580.3 0.00000 0.00000 0.00000 0.00000 0.00000 0.00000 0.00000 0.00000 0.00000 0.00000 0.00000 0.00000 42273
115 true Empty 30S ribosomal protein S2 OS=Solibacter usitatus (strain Ellin6076) GN=rpsB PE=3 SV=1 RS2_SOLUE 34 kDa unknown 0.00000 34426 34203 0.00000 0.00000 0.00000 0.00000 7	441.7 6	582.0 0.00000 0.00000 6	876.0 5	224.3 0.00000 0.00000
8.3 true Empty Predicted protein OS=Physcomitrella patens subsp. patens GN=PHYPADRAFT_65909 PE=4 SV=1 A9RGS2_PHYPA PHYPADRAFT_65909 188 kDa true unknown 950.62 2	289.5 0.00000 0.00000 0.00000 0.00000 0.00000 0.00000 0.00000 3	582.3 0.00000 1	976.8 1	292.0 830.33 0.00000
4.6 true Empty 60 kDa chaperonin 1 OS=Mycobacterium ulcerans (strain Agy99) GN=groL1 PE=3 SV=1 CH601_MYCUA 56 kDa true unknown 0.00000 0.00000 1	229.3 1	287.4 0.00000 511.33 0.00000 0.00000 0.00000 2	251.7 0.00000 0.00000 1	695.1 0.00000 0.00000
26.1 true Empty Sterol 3-beta-glucosyltransferase OS=Neosartorya fischeri (strain ATCC 1020 / DSM 3700 / FGSC A1164 / NRRL 181) GN=atg26 PE=3 SV=1 ATG26_NEOFI atg26 159 kDa true unknown 4	106.6 995.28 2	200.0 1	433.6 0.00000 0.00000 0.00000 0.00000 0.00000 0.00000 0.00000 0.00000 1	406.3 1	317.9 348.13
13.1 true Empty Protein translocase subunit SecA OS=Jannaschia sp. (strain CCS1) GN=secA PE=3 SV=1 SECA_JANSC 100 kDa true unknown 5	197.3 0.00000 0.00000 0.00000 0.00000 0.00000 0.00000 0.00000 0.00000 0.00000 1	900.2 0.00000 940.96 724.82 2	370.2
21.3 true Empty Plasminogen-binding group A streptococcal M-like protein PAM (Fragment) OS=Streptococcus pyogenes GN=pam PE=1 SV=1 PAM_STRPY 44 kDa true unknown 0.00000 0.00000 7	720.7 0.00000 0.00000 0.00000 0.00000 0.00000 0.00000 0.00000 0.00000 688.78 1	737.7 0.00000 501.90
118 true Empty Alanine--tRNA ligase OS=Methylococcus capsulatus (strain ATCC 33009 / NCIMB 11132 / Bath) GN=alaS PE=3 SV=1 SYA_METCA 96 kDa true unknown 0.00000 0.00000 0.00000 0.00000 0.00000 0.00000 0.00000 0.00000 0.00000 0.00000 0.00000 710.29 1	823.3 696.33 1	50.7
112 true Empty Predicted protein OS=Physcomitrella patens subsp. patens GN=PHYPADRAFT_89867 PE=4 SV=1 A9T9K2_PHYPA PHYPADRAFT_89867 157 kDa true unknown 6	513.4 3	396.5 0.00000 0.00000 0.00000 0.00000 0.00000 0.00000 0.00000 995.00 0.00000 0.00000 0.00000 1	887.0 0.00000
113 true Empty Predicted protein OS=Physcomitrella patens subsp. patens GN=PHYPADRAFT_233882 PE=4 SV=1 A9SRQ6_PHYPA PHYPADRAFT_233882 23 kDa unknown 0.00000 0.00000 0.00000 0.00000 0.00000 0.00000 0.00000 0.00000 0.00000 0.00000 0.00000 0.00000 1	822.0 903.33 15095
114 true Empty Uncharacterized protein OS=Amborella trichopoda GN=AMTR_s00050p00190920 PE=4 SV=1 W1PSA4_AMBTC AMTR_s00050p00190920 123 kDa unknown 0.00000 5	728.3 0.00000 0.00000 0.00000 0.00000 0.00000 0.00000 1	288.7 0.00000 0.00000 3	927.0 0.00000 0.00000 1	58.7
116 true Empty Predicted protein OS=Physcomitrella patens subsp. patens GN=PHYPADRAFT_153240 PE=4 SV=1 A9TZU7_PHYPA PHYPADRAFT_153240 118 kDa true unknown 0.00000 0.00000 0.00000 0.00000 0.00000 0.00000 0.00000 0.00000 0.00000 0.00000 2	096.7 0.00000 0.00000 0.00000 7	509.3
117 true Empty Sorting nexin MVP1 OS=Cryptococcus neoformans var. neoformans serotype D (strain JEC21 / ATCC MYA-565) GN=MVP1 PE=3 SV=1 MVP1_CRYNJ MVP1 68 kDa unknown 0.00000 4	349.3 0.00000 0.00000 0.00000 0.00000 0.00000 0.00000 0.00000 597.67 0.00000 0.00000 0.00000 0.00000 0.00000
1.12 true Empty Predicted protein OS=Physcomitrella patens subsp. patens GN=PHYPADRAFT_87764 PE=4 SV=1 A9T3Y8_PHYPA PHYPADRAFT_87764 149 kDa true unknown 0.00000 3	783.7 1	402.2 1	124.9 0.00000 0.00000 0.00000 0.00000 0.00000 0.00000 11.515 28.442 0.00000 2	098.2 1	826.9
2.11 true Empty DNA-directed RNA polymerase subunit beta' OS=Caulobacter crescentus (strain ATCC 19089 / CB15) GN=rpoC PE=3 SV=1 RPOC_CAUCR 154 kDa true unknown 4	774.6 1	240.3 53.836 0.00000 0.00000 0.00000 0.00000 0.00000 0.00000 0.00000 834.04 0.00000 0.00000 1	203.3 1	110.3
1.13 true Empty Predicted protein OS=Physcomitrella patens subsp. patens GN=PHYPADRAFT_99391 PE=4 SV=1 A9TZN7_PHYPA PHYPADRAFT_99391 104 kDa true unknown 3	608.7 2	190.6 0.00000 2	623.5 844.33 0.00000 0.00000 0.00000 0.00000 0.00000 0.00000 0.00000 2	297.5 0.00000 1	305.4
1.14 true Empty Predicted protein OS=Physcomitrella patens subsp. patens GN=PHYPADRAFT_94651 PE=4 SV=1 A9TMF8_PHYPA PHYPADRAFT_94651 96 kDa true unknown 1	094.7 0.00000 0.00000 2	471.0 0.00000 0.00000 0.00000 0.00000 0.00000 0.00000 0.00000 0.00000 1	288.5 0.00000 0.00000
123 true Empty Histone-lysine N-methyltransferase	H3 lysine-4 specific OS=Aspergillus oryzae (strain ATCC 42149 / RIB 40) GN=set1 PE=3 SV=1 SET1_ASPOR set/01 138 kDa true unknown 0.00000 6	244.0 0.00000 0.00000 1	368.3 0.00000 0.00000 0.00000 0.00000 0.00000 1	407.8 0.00000 0.00000 3	547.0 2	585
121 true Empty Lon protease homolog	mitochondrial OS=Neurospora crassa (strain ATCC 24698 / 74-OR23-1A / CBS 708.71 / DSM 1257 / FGSC 987) GN=pim1 PE=3 SV=1 LONM_NEUCR pim1 121 kDa true unknown 0.00000 0.00000 7	873.9 4	886.2 0.00000 0.00000 0.00000 0.00000 0.00000 0.00000 3	260.7 883.00 0.00000 0.00000 1	144.3
124 true Empty Transcription elongation factor SPT6 OS=Ashbya gossypii (strain ATCC 10895 / CBS 109.51 / FGSC 9923 / NRRL Y-1056) GN=SPT6 PE=3 SV=2 SPT6_ASHGO SPT6 167 kDa true unknown 2	271.3 0.00000 0.00000 0.00000 0.00000 0.00000 0.00000 0.00000 0.00000 0.00000 1	584.3 844.00 1	722.5 0.00000 2	43.3
119 true Empty Protein BZZ1 OS=Saccharomyces cerevisiae (strain ATCC 204508 / S288c) GN=BZZ1 PE=1 SV=1 BZZ1_YEAST BZZ1 71 kDa unknown 0.00000 795.67 0.00000 0.00000 560.67 0.00000 0.00000 0.00000 0.00000 0.00000 0.00000 0.00000 0.00000 2	188.0 3	69.3
122 true Empty DNA mismatch repair protein MutL OS=Clostridium acetobutylicum (strain ATCC 824 / DSM 792 / JCM 1419 / LMG 5710 / VKM B-1787) GN=mutL PE=3 SV=1 MUTL_CLOAB 71 kDa unknown 0.00000 0.00000 0.00000 0.00000 0.00000 0.00000 0.00000 0.00000 0.00000 0.00000 0.00000 0.00000 6	807.0 2	108.3 0.00000
120 true Empty Predicted protein OS=Physcomitrella patens subsp. patens GN=PHYPADRAFT_171163 PE=4 SV=1 A9TP65_PHYPA PHYPADRAFT_171163 96 kDa unknown 0.00000 0.00000 3	212.0 0.00000 0.00000 0.00000 0.00000 0.00000 0.00000 0.00000 0.00000 2	126.7 0.00000 0.00000 0.00000
4.7 true Empty 60 kDa chaperonin 4 OS=Rhizobium loti (strain MAFF303099) GN=groL4 PE=3 SV=1 CH604_RHILO 57 kDa true unknown 0.00000 0.00000 0.00000 617.73 275.55 0.00000 0.00000 0.00000 0.00000 245.95 1	522.4 0.00000 0.00000 0.00000 0.00000
31.1 true Empty Putative uncharacterized protein OS=Selaginella moellendorffii GN=SELMODRAFT_446402 PE=4 SV=1 D8SR35_SELML SELMODRAFT_446402 150 kDa true unknown 6	740.7 0.00000 8	591.6 0.00000 0.00000 0.00000 0.00000 0.00000 0.00000 0.00000 0.00000 0.00000 0.00000 0.00000 2	637.3
25.1 true Empty Protein translocase subunit SecA OS=Bacteroides fragilis (strain YCH46) GN=secA PE=3 SV=1 SECA_BACFR 126 kDa true unknown 1	288.6 1	790.3 619.03 0.00000 0.00000 0.00000 0.00000 0.00000 0.00000 98.737 0.00000 0.00000 1	013.7 0.00000 29.075
4.8 true Empty 60 kDa chaperonin OS=Clostridium botulinum (strain 657 / Type Ba4) GN=groL PE=3 SV=1 CH60_CLOB6 58 kDa true unknown 0.00000 103020 0.00000 0.00000 51230 0.00000 0.00000 0.00000 0.00000 0.00000 753.04 828.57 679.47 0.00000 0.00000
126 true Empty Crossover junction endonuclease MUS81 OS=Arabidopsis thaliana GN=MUS81 PE=1 SV=1 MUS81_ARATH MUS81 74 kDa unknown 903.33 0.00000 1	719.7 0.00000 0.00000 0.00000 0.00000 0.00000 0.00000 0.00000 2	744.7 0.00000 3	209.7 0.00000 0.00000
129 true Empty Cytosine-specific methyltransferase OS=Amborella trichopoda GN=AMTR_s00017p00254260 PE=3 SV=1 W1PFN6_AMBTC AMTR_s00017p00254260 175 kDa true unknown 5	673.1 0.00000 558.00 0.00000 0.00000 0.00000 0.00000 0.00000 0.00000 0.00000 0.00000 3	628.0 0.00000 1	851.3 0.00000
127 true Empty Uncharacterized protein OS=Musa acuminata subsp. malaccensis PE=4 SV=1 M0RX42_MUSAM 55 kDa true unknown 509.00 0.00000 1	061.7 0.00000 2	484.3 0.00000 0.00000 0.00000 0.00000 0.00000 0.00000 0.00000 0.00000 2	117.7 0.00000
128 true Empty Protein SFI1 OS=Saccharomyces cerevisiae (strain ATCC 204508 / S288c) GN=SFI1 PE=1 SV=1 SFI1_YEAST SFI1 113 kDa unknown 822.00 0.00000 5	197.0 0.00000 0.00000 0.00000 0.00000 0.00000 0.00000 0.00000 0.00000 0.00000 0.00000 0.00000 2	421
4.9 true Empty 60 kDa chaperonin OS=Acidiphilium cryptum (strain JF-5) GN=groL PE=3 SV=1 CH60_ACICJ 58 kDa true unknown 0.00000 2	001.5 17428 0.00000 0.00000 0.00000 0.00000 0.00000 0.00000 13047 769.92 0.00000 0.00000 1	015.9 0.00000
4.10 true Empty 60 kDa chaperonin OS=Solibacter usitatus (strain Ellin6076) GN=groL PE=3 SV=1 CH60_SOLUE 58 kDa true unknown 42471 38434 0.00000 0.00000 0.00000 0.00000 0.00000 0.00000 0.00000 0.00000 542.73 163.87 17263 0.00000 0.00000
131 true Empty Uncharacterized protein OS=Musa acuminata subsp. malaccensis PE=4 SV=1 M0SJQ9_MUSAM 5 kDa true unknown 0.00000 0.00000 730.00 0.00000 0.00000 0.00000 0.00000 0.00000 0.00000 1	710.3 1	410.0 1	189.0 0.00000 0.00000 0.00000
4.11 true Empty 60 kDa chaperonin 2 OS=Methylococcus capsulatus (strain ATCC 33009 / NCIMB 11132 / Bath) GN=groL2 PE=3 SV=1 CH602_METCA 57 kDa true unknown 0.00000 0.00000 1	183.3 0.00000 0.00000 0.00000 0.00000 0.00000 2	222.0 2	973.8 0.00000 157.07 0.00000 0.00000 0.00000
1.15 true Empty Predicted protein OS=Physcomitrella patens subsp. patens GN=PHYPADRAFT_87191 PE=4 SV=1 A9T2F1_PHYPA PHYPADRAFT_87191 128 kDa true unknown 9	856.3 31948 7	051.4 0.00000 0.00000 0.00000 0.00000 0.00000 0.00000 953.31 0.00000 0.00000 5	171.8 0.00000 0.00000
3.6 true Empty DNA-directed RNA polymerase subunit beta OS=Rhodopseudomonas palustris (strain BisB18) GN=rpoB PE=3 SV=1 RPOB_RHOPB 154 kDa true unknown 0.00000 309.29 1	899.5 2	607.3 0.00000 0.00000 0.00000 0.00000 0.00000 58.693 22.260 21.363 1	292.9 1	488.0 1	946.8
4.12 true Empty 60 kDa chaperonin 1 OS=Polaromonas naphthalenivorans (strain CJ2) GN=groL1 PE=3 SV=1 CH601_POLNA 58 kDa true unknown 0.00000 6	491.1 0.00000 0.00000 0.00000 0.00000 0.00000 0.00000 0.00000 0.00000 1	502.8 0.00000 4	455.9 0.00000 1	11.2
1.16 true Empty Uncharacterized protein OS=Physcomitrella patens subsp. patens GN=PHYPADRAFT_64062 PE=4 SV=1 A9RBY0_PHYPA PHYPADRAFT_64062 88 kDa true unknown 880.47 3	058.3 1	266.1 0.00000 0.00000 654.00 0.00000 0.00000 0.00000 0.00000 1	241.2 0.00000 0.00000 0.00000 1	619.1
5.13 true Empty Uncharacterized protein OS=Amborella trichopoda GN=AMTR_s00154p00076410 PE=3 SV=1 W1PIU2_AMBTC AMTR_s00154p00076410 67 kDa true unknown 0.00000 2	913.5 0.00000 0.00000 0.00000 2	147.3 0.00000 0.00000 0.00000 0.00000 0.00000 0.00000 1	061.2 0.00000 0.00000
1.17 true Empty Predicted protein OS=Physcomitrella patens subsp. patens GN=PHYPADRAFT_95685 PE=4 SV=1 A9TQ54_PHYPA PHYPADRAFT_95685 57 kDa true unknown 0.00000 0.00000 0.00000 1	096.1 0.00000 0.00000 0.00000 0.00000 0.00000 0.00000 0.00000 1	382.4 813.93 701.57 3	622.6
1.18 true Empty Predicted protein OS=Physcomitrella patens subsp. patens GN=PHYPADRAFT_90827 PE=4 SV=1 A9TC43_PHYPA PHYPADRAFT_90827 107 kDa true unknown 1	878.7 3	236.7 2	850.5 1	861.2 0.00000 0.00000 0.00000 0.00000 0.00000 3	834.1 0.00000 0.00000 2	195.4 1	091.1 1	276.8
138 true Empty Alanine--tRNA ligase OS=Lactobacillus casei (strain ATCC 334) GN=alaS PE=3 SV=1 SYA_LACC3 97 kDa true unknown 0.00000 0.00000 0.00000 0.00000 0.00000 0.00000 0.00000 0.00000 0.00000 2	283.6 1	085.9 0.00000 0.00000 0.00000 0.00000
133 true Empty Leucine--tRNA ligase OS=Magnetospirillum magneticum (strain AMB-1 / ATCC 700264) GN=leuS PE=3 SV=1 SYL_MAGSA 96 kDa true unknown 1	647.3 0.00000 0.00000 0.00000 0.00000 0.00000 0.00000 0.00000 0.00000 0.00000 0.00000 1	349.7 2	809.0 0.00000 5	947.7
137 true Empty Uncharacterized protein OS=Musa acuminata subsp. malaccensis PE=4 SV=1 M0RYS0_MUSAM 117 kDa true unknown 2	399.7 0.00000 0.00000 2	709.6 0.00000 0.00000 0.00000 0.00000 0.00000 0.00000 931.00 0.00000 0.00000 0.00000 1	687
142 true Empty Nitrate reductase OS=Prunus persica GN=PpNR1 PE=2 SV=1 Q93XS1_PRUPE PpNR1 102 kDa true unknown 0.00000 47589 0.00000 0.00000 0.00000 0.00000 0.00000 0.00000 0.00000 0.00000 0.00000 0.00000 3	404.0 0.00000 0.00000
139 true Empty Polyribonucleotide nucleotidyltransferase OS=Acidobacterium capsulatum (strain ATCC 51196 / DSM 11244 / JCM 7670 / NBRC 15755 / NCIMB 13165 / 161) GN=pnp PE=3 SV=1 PNP_ACIC5 87 kDa unknown 24294 9	854.0 0.00000 0.00000 0.00000 0.00000 0.00000 0.00000 0.00000 0.00000 0.00000 0.00000 0.00000 0.00000 0.00000
140 true Empty Catalase-peroxidase 3 OS=Mycobacterium smegmatis (strain ATCC 700084 / mc(2)155) GN=katG3 PE=3 SV=2 KATG3_MYCS2 82 kDa true unknown 8	424.5 0.00000 2	832.0 0.00000 0.00000 0.00000 0.00000 0.00000 0.00000 0.00000 0.00000 2	834.6 1	835.0 0.00000 0.00000
136 true Empty Putative uncharacterized protein OS=Selaginella moellendorffii GN=SELMODRAFT_415737 PE=4 SV=1 D8RX31_SELML SELMODRAFT_415737 69 kDa true unknown 2	796.3 0.00000 0.00000 0.00000 0.00000 0.00000 0.00000 0.00000 0.00000 0.00000 0.00000 1	293.3 807.00 0.00000 0.00000
130 true Empty Putative uncharacterized protein OS=Selaginella moellendorffii GN=SELMODRAFT_445079 PE=3 SV=1 D8SFE9_SELML SELMODRAFT_445079 145 kDa unknown 0.00000 2	120.0 1	626.0 0.00000 0.00000 0.00000 0.00000 0.00000 0.00000 0.00000 0.00000 0.00000 0.00000 0.00000 2	690.7
132 true Empty Nuclear distribution protein PAC1-1 OS=Postia placenta (strain ATCC 44394 / Madison 698-R) GN=PAC1-1 PE=3 SV=1 LIS11_POSPM PAC1-1 48 kDa unknown 0.00000 0.00000 3	778.0 0.00000 0.00000 0.00000 0.00000 0.00000 0.00000 3	320.3 0.00000 0.00000 0.00000 0.00000 38093
141 true Empty Putative uncharacterized protein OS=Selaginella moellendorffii GN=SELMODRAFT_438240 PE=3 SV=1 D8QV82_SELML SELMODRAFT_438240 114 kDa unknown 0.00000 0.00000 2	122.7 0.00000 0.00000 0.00000 0.00000 0.00000 0.00000 0.00000 0.00000 0.00000 0.00000 1	862.3 4	358.3
134 true Empty Lon protease OS=Uncultured termite group 1 bacterium phylotype Rs-D17 GN=lon PE=3 SV=1 LON_UNCTG 90 kDa unknown 0.00000 0.00000 0.00000 0.00000 0.00000 0.00000 0.00000 0.00000 0.00000 1	447.0 4	185.7 0.00000 0.00000 0.00000 1	131.7
135 true Empty Putative cryptochrome DASH	mitochondrial OS=Neurospora crassa (strain ATCC 24698 / 74-OR23-1A / CBS 708.71 / DSM 1257 / FGSC 987) GN=cry PE=3 SV=1 CRYD_NEUCR cry 81 kDa unknown 0.00000 0.00000 0.00000 0.00000 0.00000 0.00000 0.00000 0.00000 0.00000 0.00000 0.00000 2	876.7 0.00000 0.00000 804.33
4.13 true Empty 60 kDa chaperonin 1 OS=Rhodopseudomonas palustris (strain BisB5) GN=groL1 PE=3 SV=1 CH601_RHOPS 58 kDa true unknown 0.00000 915.89 0.00000 0.00000 0.00000 0.00000 0.00000 0.00000 0.00000 533.55 0.00000 903.04 0.00000 0.00000 0.00000
1.19 true Empty Predicted protein OS=Physcomitrella patens subsp. patens GN=PHYPADRAFT_98817 PE=4 SV=1 A9TY44_PHYPA PHYPADRAFT_98817 82 kDa true unknown 2	158.2 3	835.1 0.00000 0.00000 0.00000 0.00000 0.00000 0.00000 0.00000 7	981.7 16.320 17.349 0.00000 808.18 0.00000
154 true Empty Putative uncharacterized protein OS=Selaginella moellendorffii GN=SELMODRAFT_440718 PE=4 SV=1 D8RDW9_SELML SELMODRAFT_440718 20 kDa unknown 1	570.0 843.33 2	277.3 0.00000 0.00000 0.00000 0.00000 0.00000 0.00000 707.00 0.00000 0.00000 0.00000 2	033.7 0.00000
1.20 true Empty Predicted protein OS=Physcomitrella patens subsp. patens GN=PHYPADRAFT_89705 PE=4 SV=1 A9T945_PHYPA PHYPADRAFT_89705 102 kDa true unknown 1	431.1 939.07 0.00000 0.00000 0.00000 0.00000 0.00000 0.00000 0.00000 0.00000 0.00000 0.00000 27269 0.00000 0.00000
4.14 true Empty 60 kDa chaperonin OS=Rhodothermus marinus GN=groL PE=3 SV=1 CH60_RHOMR 58 kDa true unknown 621.92 0.00000 603.91 0.00000 0.00000 0.00000 0.00000 0.00000 0.00000 2	682.9 0.00000 0.00000 1	009.7 2	413.5 0.00000
7.2 true Empty Protein translocase subunit SecA OS=Haemophilus ducreyi (strain 35000HP / ATCC 700724) GN=secA PE=3 SV=1 SECA_HAEDU 103 kDa true unknown 0.00000 0.00000 1	974.0 0.00000 803.62 0.00000 0.00000 0.00000 0.00000 0.00000 1	830.3 0.00000 1	269.6 0.00000 0.00000
1.21 true Empty Predicted protein OS=Physcomitrella patens subsp. patens GN=PHYPADRAFT_87436 PE=4 SV=1 A9T329_PHYPA PHYPADRAFT_87436 118 kDa true unknown 0.00000 23448 0.00000 0.00000 0.00000 0.00000 0.00000 0.00000 0.00000 1	935.4 0.00000 0.00000 1	333.9 1	144.7 1	795.8
39.1 true Empty Putative uncharacterized protein OS=Selaginella moellendorffii GN=SELMODRAFT_411714 PE=4 SV=1 D8RIT4_SELML SELMODRAFT_411714 160 kDa true unknown 0.00000 0.00000 0.00000 0.00000 0.00000 0.00000 0.00000 0.00000 0.00000 0.00000 0.00000 0.00000 0.00000 2	469.2 5	494.3
153 true Empty ATPase synthesis protein 25	mitochondrial OS=Coccidioides posadasii (strain C735) GN=ATP25 PE=3 SV=1 ATP25_COCP7 ATP25 81 kDa unknown 0.00000 0.00000 800.33 2	058.7 0.00000 0.00000 0.00000 0.00000 0.00000 0.00000 0.00000 0.00000 0.00000 0.00000 2	497.3
97.1 true Empty Uncharacterized protein OS=Musa acuminata subsp. malaccensis PE=4 SV=1 M0TPL8_MUSAM 59 kDa true unknown 0.00000 0.00000 0.00000 0.00000 0.00000 0.00000 0.00000 0.00000 0.00000 2	999.3 1	525.8 0.00000 0.00000 0.00000 0.00000
148 true Empty Predicted protein OS=Physcomitrella patens subsp. patens GN=PHYPADRAFT_167193 PE=4 SV=1 A9SYV0_PHYPA PHYPADRAFT_167193 222 kDa true unknown 0.00000 0.00000 2	658.7 0.00000 0.00000 0.00000 0.00000 0.00000 0.00000 0.00000 0.00000 388.67 0.00000 0.00000 5	131.3
150 true Empty Pre-mRNA-splicing factor cdc5 OS=Schizosaccharomyces pombe (strain 972 / ATCC 24843) GN=cdc5 PE=1 SV=1 CEF1_SCHPO cdc5 87 kDa unknown 0.00000 339.00 0.00000 17278 0.00000 790.33 0.00000 0.00000 0.00000 0.00000 0.00000 0.00000 0.00000 0.00000 0.00000
156 true Empty Putative uncharacterized protein OS=Selaginella moellendorffii GN=SELMODRAFT_438230 PE=4 SV=1 D8QV63_SELML SELMODRAFT_438230 63 kDa unknown 0.00000 0.00000 3	683.7 0.00000 0.00000 0.00000 0.00000 0.00000 0.00000 0.00000 0.00000 0.00000 2	731.7 0.00000 0.00000
152 true Empty Myb-like DNA-binding protein BAS1 OS=Saccharomyces cerevisiae (strain ATCC 204508 / S288c) GN=BAS1 PE=1 SV=1 BAS1_YEAST BAS1 90 kDa unknown 3	641.0 0.00000 0.00000 913.33 0.00000 0.00000 0.00000 0.00000 0.00000 0.00000 0.00000 0.00000 5	257.3 0.00000 0.00000
155 true Empty Peptide chain release factor 1 OS=Hamiltonella defensa subsp. Acyrthosiphon pisum (strain 5AT) GN=prfA PE=3 SV=1 RF1_HAMD5 41 kDa true unknown 2	601.3 932.00 3	530.2 0.00000 0.00000 0.00000 0.00000 0.00000 0.00000 0.00000 0.00000 0.00000 0.00000 0.00000 2	327.2
151 true Empty Uncharacterized protein OS=Amborella trichopoda GN=AMTR_s00057p00136560 PE=4 SV=1 U5D8Y5_AMBTC AMTR_s00057p00136560 123 kDa unknown 0.00000 0.00000 0.00000 0.00000 0.00000 0.00000 0.00000 0.00000 0.00000 0.00000 3	249.3 0.00000 1	047.3 0.00000 0.00000
157 true Empty Uncharacterized protein OS=Amborella trichopoda GN=AMTR_s00029p00196710 PE=4 SV=1 W1PI18_AMBTC AMTR_s00029p00196710 162 kDa true unknown 0.00000 0.00000 0.00000 0.00000 0.00000 0.00000 0.00000 0.00000 0.00000 0.00000 1	706.0 0.00000 0.00000 0.00000 1	887
147 true Empty Pre-mRNA-splicing factor SYF1 OS=Magnaporthe oryzae (strain 70-15 / ATCC MYA-4617 / FGSC 8958) GN=SYF1 PE=3 SV=2 SYF1_MAGO7 SYF1 96 kDa unknown 0.00000 0.00000 802.33 2	024.7 0.00000 0.00000 0.00000 0.00000 0.00000 0.00000 0.00000 2	308.0 0.00000 0.00000 962.67
149 true Empty Uncharacterized protein OS=Musa acuminata subsp. malaccensis PE=4 SV=1 M0TJ98_MUSAM 155 kDa unknown 0.00000 1	707.7 0.00000 0.00000 0.00000 0.00000 0.00000 0.00000 0.00000 3	050.3 0.00000 0.00000 0.00000 0.00000 0.00000
158 true Empty Protein transport protein SEC31 OS=Debaryomyces hansenii (strain ATCC 36239 / CBS 767 / JCM 1990 / NBRC 0083 / IGC 2968) GN=SEC31 PE=3 SV=2 SEC31_DEBHA SEC31 136 kDa true unknown 6	599.0 0.00000 0.00000 0.00000 0.00000 0.00000 759.00 0.00000 0.00000 0.00000 0.00000 0.00000 0.00000 602.55 0.00000
12.1 true Empty Actin OS=Scherffelia dubia PE=2 SV=1 ACT_SCHDU 42 kDa true unknown 36905 0.00000 0.00000 0.00000 0.00000 0.00000 0.00000 0.00000 0.00000 0.00000 0.00000 0.00000 0.00000 0.00000 0.00000
24.1 true Empty 50S ribosomal protein L7/L12 OS=Rhodopseudomonas palustris (strain BisB18) GN=rplL PE=3 SV=1 RL7_RHOPB (+4) 13 kDa true unknown 25743 0.00000 24809 0.00000 17343 14851 0.00000 0.00000 0.00000 0.00000 0.00000 17850 18401 0.00000 0.00000
1.22 true Empty Predicted protein OS=Physcomitrella patens subsp. patens GN=PHYPADRAFT_86061 PE=4 SV=1 A9SZE0_PHYPA PHYPADRAFT_86061 72 kDa true unknown 0.00000 0.00000 0.00000 4	232.0 0.00000 0.00000 0.00000 0.00000 0.00000 737.56 916.09 0.00000 1	911.9 1	761.9 1	162.3
4.15 true Empty 60 kDa chaperonin 1 OS=Nitrobacter winogradskyi (strain Nb-255 / ATCC 25391) GN=groL1 PE=3 SV=1 CH601_NITWN 58 kDa true unknown 287.81 0.00000 0.00000 0.00000 0.00000 2	813.6 2	083.6 0.00000 0.00000 652.79 0.00000 0.00000 0.00000 0.00000 1	40.5
3.7 true Empty DNA-directed RNA polymerase subunit beta OS=Rhizobium leguminosarum bv. viciae (strain 3841) GN=rpoB PE=3 SV=1 RPOB_RHIL3 153 kDa true unknown 0.00000 153.16 0.00000 0.00000 0.00000 0.00000 0.00000 0.00000 0.00000 0.00000 12.004 16.431 659.81 1	624.4 0.00000
41.1 true Empty Vacuolar protein sorting/targeting protein 10 OS=Pyrenophora tritici-repentis (strain Pt-1C-BFP) GN=vps10 PE=3 SV=1 VPS10_PYRTR vps10 168 kDa true unknown 1	873.1 34255 0.00000 1	947.1 0.00000 0.00000 0.00000 0.00000 0.00000 952.84 0.00000 1	861.8 0.00000 630.34 2	606.9
1.23 true Empty Predicted protein OS=Physcomitrella patens subsp. patens GN=PHYPADRAFT_94045 PE=4 SV=1 A9TKS0_PHYPA PHYPADRAFT_94045 45 kDa true unknown 914.00 2	753.8 3	329.7 848.86 1	185.3 0.00000 0.00000 0.00000 0.00000 0.00000 0.00000 0.00000 0.00000 1	482.0 0.00000
1.24 true Empty Predicted protein OS=Physcomitrella patens subsp. patens GN=PHYPADRAFT_81394 PE=4 SV=1 A9SMH1_PHYPA PHYPADRAFT_81394 84 kDa true unknown 0.00000 806.41 84.594 1	137.6 0.00000 0.00000 0.00000 0.00000 0.00000 1	597.3 0.00000 0.00000 0.00000 0.00000 0.00000
12.2 true Empty Actin OS=Encephalitozoon cuniculi (strain GB-M1) GN=ECU01_0460 PE=1 SV=2 ACT_ENCCU ECU01_0460 42 kDa true unknown 39579 0.00000 11576 0.00000 0.00000 2	448.5 0.00000 0.00000 0.00000 0.00000 0.00000 35293 0.00000 6	513.0 0.00000
168 true Empty 2-isopropylmalate synthase OS=Oligotropha carboxidovorans (strain ATCC 49405 / DSM 1227 / OM5) GN=leuA PE=3 SV=1 LEU1_OLICO 56 kDa unknown 0.00000 0.00000 0.00000 0.00000 0.00000 1	003.0 0.00000 0.00000 0.00000 0.00000 0.00000 1	358.3 0.00000 0.00000 0.00000
166 true Empty Probable nucleolar pre-ribosomal-associated protein 2 OS=Schizosaccharomyces pombe (strain 972 / ATCC 24843) GN=urb2 PE=3 SV=2 URB2_SCHPO urb2 152 kDa unknown 0.00000 0.00000 0.00000 0.00000 2	490.0 0.00000 0.00000 0.00000 0.00000 0.00000 770.67 2	512.3 0.00000 0.00000 1	400
165 true Empty DNA polymerase III subunit alpha OS=Mycobacterium bovis (strain ATCC BAA-935 / AF2122/97) GN=dnaE PE=3 SV=1 DPO3A_MYCBO (+2) 129 kDa unknown 0.00000 0.00000 0.00000 0.00000 0.00000 0.00000 0.00000 0.00000 0.00000 0.00000 0.00000 0.00000 0.00000 1	025.0 3	928.7
164 true Empty DNA ligase OS=Roseiflexus sp. (strain RS-1) GN=ligA PE=3 SV=1 DNLJ_ROSS1 79 kDa true unknown 0.00000 0.00000 0.00000 0.00000 0.00000 0.00000 0.00000 0.00000 0.00000 0.00000 1	985.7 0.00000 0.00000 1	122.7 0.00000
163 true Empty Translation initiation factor IF-2 OS=Synechococcus sp. (strain JA-2-3B'a(2-13)) GN=infB PE=3 SV=1 IF2_SYNJB 113 kDa unknown 0.00000 0.00000 0.00000 0.00000 0.00000 0.00000 0.00000 0.00000 0.00000 16342 0.00000 0.00000 0.00000 0.00000 0.00000
21.4 true Empty M protein	serotype 12 (Fragment) OS=Streptococcus pyogenes GN=emm12 PE=1 SV=1 M12_STRPY 63 kDa true unknown 0.00000 0.00000 3	531.4 0.00000 0.00000 0.00000 0.00000 0.00000 0.00000 1	238.3 0.00000 1	407.7 0.00000 0.00000 0.00000
162 true Empty Predicted protein (Fragment) OS=Physcomitrella patens subsp. patens GN=PHYPADRAFT_13339 PE=4 SV=1 A9SKT8_PHYPA PHYPADRAFT_13339 41 kDa unknown 0.00000 27334 0.00000 0.00000 0.00000 0.00000 0.00000 0.00000 0.00000 0.00000 0.00000 0.00000 0.00000 0.00000 0.00000
159 true Empty 2-isopropylmalate synthase OS=Nitrosomonas europaea (strain ATCC 19718 / NBRC 14298) GN=leuA PE=3 SV=1 LEU1_NITEU 56 kDa true unknown 0.00000 0.00000 0.00000 0.00000 0.00000 0.00000 0.00000 0.00000 0.00000 0.00000 0.00000 0.00000 2	874.3 0.00000 0.00000
160 true Empty Methionine--tRNA ligase OS=Psychrobacter sp. (strain PRwf-1) GN=metG PE=3 SV=1 SYM_PSYWF 79 kDa unknown 0.00000 0.00000 0.00000 0.00000 0.00000 0.00000 0.00000 0.00000 0.00000 0.00000 0.00000 4	507.0 0.00000 0.00000 0.00000
161 true Empty Effector protein hopAB1 OS=Pseudomonas savastanoi GN=hopAB1 PE=3 SV=1 HPAB1_PSESS 60 kDa unknown 0.00000 0.00000 0.00000 0.00000 0.00000 0.00000 0.00000 0.00000 0.00000 0.00000 0.00000 0.00000 0.00000 0.00000 4	90
167 true Empty Zinc finger C2H2 protein ECU10_0150 OS=Encephalitozoon cuniculi (strain GB-M1) GN=ECU10_0150 PE=3 SV=1 ZA15_ENCCU ECU10_0150 46 kDa unknown 7	091.3 0.00000 0.00000 0.00000 0.00000 0.00000 0.00000 0.00000 0.00000 0.00000 0.00000 0.00000 0.00000 0.00000 0.00000
12.3 true Empty Actin OS=Mesostigma viride PE=3 SV=1 ACT_MESVI 42 kDa true unknown 0.00000 0.00000 0.00000 0.00000 0.00000 0.00000 0.00000 0.00000 0.00000 0.00000 0.00000 0.00000 0.00000 0.00000 0.00000
34.1 true Empty Ubiquitin-60S ribosomal protein L40 OS=Cryptococcus neoformans var. neoformans serotype D (strain JEC21 / ATCC MYA-565) GN=UBI1 PE=1 SV=2 RL40_CRYNJ (+2) UBI1 15 kDa true unknown 0.00000 0.00000 0.00000 0.00000 715.00 0.00000 0.00000 0.00000 0.00000 0.00000 0.00000 0.00000 8	124.2 11676 0.00000
35.1 true Empty Putative uncharacterized protein JAC1L3-1 OS=Selaginella moellendorffii GN=JAC1L3-1 PE=4 SV=1 D8SF12_SELML JAC1L3-1 128 kDa true unknown 1	384.5 0.00000 0.00000 0.00000 0.00000 0.00000 0.00000 0.00000 0.00000 90.290 0.00000 0.00000 0.00000 925.44 83.304
4.16 true Empty 60 kDa chaperonin 2 OS=Saccharopolyspora erythraea (strain ATCC 11635 / DSM 40517 / JCM 4748 / NBRC 13426 / NCIMB 8594 / NRRL 2338) GN=groL2 PE=3 SV=1 CH602_SACEN 57 kDa true unknown 0.00000 0.00000 0.00000 1	997.8 0.00000 0.00000 0.00000 0.00000 0.00000 0.00000 0.00000 867.25 0.00000 0.00000 0.00000
196 true Empty 30S ribosomal protein S2 OS=Bdellovibrio bacteriovorus (strain ATCC 15356 / DSM 50701 / NCIB 9529 / HD100) GN=rpsB PE=3 SV=1 RS2_BDEBA 34 kDa unknown 0.00000 0.00000 0.00000 0.00000 0.00000 0.00000 0.00000 0.00000 0.00000 0.00000 0.00000 1	914.3 0.00000 0.00000 2	431
194 true Empty Predicted protein OS=Physcomitrella patens subsp. patens GN=PHYPADRAFT_81384 PE=4 SV=1 A9SMG1_PHYPA PHYPADRAFT_81384 72 kDa true unknown 0.00000 2	349.8 0.00000 0.00000 0.00000 0.00000 0.00000 0.00000 0.00000 0.00000 0.00000 1	237.7 2	963.8 0.00000 1	364.1
1.25 true Empty Predicted protein OS=Physcomitrella patens subsp. patens GN=PHYPADRAFT_74128 PE=4 SV=1 A9S3L6_PHYPA PHYPADRAFT_74128 72 kDa true unknown 2	588.0 10206 8	306.6 0.00000 0.00000 0.00000 0.00000 0.00000 0.00000 1	530.1 0.00000 0.00000 1	824.3 0.00000 0.00000
7.3 true Empty Protein translocase subunit SecA OS=Geobacter metallireducens (strain GS-15 / ATCC 53774 / DSM 7210) GN=secA PE=3 SV=1 SECA_GEOMG 102 kDa true unknown 0.00000 0.00000 4	909.0 0.00000 0.00000 0.00000 0.00000 0.00000 0.00000 0.00000 0.00000 0.00000 440.72 5	118.5 0.00000
143.1 true Empty 60 kDa chaperonin OS=Eubacterium eligens (strain ATCC 27750 / VPI C15-48) GN=groL PE=3 SV=1 CH60_EUBE2 57 kDa true unknown 0.00000 0.00000 0.00000 0.00000 856.87 852.54 0.00000 0.00000 0.00000 1	201.8 0.00000 1	190.1 0.00000 0.00000 0.00000
1.26 true Empty Predicted protein OS=Physcomitrella patens subsp. patens GN=PHYPADRAFT_87942 PE=4 SV=1 A9T4E9_PHYPA PHYPADRAFT_87942 96 kDa true unknown 1	527.7 0.00000 1	657.4 814.41 0.00000 0.00000 0.00000 0.00000 0.00000 1	962.7 1	776.7 0.00000 1	547.3 0.00000 0.00000
42.1 true Empty Myosin-1 OS=Emericella nidulans (strain FGSC A4 / ATCC 38163 / CBS 112.46 / NRRL 194 / M139) GN=myoA PE=1 SV=2 MYO1_EMENI myoA 137 kDa true unknown 5	064.2 715.87 0.00000 0.00000 2	087.0 0.00000 0.00000 0.00000 0.00000 3	366.9 1	595.8 0.00000 907.33 738.24 1	119
110.1 true Empty Translation initiation factor IF-2 OS=Arthrobacter aurescens (strain TC1) GN=infB PE=3 SV=1 IF2_ARTAT 99 kDa true unknown 3	027.3 2	039.0 0.00000 0.00000 0.00000 0.00000 0.00000 0.00000 0.00000 0.00000 2	548.3 4	599.3 0.00000 0.00000 0.00000
195 true Empty Protein disulfide-isomerase OS=Arthroderma benhamiae (strain ATCC MYA-4681 / CBS 112371) GN=ARB_02626 PE=3 SV=1 PDI_ARTBC ARB_02626 57 kDa unknown 0.00000 938.33 0.00000 0.00000 0.00000 0.00000 0.00000 0.00000 0.00000 0.00000 0.00000 0.00000 3	379.3 0.00000 959.00
20.1 true Empty ATP-dependent RNA helicase dbp2 OS=Aspergillus niger (strain CBS 513.88 / FGSC A1513) GN=dbp2 PE=3 SV=1 DBP2_ASPNC dbp2 61 kDa true unknown 0.00000 0.00000 0.00000 919.00 0.00000 0.00000 0.00000 0.00000 0.00000 0.00000 0.00000 0.00000 0.00000 2	394.3 2	4.1
184 true Empty Predicted protein OS=Physcomitrella patens subsp. patens GN=PHYPADRAFT_86164 PE=4 SV=1 A9SZJ5_PHYPA PHYPADRAFT_86164 51 kDa unknown 0.00000 0.00000 0.00000 0.00000 0.00000 0.00000 0.00000 0.00000 0.00000 0.00000 8	596.7 0.00000 0.00000 6	277.7 0.00000
193 true Empty Aspartate aminotransferase	mitochondrial OS=Schizosaccharomyces pombe (strain 972 / ATCC 24843) GN=SPBC725.01 PE=3 SV=1 AATM_SCHPO SPBC725 48 kDa true unknown 0.00000 8	474.4 0.00000 0.00000 0.00000 0.00000 0.00000 0.00000 0.00000 0.00000 0.00000 0.00000 0.00000 0.00000 0.00000
192 true Empty Uncharacterized protein OS=Musa acuminata subsp. malaccensis PE=4 SV=1 M0T2H3_MUSAM 103 kDa unknown 0.00000 0.00000 0.00000 2	526.7 0.00000 0.00000 0.00000 0.00000 0.00000 0.00000 0.00000 2	034.3 687.33 0.00000 0.00000
187 true Empty Elongation factor G OS=Lactobacillus sakei subsp. sakei (strain 23K) GN=fusA PE=3 SV=1 EFG_LACSS 77 kDa true unknown 1	348.4 0.00000 0.00000 0.00000 0.00000 0.00000 0.00000 0.00000 0.00000 0.00000 2	963.0 0.00000 0.00000 0.00000 0.00000
191 true Empty Chaperone protein DnaK OS=Magnetospirillum magneticum (strain AMB-1 / ATCC 700264) GN=dnaK PE=3 SV=1 DNAK_MAGSA 69 kDa true unknown 0.00000 0.00000 0.00000 0.00000 549.67 0.00000 0.00000 0.00000 0.00000 0.00000 1	791.5 0.00000 0.00000 0.00000 0.00000
188 true Empty Predicted protein OS=Physcomitrella patens subsp. patens GN=PHYPADRAFT_182359 PE=4 SV=1 A9S8J4_PHYPA PHYPADRAFT_182359 67 kDa true unknown 0.00000 0.00000 0.00000 0.00000 2	678.3 0.00000 0.00000 0.00000 0.00000 0.00000 0.00000 0.00000 0.00000 0.00000 2	284.7
180 true Empty DNA mismatch repair protein MutS OS=Lawsonia intracellularis (strain PHE/MN1-00) GN=mutS PE=3 SV=1 MUTS_LAWIP 102 kDa unknown 0.00000 1	373.3 0.00000 0.00000 0.00000 0.00000 0.00000 0.00000 0.00000 0.00000 0.00000 0.00000 3	853.3 0.00000 0.00000
176 true Empty Trehalose synthase complex regulatory subunit TPS3 OS=Saccharomyces cerevisiae (strain ATCC 204508 / S288c) GN=TPS3 PE=1 SV=3 TPS3_YEAST TPS3 119 kDa unknown 0.00000 0.00000 966.00 2	296.0 0.00000 0.00000 574.67 0.00000 0.00000 0.00000 0.00000 0.00000 0.00000 0.00000 0.00000
190 true Empty Putative uncharacterized protein OS=Selaginella moellendorffii GN=SELMODRAFT_444236 PE=4 SV=1 D8S838_SELML SELMODRAFT_444236 82 kDa unknown 0.00000 0.00000 0.00000 0.00000 0.00000 0.00000 0.00000 0.00000 0.00000 0.00000 0.00000 0.00000 0.00000 0.00000 3	773
175 true Empty Polyribonucleotide nucleotidyltransferase OS=Desulfovibrio vulgaris (strain Miyazaki F / DSM 19637) GN=pnp PE=3 SV=1 PNP_DESVM 81 kDa true unknown 0.00000 0.00000 0.00000 0.00000 0.00000 0.00000 0.00000 0.00000 0.00000 3	649.7 0.00000 0.00000 0.00000 0.00000 0.00000
174 true Empty Uracil-DNA glycosylase OS=Xylella fastidiosa (strain M23) GN=ung PE=3 SV=1 UNG_XYLF2 (+1) 28 kDa unknown 0.00000 0.00000 0.00000 0.00000 0.00000 623.67 0.00000 0.00000 0.00000 0.00000 0.00000 0.00000 0.00000 0.00000 0.00000
177 true Empty GMP synthase [glutamine-hydrolyzing] OS=Clostridium cellulolyticum (strain ATCC 35319 / DSM 5812 / JCM 6584 / H10) GN=guaA PE=3 SV=1 GUAA_CLOCE 58 kDa unknown 0.00000 0.00000 0.00000 0.00000 0.00000 2	494.7 0.00000 0.00000 0.00000 0.00000 0.00000 0.00000 0.00000 0.00000 0.00000
178 true Empty Nucleolar protein 4 OS=Saccharomyces cerevisiae (strain ATCC 204508 / S288c) GN=NOP4 PE=1 SV=1 NOP4_YEAST NOP4 78 kDa unknown 0.00000 0.00000 0.00000 0.00000 2	303.7 0.00000 0.00000 0.00000 0.00000 0.00000 0.00000 0.00000 0.00000 0.00000 0.00000
179 true Empty Tyrosine--tRNA ligase OS=Nitrobacter winogradskyi (strain Nb-255 / ATCC 25391) GN=tyrS PE=3 SV=1 SYY_NITWN 46 kDa unknown 0.00000 0.00000 0.00000 0.00000 0.00000 0.00000 0.00000 0.00000 0.00000 0.00000 0.00000 0.00000 3	137.0 0.00000 0.00000
181 true Empty Chorismate synthase OS=Sulfurimonas denitrificans (strain ATCC 33889 / DSM 1251) GN=aroC PE=3 SV=1 AROC_SULDN 39 kDa unknown 3	188.3 0.00000 0.00000 0.00000 0.00000 0.00000 0.00000 0.00000 0.00000 0.00000 0.00000 0.00000 0.00000 0.00000 0.00000
182 true Empty DNA topoisomerase OS=Amborella trichopoda GN=AMTR_s00202p00033660 PE=3 SV=1 W1NMN0_AMBTC AMTR_s00202p00033660 111 kDa unknown 0.00000 0.00000 0.00000 0.00000 0.00000 0.00000 0.00000 0.00000 0.00000 0.00000 0.00000 0.00000 3	760.3 0.00000 1	49
183 true Empty Protein translocase subunit SecA 2 OS=Staphylococcus epidermidis (strain ATCC 35984 / RP62A) GN=secA2 PE=3 SV=1 SECA2_STAEQ (+1) 91 kDa unknown 0.00000 0.00000 0.00000 0.00000 0.00000 0.00000 0.00000 0.00000 0.00000 0.00000 2	312.7 0.00000 0.00000 0.00000 0.00000
185 true Empty Uncharacterized protein OS=Amborella trichopoda GN=AMTR_s00056p00218850 PE=4 SV=1 U5CQ08_AMBTC AMTR_s00056p00218850 81 kDa unknown 0.00000 0.00000 0.00000 0.00000 0.00000 0.00000 0.00000 0.00000 0.00000 0.00000 0.00000 0.00000 0.00000 0.00000 3	555
186 true Empty Predicted protein OS=Physcomitrella patens subsp. patens GN=PHYPADRAFT_179576 PE=4 SV=1 A9RZ10_PHYPA PHYPADRAFT_179576 101 kDa unknown 0.00000 0.00000 0.00000 0.00000 0.00000 0.00000 0.00000 0.00000 0.00000 0.00000 0.00000 0.00000 0.00000 0.00000 4	501
189 true Empty Carbamate kinase 2 OS=Staphylococcus aureus (strain USA300) GN=arcC2 PE=3 SV=1 ARCC2_STAA3 (+7) 34 kDa unknown 0.00000 0.00000 0.00000 0.00000 0.00000 0.00000 0.00000 1	865.0 0.00000 0.00000 0.00000 0.00000 0.00000 0.00000 0.00000
12.4 true Empty Actin OS=Ajellomyces capsulatus (strain G186AR / H82 / ATCC MYA-2454 / RMSCC 2432) GN=HCBG_08711 PE=2 SV=2 ACT_AJECG HCBG_08711 42 kDa true unknown 0.00000 0.00000 0.00000 0.00000 0.00000 0.00000 0.00000 0.00000 0.00000 0.00000 0.00000 0.00000 0.00000 0.00000 0.00000
4.17 true Empty 60 kDa chaperonin OS=Cupriavidus necator (strain ATCC 17699 / H16 / DSM 428 / Stanier 337) GN=groL PE=3 SV=1 CH60_CUPNH 57 kDa true unknown 3	590.5 0.00000 0.00000 0.00000 0.00000 0.00000 0.00000 0.00000 0.00000 0.00000 0.00000 0.00000 0.00000 0.00000 0.00000
3.8 true Empty DNA-directed RNA polymerase subunit beta OS=Nitrobacter hamburgensis (strain X14 / DSM 10229) GN=rpoB PE=3 SV=1 RPOB_NITHX 154 kDa true unknown 146.55 0.00000 0.00000 0.00000 0.00000 0.00000 0.00000 0.00000 0.00000 0.00000 1	403.9 0.00000 1	923.2 0.00000 85.062
1.27 true Empty Predicted protein OS=Physcomitrella patens subsp. patens GN=PHYPADRAFT_68959 PE=4 SV=1 A9RPV1_PHYPA PHYPADRAFT_68959 90 kDa true unknown 933.83 0.00000 3	957.1 0.00000 0.00000 0.00000 0.00000 0.00000 0.00000 1	451.3 0.00000 0.00000 3	873.4 0.00000 910.41
4.18 true Empty 60 kDa chaperonin 3 OS=Rhizobium leguminosarum bv. viciae (strain 3841) GN=groL3 PE=3 SV=1 CH603_RHIL3 58 kDa true unknown 0.00000 450.55 940.02 0.00000 0.00000 0.00000 0.00000 0.00000 0.00000 0.00000 0.00000 0.00000 1	825.6 0.00000 0.00000
4.19 true Empty 60 kDa chaperonin 1 OS=Synechococcus sp. (strain CC9311) GN=groL1 PE=3 SV=1 CH601_SYNS3 58 kDa true unknown 0.00000 4	836.5 0.00000 0.00000 0.00000 0.00000 0.00000 0.00000 0.00000 0.00000 0.00000 0.00000 1	236.6 0.00000 0.00000
96.1 true Empty Transcription termination factor Rho OS=Rickettsia bellii (strain RML369-C) GN=rho PE=3 SV=1 RHO_RICBR 50 kDa true unknown 9	960.7 0.00000 0.00000 0.00000 0.00000 0.00000 0.00000 0.00000 0.00000 0.00000 0.00000 0.00000 0.00000 0.00000 0.00000
218 true Empty Polyribonucleotide nucleotidyltransferase OS=Vibrio parahaemolyticus serotype O3:K6 (strain RIMD 2210633) GN=pnp PE=3 SV=1 PNP_VIBPA 77 kDa true unknown 0.00000 0.00000 0.00000 0.00000 0.00000 0.00000 0.00000 0.00000 0.00000 0.00000 0.00000 0.00000 0.00000 0.00000 0.00000
4.20 true Empty 60 kDa chaperonin OS=Nitrosomonas europaea (strain ATCC 19718 / NBRC 14298) GN=groL PE=3 SV=1 CH60_NITEU 58 kDa true unknown 0.00000 1	660.8 0.00000 0.00000 0.00000 0.00000 0.00000 0.00000 0.00000 0.00000 846.98 0.00000 0.00000 0.00000 3	375.3
200 true Empty Uncharacterized protein OS=Musa acuminata subsp. malaccensis PE=4 SV=1 M0S7F1_MUSAM 38 kDa unknown 0.00000 28272 0.00000 0.00000 0.00000 2	712.7 0.00000 0.00000 0.00000 0.00000 0.00000 0.00000 0.00000 0.00000 0.00000
4.21 true Empty 60 kDa chaperonin OS=Clostridium beijerinckii (strain ATCC 51743 / NCIMB 8052) GN=groL PE=3 SV=1 CH60_CLOB8 58 kDa true unknown 205.41 0.00000 0.00000 0.00000 0.00000 0.00000 0.00000 0.00000 0.00000 0.00000 0.00000 0.00000 0.00000 0.00000 73.148
4.22 true Empty 60 kDa chaperonin OS=Haemophilus ducreyi (strain 35000HP / ATCC 700724) GN=groL PE=3 SV=2 CH60_HAEDU 58 kDa true unknown 0.00000 0.00000 0.00000 0.00000 0.00000 0.00000 0.00000 0.00000 0.00000 0.00000 0.00000 0.00000 3	052.1 0.00000 326.67
4.23 true Empty 60 kDa chaperonin OS=Thiobacillus denitrificans (strain ATCC 25259) GN=groL PE=3 SV=1 CH60_THIDA 58 kDa true unknown 0.00000 0.00000 0.00000 0.00000 0.00000 0.00000 0.00000 0.00000 0.00000 0.00000 0.00000 0.00000 0.00000 0.00000 1	111.2
98.1 true Empty Chaperone protein DnaJ OS=Shewanella frigidimarina (strain NCIMB 400) GN=dnaJ PE=3 SV=1 DNAJ_SHEFN 41 kDa true unknown 0.00000 0.00000 0.00000 0.00000 0.00000 0.00000 0.00000 0.00000 0.00000 0.00000 0.00000 0.00000 1	138.7 0.00000 3	9.7
216 true Empty Putative uncharacterized protein OS=Selaginella moellendorffii GN=SELMODRAFT_236037 PE=4 SV=1 D8T4G5_SELML SELMODRAFT_236037 75 kDa unknown 0.00000 0.00000 1	750.3 0.00000 0.00000 0.00000 0.00000 0.00000 0.00000 0.00000 88400 978.33 0.00000 0.00000 0.00000
209 true Empty Elongation factor G OS=Acidithiobacillus ferrooxidans (strain ATCC 23270 / DSM 14882 / CIP 104768 / NCIMB 8455) GN=fusA PE=3 SV=1 EFG_ACIF2 (+1) 77 kDa true unknown 4	719.1 2	819.1 0.00000 0.00000 0.00000 0.00000 0.00000 0.00000 0.00000 0.00000 0.00000 1	015.6 0.00000 0.00000 0.00000
1.28 true Empty Predicted protein OS=Physcomitrella patens subsp. patens GN=PHYPADRAFT_79601 PE=4 SV=1 A9SHT3_PHYPA PHYPADRAFT_79601 87 kDa true unknown 0.00000 0.00000 2	224.0 2	677.6 0.00000 0.00000 0.00000 0.00000 0.00000 1	293.0 0.00000 0.00000 441.85 0.00000 1	19.6
211 true Empty Pre-mRNA-splicing factor SLT11 OS=Cryptococcus neoformans var. neoformans serotype D (strain B-3501A) GN=SLT11 PE=3 SV=1 SLT11_CRYNB (+1) SLT11 36 kDa unknown 0.00000 2	301.7 2	019.0 0.00000 0.00000 0.00000 0.00000 0.00000 0.00000 0.00000 0.00000 0.00000 0.00000 0.00000 0.00000
4.24 true Empty 60 kDa chaperonin OS=Cellvibrio japonicus (strain Ueda107) GN=groL PE=3 SV=1 CH60_CELJU 57 kDa true unknown 0.00000 1	014.1 0.00000 0.00000 0.00000 0.00000 0.00000 0.00000 0.00000 125.16 18726 0.00000 0.00000 0.00000 0.00000
10.1 true Empty ATP synthase subunit alpha OS=Acidobacterium capsulatum (strain ATCC 51196 / DSM 11244 / JCM 7670 / NBRC 15755 / NCIMB 13165 / 161) GN=atpA PE=3 SV=1 ATPA_ACIC5 58 kDa true unknown 0.00000 2	588.8 0.00000 0.00000 0.00000 0.00000 0.00000 0.00000 0.00000 0.00000 0.00000 0.00000 0.00000 0.00000 878.33
203 true Empty GMP synthase [glutamine-hydrolyzing] OS=Streptococcus pneumoniae serotype 2 (strain D39 / NCTC 7466) GN=guaA PE=3 SV=1 GUAA_STRP2 (+10) 57 kDa true unknown 0.00000 7	826.6 0.00000 0.00000 0.00000 0.00000 0.00000 0.00000 0.00000 0.00000 0.00000 0.00000 0.00000 1	224.0 0.00000
4.25 true Empty 60 kDa chaperonin OS=Haemophilus parasuis serovar 5 (strain SH0165) GN=groL PE=3 SV=1 CH60_HAEPS 58 kDa true unknown 0.00000 0.00000 195.39 0.00000 0.00000 0.00000 0.00000 0.00000 0.00000 2	248.2 0.00000 0.00000 0.00000 1	703.3 448.36
68.1 true Empty Glutamate--tRNA ligase OS=Lactobacillus gasseri (strain ATCC 33323 / DSM 20243 / JCM 1131 / NCIMB 11718 / AM63) GN=gltX PE=3 SV=1 SYE_LACGA 57 kDa true unknown 0.00000 0.00000 0.00000 0.00000 0.00000 0.00000 0.00000 0.00000 0.00000 0.00000 0.00000 1	510.0 0.00000 0.00000 0.00000
206 true Empty Uncharacterized protein OS=Amborella trichopoda GN=AMTR_s00016p00153170 PE=4 SV=1 W1P8K8_AMBTC AMTR_s00016p00153170 111 kDa true unknown 0.00000 0.00000 0.00000 0.00000 0.00000 0.00000 0.00000 0.00000 0.00000 0.00000 0.00000 0.00000 0.00000 1	905.7 2	537.6
213 true Empty Probable 26S proteasome regulatory subunit rpn7 OS=Schizosaccharomyces pombe (strain 972 / ATCC 24843) GN=rpn7 PE=2 SV=1 RPN7_SCHPO rpn7 47 kDa unknown 0.00000 0.00000 0.00000 660.00 0.00000 0.00000 0.00000 0.00000 0.00000 0.00000 0.00000 0.00000 0.00000 0.00000 1	207.3
210 true Empty Putative uncharacterized protein MAP3KA1-1 OS=Selaginella moellendorffii GN=MAP3KA1-1 PE=4 SV=1 D8QSL1_SELML (+1) MAP3KA1-1 35 kDa true unknown 0.00000 0.00000 0.00000 0.00000 3	451.0 0.00000 0.00000 0.00000 0.00000 0.00000 0.00000 0.00000 0.00000 0.00000 0.00000
217 true Empty Uncharacterized protein OS=Musa acuminata subsp. malaccensis PE=4 SV=1 M0S543_MUSAM 18 kDa unknown 0.00000 0.00000 2	203.7 0.00000 3	069.0 0.00000 0.00000 0.00000 0.00000 0.00000 0.00000 0.00000 0.00000 0.00000 0.00000
199 true Empty D-lactate dehydrogenase [cytochrome] 3 OS=Saccharomyces cerevisiae (strain ATCC 204508 / S288c) GN=DLD3 PE=1 SV=1 DLD3_YEAST DLD3 55 kDa unknown 0.00000 0.00000 0.00000 0.00000 0.00000 0.00000 0.00000 0.00000 0.00000 0.00000 0.00000 0.00000 0.00000 7	084.0 0.00000
201 true Empty UPF0176 protein IL2351 OS=Idiomarina loihiensis (strain ATCC BAA-735 / DSM 15497 / L2-TR) GN=IL2351 PE=3 SV=1 Y2351_IDILO 36 kDa unknown 0.00000 0.00000 0.00000 0.00000 0.00000 0.00000 0.00000 0.00000 0.00000 0.00000 0.00000 0.00000 2	492.3 0.00000 0.00000
202 true Empty Probable glucose-6-phosphate 1-dehydrogenase C794.01c OS=Schizosaccharomyces pombe (strain 972 / ATCC 24843) GN=SPCC794.01c PE=3 SV=1 G6PD2_SCHPO SPCC794 54 kDa unknown 0.00000 9	532.3 0.00000 0.00000 0.00000 0.00000 0.00000 0.00000 0.00000 0.00000 0.00000 0.00000 0.00000 0.00000 0.00000
204 true Empty Foldase protein PrsA OS=Streptococcus mutans serotype c (strain ATCC 700610 / UA159) GN=prsA PE=3 SV=1 PRSA_STRMU 36 kDa unknown 0.00000 0.00000 1	653.3 0.00000 0.00000 0.00000 0.00000 0.00000 0.00000 0.00000 0.00000 0.00000 2	905.0 0.00000 0.00000
205 true Empty Autophagy-related protein 17 OS=Schizosaccharomyces pombe (strain 972 / ATCC 24843) GN=atg17 PE=3 SV=2 ATG17_SCHPO atg17 47 kDa unknown 0.00000 0.00000 0.00000 0.00000 0.00000 0.00000 0.00000 0.00000 0.00000 0.00000 0.00000 0.00000 1	293.0 0.00000 0.00000
207 true Empty Aspartate--tRNA(Asp/Asn) ligase OS=Psychrobacter arcticus (strain DSM 17307 / 273-4) GN=aspS PE=3 SV=1 SYDND_PSYA2 68 kDa true unknown 0.00000 5	223.9 0.00000 0.00000 0.00000 0.00000 0.00000 0.00000 0.00000 0.00000 0.00000 0.00000 0.00000 0.00000 0.00000
208 true Empty Pre-mRNA-splicing factor slu-7 OS=Neurospora crassa (strain ATCC 24698 / 74-OR23-1A / CBS 708.71 / DSM 1257 / FGSC 987) GN=slu-7 PE=3 SV=1 SLU7_NEUCR slu-7 46 kDa unknown 0.00000 0.00000 0.00000 0.00000 0.00000 0.00000 0.00000 0.00000 0.00000 0.00000 2	886.3 0.00000 0.00000 0.00000 0.00000
212 true Empty Putative uncharacterized protein OS=Selaginella moellendorffii GN=SELMODRAFT_445231 PE=4 SV=1 D8SGZ7_SELML SELMODRAFT_445231 137 kDa unknown 0.00000 0.00000 2	919.3 0.00000 0.00000 0.00000 0.00000 0.00000 0.00000 0.00000 0.00000 0.00000 0.00000 0.00000 0.00000
214 true Empty Predicted protein OS=Physcomitrella patens subsp. patens GN=PHYPADRAFT_135066 PE=4 SV=1 A9STD8_PHYPA PHYPADRAFT_135066 97 kDa unknown 0.00000 0.00000 0.00000 0.00000 0.00000 0.00000 0.00000 0.00000 0.00000 0.00000 3	817.7 0.00000 0.00000 0.00000 0.00000
215 true Empty Tryptophan--tRNA ligase	cytoplasmic OS=Schizosaccharomyces pombe (strain 972 / ATCC 24843) GN=wrs1 PE=1 SV=1 SYWC_SCHPO wrs1 45 kDa unknown 0.00000 0.00000 0.00000 0.00000 1	712.3 0.00000 0.00000 0.00000 0.00000 0.00000 0.00000 0.00000 0.00000 0.00000 0.00000
12.5 true Empty Actin	gamma OS=Penicillium chrysogenum GN=ACT PE=3 SV=1 ACTG_PENCH ACT 42 kDa true unknown 0.00000 0.00000 0.00000 118890 72104 78204 0.00000 0.00000 0.00000 0.00000 0.00000 0.00000 0.00000 0.00000 0.00000
24.2 true Empty 50S ribosomal protein L7/L12 OS=Methylobacterium nodulans (strain ORS2060 / LMG 21967) GN=rplL PE=3 SV=1 RL7_METNO 13 kDa true unknown 0.00000 0.00000 0.00000 0.00000 0.00000 0.00000 0.00000 0.00000 0.00000 0.00000 0.00000 0.00000 0.00000 0.00000 0.00000
16.1 true Empty Chromosome partition protein MukB OS=Haemophilus influenzae (strain ATCC 51907 / DSM 11121 / KW20 / Rd) GN=mukB PE=3 SV=1 MUKB_HAEIN 173 kDa true unknown 0.00000 0.00000 0.00000 0.00000 0.00000 0.00000 0.00000 0.00000 0.00000 0.00000 2	853.6 0.00000 732.67 0.00000 3	63.4
79.1 true Empty Heat shock 70 kDa protein 2 OS=Paracoccidioides lutzii (strain ATCC MYA-826 / Pb01) GN=HSP70-2 PE=2 SV=2 HSP72_PARBA HSP70-2 71 kDa true unknown 0.00000 5	551.1 0.00000 0.00000 0.00000 0.00000 0.00000 0.00000 0.00000 0.00000 0.00000 0.00000 0.00000 0.00000 910.83
34.2 true Empty Ubiquitin-40S ribosomal protein S27a-2 OS=Arabidopsis thaliana GN=RPS27AB PE=1 SV=2 R27AB_ARATH RPS27AB 18 kDa true unknown 0.00000 0.00000 6	176.5 0.00000 0.00000 0.00000 0.00000 0.00000 0.00000 0.00000 0.00000 0.00000 4	140.8 0.00000 0.00000
4.26 true Empty 60 kDa chaperonin 3 OS=Nitrobacter hamburgensis (strain X14 / DSM 10229) GN=groL3 PE=3 SV=1 CH603_NITHX 57 kDa true unknown 0.00000 0.00000 0.00000 0.00000 0.00000 0.00000 0.00000 0.00000 0.00000 0.00000 1	108.6 0.00000 0.00000 0.00000 0.00000
257 true Empty Deoxyribose-phosphate aldolase OS=Elusimicrobium minutum (strain Pei191) GN=deoC PE=3 SV=1 DEOC_ELUMP 23 kDa unknown 0.00000 0.00000 0.00000 0.00000 0.00000 0.00000 17023 12559 10191 0.00000 0.00000 0.00000 0.00000 0.00000 0.00000
4.27 true Empty 60 kDa chaperonin OS=Methylocella silvestris (strain BL2 / DSM 15510 / NCIMB 13906) GN=groL PE=3 SV=1 CH60_METSB 58 kDa true unknown 438.75 478.25 0.00000 721.61 0.00000 0.00000 0.00000 0.00000 0.00000 0.00000 0.00000 0.00000 0.00000 0.00000 0.00000
221 true Empty Uncharacterized protein OS=Musa acuminata subsp. malaccensis PE=4 SV=1 M0SUK5_MUSAM 19 kDa true unknown 0.00000 0.00000 5	948.5 5	179.7 0.00000 0.00000 0.00000 0.00000 0.00000 0.00000 0.00000 0.00000 0.00000 0.00000 0.00000
1.29 true Empty Uncharacterized protein OS=Physcomitrella patens subsp. patens GN=PHYPADRAFT_81652 PE=4 SV=1 A9SN69_PHYPA PHYPADRAFT_81652 91 kDa true unknown 0.00000 0.00000 3	665.7 0.00000 0.00000 0.00000 0.00000 0.00000 0.00000 0.00000 0.00000 0.00000 1	987.3 0.00000 1	645
1.30 true Empty Predicted protein OS=Physcomitrella patens subsp. patens GN=PHYPADRAFT_90116 PE=4 SV=1 A9TA97_PHYPA PHYPADRAFT_90116 57 kDa true unknown 4	186.0 0.00000 0.00000 1	414.9 0.00000 0.00000 0.00000 0.00000 0.00000 0.00000 0.00000 1	149.4 0.00000 1	714.9 0.00000
1.31 true Empty Predicted protein OS=Physcomitrella patens subsp. patens GN=PHYPADRAFT_64528 PE=4 SV=1 A9RCH7_PHYPA PHYPADRAFT_64528 70 kDa true unknown 9	770.5 88128 0.00000 0.00000 791.33 0.00000 0.00000 22149 0.00000 0.00000 0.00000 15008 0.00000 0.00000 0.00000
50.1 true Empty Elongation factor 1-alpha OS=Mucor circinelloides f. lusitanicus GN=TEF-1 PE=3 SV=1 EF1A1_MUCCL TEF-1 50 kDa true unknown 0.00000 0.00000 0.00000 0.00000 0.00000 0.00000 0.00000 0.00000 0.00000 0.00000 0.00000 3	640.5 0.00000 0.00000 2	737.1
238 true Empty tRNA (adenine(58)-N(1))-methyltransferase non-catalytic subunit trm6 OS=Schizosaccharomyces pombe (strain 972 / ATCC 24843) GN=gcd10 PE=3 SV=1 TRM6_SCHPO gcd10 53 kDa unknown 0.00000 0.00000 0.00000 0.00000 1	696.7 0.00000 0.00000 0.00000 0.00000 0.00000 0.00000 0.00000 0.00000 0.00000 455.00
4.28 true Empty 60 kDa chaperonin OS=Fervidobacterium nodosum (strain ATCC 35602 / DSM 5306 / Rt17-B1) GN=groL PE=3 SV=1 CH60_FERNB 58 kDa true unknown 0.00000 3	096.1 0.00000 0.00000 0.00000 0.00000 0.00000 0.00000 0.00000 0.00000 0.00000 0.00000 0.00000 0.00000 0.00000
4.29 true Empty 60 kDa chaperonin OS=Streptococcus uberis (strain ATCC BAA-854 / 0140J) GN=groL PE=3 SV=1 CH60_STRU0 57 kDa true unknown 211.30 0.00000 0.00000 0.00000 0.00000 0.00000 0.00000 0.00000 0.00000 1	820.8 0.00000 0.00000 0.00000 0.00000 0.00000
1.32 true Empty Predicted protein OS=Physcomitrella patens subsp. patens GN=PHYPADRAFT_73288 PE=4 SV=1 A9S1M9_PHYPA PHYPADRAFT_73288 87 kDa true unknown 0.00000 0.00000 0.00000 0.00000 0.00000 0.00000 0.00000 0.00000 0.00000 1	607.7 0.00000 0.00000 2	684.7 0.00000 0.00000
250 true Empty 2-hydroxyacid dehydrogenase homolog 2 OS=Schizosaccharomyces pombe (strain 972 / ATCC 24843) GN=SPAC186.02c PE=3 SV=1 DDH2_SCHPO SPAC186 36 kDa unknown 0.00000 0.00000 0.00000 0.00000 0.00000 0.00000 7	298.5 5	945.0 0.00000 0.00000 0.00000 0.00000 0.00000 0.00000 0.00000
23.1 true Empty Alanine--tRNA ligase OS=Acidovorax citrulli (strain AAC00-1) GN=alaS PE=3 SV=1 SYA_ACIAC 102 kDa true unknown 0.00000 1	176.1 3	064.9 0.00000 0.00000 0.00000 0.00000 0.00000 0.00000 0.00000 0.00000 72812 0.00000 0.00000 809.33
1.33 true Empty Predicted protein OS=Physcomitrella patens subsp. patens GN=PHYPADRAFT_72507 PE=4 SV=1 A9RZ96_PHYPA PHYPADRAFT_72507 52 kDa true unknown 1	854.1 0.00000 2	734.4 0.00000 0.00000 0.00000 0.00000 0.00000 0.00000 0.00000 0.00000 0.00000 0.00000 0.00000 0.00000
1.34 true Empty Predicted protein OS=Physcomitrella patens subsp. patens GN=PHYPADRAFT_99316 PE=4 SV=1 A9TZG4_PHYPA PHYPADRAFT_99316 103 kDa true unknown 0.00000 1	590.7 82.652 0.00000 0.00000 0.00000 0.00000 0.00000 0.00000 0.00000 0.00000 0.00000 0.00000 0.00000 1	610
1.35 true Empty Predicted protein OS=Physcomitrella patens subsp. patens GN=PHYPADRAFT_84808 PE=4 SV=1 A9SWA0_PHYPA PHYPADRAFT_84808 53 kDa true unknown 2	026.9 0.00000 1	234.7 0.00000 0.00000 0.00000 0.00000 0.00000 0.00000 0.00000 1	230.0 0.00000 21.704 0.00000 0.00000
220 true Empty ATP-dependent protease ATPase subunit HslU OS=Cellvibrio japonicus (strain Ueda107) GN=hslU PE=3 SV=1 HSLU_CELJU 49 kDa true unknown 0.00000 1	551.3 0.00000 0.00000 0.00000 0.00000 0.00000 0.00000 0.00000 659.67 0.00000 0.00000 0.00000 0.00000 0.00000
170.1 true Empty UvrABC system protein B OS=Caldicellulosiruptor saccharolyticus (strain ATCC 43494 / DSM 8903 / Tp8T 6331) GN=uvrB PE=3 SV=1 UVRB_CALS8 77 kDa true unknown 0.00000 0.00000 0.00000 0.00000 0.00000 0.00000 0.00000 0.00000 0.00000 0.00000 0.00000 5	156.3 0.00000 0.00000 0.00000
242 true Empty Predicted protein OS=Physcomitrella patens subsp. patens GN=PHYPADRAFT_162343 PE=4 SV=1 A9S1X2_PHYPA PHYPADRAFT_162343 242 kDa true unknown 0.00000 0.00000 0.00000 0.00000 0.00000 0.00000 0.00000 0.00000 0.00000 0.00000 0.00000 1	356.3 1	501.0 0.00000 0.00000
253 true Empty Uncharacterized protein OS=Musa acuminata subsp. malaccensis PE=3 SV=1 M0RK43_MUSAM 55 kDa unknown 0.00000 0.00000 10458 0.00000 0.00000 0.00000 0.00000 0.00000 0.00000 0.00000 1	191.3 0.00000 0.00000 0.00000 0.00000
229 true Empty Protein SSH4 OS=Candida glabrata (strain ATCC 2001 / CBS 138 / JCM 3761 / NBRC 0622 / NRRL Y-65) GN=SSH4 PE=3 SV=1 SSH4_CANGA SSH4 66 kDa unknown 1	066.0 0.00000 0.00000 2	974.0 0.00000 0.00000 0.00000 0.00000 0.00000 0.00000 0.00000 0.00000 0.00000 0.00000 0.00000
259 true Empty DNA ligase OS=Bordetella pertussis (strain Tohama I / ATCC BAA-589 / NCTC 13251) GN=ligA PE=3 SV=1 DNLJ_BORPE 76 kDa true unknown 0.00000 0.00000 1	690.3 0.00000 0.00000 0.00000 0.00000 0.00000 0.00000 0.00000 0.00000 15176 0.00000 0.00000 0.00000
247 true Empty HDA1 complex subunit 3 OS=Saccharomyces cerevisiae (strain ATCC 204508 / S288c) GN=HDA3 PE=1 SV=1 HDA3_YEAST HDA3 75 kDa unknown 0.00000 0.00000 0.00000 2	118.0 0.00000 0.00000 0.00000 0.00000 0.00000 0.00000 0.00000 0.00000 2	264.7 0.00000 0.00000
252 true Empty Peptide chain release factor 1 OS=Heliobacterium modesticaldum (strain ATCC 51547 / Ice1) GN=prfA PE=3 SV=1 RF1_HELMI 40 kDa unknown 0.00000 0.00000 0.00000 0.00000 0.00000 0.00000 0.00000 0.00000 0.00000 0.00000 1	204.7 0.00000 2	218.0 0.00000 0.00000
249 true Empty Biotin synthase OS=Kocuria rhizophila (strain ATCC 9341 / DSM 348 / NBRC 103217 / DC2201) GN=bioB PE=3 SV=1 BIOB_KOCRD 49 kDa unknown 0.00000 0.00000 0.00000 0.00000 0.00000 0.00000 0.00000 0.00000 0.00000 0.00000 3	879.3 0.00000 0.00000 0.00000 3	717
1.36 true Empty Predicted protein OS=Physcomitrella patens subsp. patens GN=PHYPADRAFT_70233 PE=4 SV=1 A9RT69_PHYPA PHYPADRAFT_70233 25 kDa true unknown 0.00000 2	289.9 851.55 0.00000 0.00000 0.00000 0.00000 0.00000 0.00000 0.00000 0.00000 0.00000 0.00000 1	002.7 0.00000
260 true Empty Predicted protein OS=Physcomitrella patens subsp. patens GN=PHYPADRAFT_103828 PE=4 SV=1 A9U7D5_PHYPA PHYPADRAFT_103828 21 kDa unknown 0.00000 3	764.7 0.00000 0.00000 0.00000 0.00000 0.00000 0.00000 0.00000 0.00000 1	089.0 0.00000 0.00000 0.00000 0.00000
251 true Empty Peptide chain release factor 2 OS=Yersinia pseudotuberculosis serotype I (strain IP32953) GN=prfB PE=3 SV=1 RF2_YERPS 41 kDa true unknown 688.76 0.00000 7	754.0 0.00000 0.00000 0.00000 0.00000 0.00000 0.00000 0.00000 0.00000 0.00000 0.00000 0.00000 0.00000
125.1 true Empty Glyceraldehyde-3-phosphate dehydrogenase OS=Sordaria macrospora GN=GPD PE=3 SV=2 G3P_SORMA GPD 36 kDa true unknown 0.00000 0.00000 0.00000 0.00000 0.00000 0.00000 0.00000 0.00000 0.00000 0.00000 0.00000 0.00000 0.00000 1	425.0 0.00000
256 true Empty Uncharacterized protein OS=Prunus persica GN=PRUPE_ppa015076mg PE=4 SV=1 M5W4G0_PRUPE PRUPE_ppa015076mg 47 kDa true unknown 0.00000 0.00000 0.00000 2	728.7 0.00000 0.00000 0.00000 0.00000 0.00000 0.00000 1	443.3 0.00000 0.00000 0.00000 0.00000
226 true Empty Replication factor C subunit 2 OS=Saccharomyces cerevisiae (strain ATCC 204508 / S288c) GN=RFC2 PE=1 SV=1 RFC2_YEAST RFC2 40 kDa unknown 0.00000 0.00000 0.00000 0.00000 0.00000 0.00000 0.00000 0.00000 0.00000 810.33 2	094.3 0.00000 0.00000 0.00000 0.00000
1.37 true Empty Predicted protein OS=Physcomitrella patens subsp. patens GN=PHYPADRAFT_66721 PE=4 SV=1 A9RIV8_PHYPA PHYPADRAFT_66721 47 kDa true unknown 0.00000 3	209.4 0.00000 0.00000 0.00000 7	037.8 0.00000 0.00000 0.00000 0.00000 0.00000 0.00000 0.00000 0.00000 662.33
233 true Empty Uncharacterized protein OS=Musa acuminata subsp. malaccensis PE=3 SV=1 M0RJ32_MUSAM 49 kDa unknown 0.00000 0.00000 0.00000 0.00000 0.00000 0.00000 0.00000 0.00000 0.00000 0.00000 1	184.7 0.00000 0.00000 0.00000 1	488.7
231 true Empty Translation initiation factor IF-2 OS=Vesicomyosocius okutanii subsp. Calyptogena okutanii (strain HA) GN=infB PE=3 SV=1 IF2_VESOH 89 kDa true unknown 0.00000 0.00000 0.00000 0.00000 0.00000 0.00000 0.00000 0.00000 0.00000 0.00000 0.00000 0.00000 0.00000 9	936.3 0.00000
258 true Empty Protein CFT1 OS=Coccidioides immitis (strain RS) GN=CFT1 PE=3 SV=1 CFT1_COCIM CFT1 153 kDa true unknown 0.00000 0.00000 1	115.7 0.00000 3	850.3 0.00000 0.00000 0.00000 0.00000 0.00000 0.00000 0.00000 0.00000 0.00000 0.00000
244 true Empty Biosynthetic arginine decarboxylase OS=Prochlorococcus marinus (strain MIT 9215) GN=speA PE=3 SV=1 SPEA_PROM2 73 kDa true unknown 0.00000 0.00000 0.00000 0.00000 0.00000 0.00000 0.00000 0.00000 0.00000 0.00000 0.00000 0.00000 0.00000 0.00000 2	309.7
255 true Empty Probable 6-phosphofructo-2-kinase C222.13c OS=Schizosaccharomyces pombe (strain 972 / ATCC 24843) GN=SPAC222.13c PE=3 SV=1 YFMD_SCHPO SPAC222 69 kDa unknown 0.00000 0.00000 0.00000 2	938.3 0.00000 0.00000 0.00000 0.00000 0.00000 0.00000 0.00000 0.00000 0.00000 0.00000 0.00000
222 true Empty Predicted protein OS=Physcomitrella patens subsp. patens GN=PHYPADRAFT_196153 PE=4 SV=1 A9TLA9_PHYPA PHYPADRAFT_196153 42 kDa unknown 0.00000 0.00000 0.00000 0.00000 0.00000 0.00000 0.00000 0.00000 0.00000 0.00000 0.00000 15811 0.00000 0.00000 0.00000
223 true Empty Leucine--tRNA ligase OS=Clostridium acetobutylicum (strain ATCC 824 / DSM 792 / JCM 1419 / LMG 5710 / VKM B-1787) GN=leuS PE=3 SV=1 SYL_CLOAB 93 kDa true unknown 0.00000 0.00000 0.00000 0.00000 0.00000 0.00000 0.00000 0.00000 0.00000 0.00000 929.00 0.00000 0.00000 0.00000 0.00000
224 true Empty Cytidylate kinase OS=Borrelia turicatae (strain 91E135) GN=cmk PE=3 SV=1 KCY_BORT9 26 kDa true unknown 0.00000 0.00000 0.00000 0.00000 0.00000 0.00000 0.00000 0.00000 0.00000 0.00000 0.00000 0.00000 7	995.7 0.00000 0.00000
225 true Empty Aspartate--tRNA ligase OS=Mycoplasma pneumoniae (strain ATCC 29342 / M129) GN=aspS PE=3 SV=1 SYD_MYCPN 64 kDa unknown 0.00000 2	721.3 0.00000 0.00000 0.00000 0.00000 0.00000 0.00000 0.00000 0.00000 0.00000 0.00000 0.00000 0.00000 0.00000
227 true Empty Protein transport protein DSL1 OS=Saccharomyces cerevisiae (strain ATCC 204508 / S288c) GN=DSL1 PE=1 SV=1 DSL1_YEAST DSL1 88 kDa unknown 0.00000 0.00000 0.00000 0.00000 0.00000 0.00000 0.00000 0.00000 0.00000 0.00000 0.00000 0.00000 0.00000 1	096.0 0.00000
228 true Empty Putative uncharacterized protein OS=Arabidopsis lyrata subsp. lyrata GN=ARALYDRAFT_352380 PE=4 SV=1 D7M1R6_ARALL ARALYDRAFT_352380 19 kDa unknown 0.00000 6	319.3 0.00000 0.00000 0.00000 0.00000 0.00000 0.00000 0.00000 0.00000 0.00000 0.00000 0.00000 0.00000 0.00000
230 true Empty UDP-N-acetylmuramoyl-L-alanyl-D-glutamate--2	6-diaminopimelate ligase OS=Peptoclostridium difficile (strain 630) GN=murE PE=3 SV=1 MURE_PEPD6 54 kDa unknown 0.00000 0.00000 5	637.0 0.00000 0.00000 0.00000 0.00000 0.00000 0.00000 0.00000 0.00000 0.00000 0.00000 0.00000 0.00000
232 true Empty GMP reductase OS=Lactobacillus salivarius (strain UCC118) GN=guaC PE=3 SV=1 GUAC_LACS1 36 kDa unknown 0.00000 2	522.7 0.00000 0.00000 0.00000 0.00000 0.00000 0.00000 0.00000 0.00000 0.00000 0.00000 0.00000 0.00000 0.00000
234 true Empty Predicted protein OS=Physcomitrella patens subsp. patens GN=PHYPADRAFT_76623 PE=4 SV=1 A9SA65_PHYPA PHYPADRAFT_76623 78 kDa true unknown 0.00000 0.00000 0.00000 0.00000 0.00000 0.00000 0.00000 0.00000 0.00000 0.00000 1	319.0 0.00000 0.00000 0.00000 0.00000
235 true Empty ATP-dependent helicase/deoxyribonuclease subunit B OS=Exiguobacterium sibiricum (strain DSM 17290 / JCM 13490 / 255-15) GN=addB PE=3 SV=1 ADDB_EXIS2 132 kDa unknown 0.00000 0.00000 0.00000 0.00000 0.00000 0.00000 0.00000 0.00000 0.00000 0.00000 0.00000 0.00000 3	585.0 0.00000 0.00000
236 true Empty Uncharacterized protein OS=Amborella trichopoda GN=AMTR_s00019p00237960 PE=4 SV=1 W1PIB2_AMBTC AMTR_s00019p00237960 35 kDa unknown 1	124.0 0.00000 0.00000 0.00000 0.00000 0.00000 0.00000 0.00000 0.00000 0.00000 0.00000 0.00000 0.00000 0.00000 0.00000
237 true Empty Reverse gyrase OS=Thermotoga maritima (strain ATCC 43589 / MSB8 / DSM 3109 / JCM 10099) GN=rgy PE=1 SV=1 RGYR_THEMA 128 kDa unknown 0.00000 0.00000 0.00000 0.00000 0.00000 0.00000 0.00000 0.00000 0.00000 0.00000 3	677.7 0.00000 0.00000 0.00000 0.00000
239 true Empty tRNA modification GTPase MnmE OS=Lactobacillus casei (strain ATCC 334) GN=mnmE PE=3 SV=1 MNME_LACC3 50 kDa unknown 0.00000 0.00000 0.00000 18964 0.00000 0.00000 0.00000 0.00000 0.00000 0.00000 0.00000 0.00000 0.00000 0.00000 0.00000
240 true Empty tRNA pseudouridine synthase A OS=Clostridium botulinum (strain Eklund 17B / Type B) GN=truA PE=3 SV=1 TRUA_CLOBB 28 kDa unknown 3	083.0 0.00000 0.00000 0.00000 0.00000 0.00000 0.00000 0.00000 0.00000 0.00000 0.00000 0.00000 0.00000 0.00000 0.00000
241 true Empty Cysteine desulfurase IscS OS=Pseudomonas mendocina (strain ymp) GN=iscS PE=3 SV=1 ISCS_PSEMY 45 kDa unknown 3	548.3 0.00000 0.00000 0.00000 0.00000 0.00000 0.00000 0.00000 0.00000 0.00000 0.00000 0.00000 0.00000 0.00000 0.00000
243 true Empty ATP synthase gamma chain OS=Gluconacetobacter diazotrophicus (strain ATCC 49037 / DSM 5601 / PAl5) GN=atpG PE=3 SV=1 ATPG_GLUDA 32 kDa unknown 0.00000 0.00000 782.67 0.00000 0.00000 0.00000 0.00000 0.00000 0.00000 0.00000 0.00000 0.00000 0.00000 0.00000 0.00000
245 true Empty Uncharacterized protein OS=Amborella trichopoda GN=AMTR_s00003p00177190 PE=4 SV=1 W1P8C4_AMBTC AMTR_s00003p00177190 142 kDa unknown 0.00000 0.00000 0.00000 0.00000 0.00000 0.00000 0.00000 0.00000 0.00000 902.00 0.00000 0.00000 0.00000 0.00000 0.00000
246 true Empty Guanylate kinase OS=Rhodoferax ferrireducens (strain ATCC BAA-621 / DSM 15236 / T118) GN=gmk PE=3 SV=1 KGUA_RHOFT 23 kDa unknown 0.00000 0.00000 0.00000 0.00000 0.00000 0.00000 0.00000 0.00000 0.00000 0.00000 0.00000 0.00000 0.00000 0.00000 1	445.7
248 true Empty Elongation factor Tu OS=Xylella fastidiosa (strain 9a5c) GN=tufA PE=1 SV=3 EFTU_XYLFA (+1) 43 kDa true unknown 1	652.6 0.00000 0.00000 0.00000 0.00000 0.00000 0.00000 0.00000 0.00000 0.00000 0.00000 0.00000 0.00000 0.00000 0.00000
254 true Empty Putative uncharacterized protein OS=Selaginella moellendorffii GN=SELMODRAFT_443146 PE=3 SV=1 D8RZ00_SELML SELMODRAFT_443146 34 kDa unknown 0.00000 0.00000 0.00000 0.00000 0.00000 0.00000 0.00000 0.00000 0.00000 0.00000 0.00000 0.00000 0.00000 0.00000 771.00
264 true Empty Photosystem I P700 chlorophyll a apoprotein A2 1 OS=Nostoc sp. (strain PCC 7120 / UTEX 2576) GN=psaB1 PE=3 SV=2 PSAB1_NOSS1 83 kDa unknown 0.00000 0.00000 0.00000 0.00000 0.00000 0.00000 18153 14630 11273 0.00000 0.00000 0.00000 0.00000 0.00000 0.00000
1.38 true Empty Predicted protein OS=Physcomitrella patens subsp. patens GN=PHYPADRAFT_90920 PE=4 SV=1 A9TCC9_PHYPA PHYPADRAFT_90920 86 kDa true unknown 0.00000 0.00000 968.00 3	627.0 0.00000 0.00000 0.00000 0.00000 0.00000 2	173.0 0.00000 19.426 0.00000 1	584.0 0.00000
1.39 true Empty Predicted protein OS=Physcomitrella patens subsp. patens GN=PHYPADRAFT_100553 PE=4 SV=1 A9U210_PHYPA PHYPADRAFT_100553 120 kDa true unknown 0.00000 13.356 1	466.0 0.00000 0.00000 0.00000 0.00000 0.00000 0.00000 11.535 0.00000 0.00000 0.00000 5	119.8 1	9
308 true Empty Uncharacterized protein OS=Musa acuminata subsp. malaccensis PE=4 SV=1 M0SCG2_MUSAM 39 kDa unknown 0.00000 0.00000 25404 10577 0.00000 0.00000 0.00000 0.00000 0.00000 0.00000 0.00000 0.00000 0.00000 0.00000 0.00000
10.2 true Empty ATP synthase subunit alpha	chloroplastic OS=Ananas comosus GN=atpA PE=3 SV=1 A0A0A8K8D1_ANACO atpA 55 kDa true unknown 5	733.0 0.00000 0.00000 919.45 0.00000 0.00000 0.00000 0.00000 0.00000 0.00000 0.00000 0.00000 0.00000 0.00000 0.00000
331 true Empty Uncharacterized protein OS=Musa acuminata subsp. malaccensis PE=4 SV=1 M0RGY3_MUSAM 21 kDa unknown 0.00000 0.00000 0.00000 0.00000 0.00000 0.00000 0.00000 0.00000 0.00000 0.00000 768.00 0.00000 600.67 0.00000 0.00000
145.1 true Empty LL-diaminopimelate aminotransferase OS=Prochlorococcus marinus (strain AS9601) GN=dapL PE=3 SV=1 DAPAT_PROMS 46 kDa true unknown 0.00000 0.00000 0.00000 0.00000 0.00000 0.00000 0.00000 0.00000 0.00000 0.00000 0.00000 0.00000 0.00000 0.00000 2	39.7
144.1 true Empty Chorismate synthase OS=Haemophilus influenzae (strain ATCC 51907 / DSM 11121 / KW20 / Rd) GN=aroC PE=3 SV=1 AROC_HAEIN 39 kDa true unknown 0.00000 0.00000 0.00000 0.00000 0.00000 0.00000 0.00000 0.00000 0.00000 3	091.3 0.00000 0.00000 0.00000 0.00000 0.00000
329 true Empty Coupling of ubiquitin conjugation to ER degradation protein 1 OS=Ashbya gossypii (strain ATCC 10895 / CBS 109.51 / FGSC 9923 / NRRL Y-1056) GN=CUE1 PE=3 SV=1 CUE1_ASHGO CUE1 21 kDa unknown 0.00000 0.00000 0.00000 0.00000 11697 0.00000 0.00000 0.00000 0.00000 0.00000 0.00000 0.00000 33289 0.00000 0.00000
289 true Empty Predicted protein OS=Physcomitrella patens subsp. patens GN=PHYPADRAFT_87645 PE=4 SV=1 A9T3M3_PHYPA PHYPADRAFT_87645 78 kDa true unknown 1	484.0 0.00000 1	126.0 0.00000 0.00000 0.00000 0.00000 18414 0.00000 1	466.3 864.33 0.00000 0.00000 0.00000 0.00000
4.30 true Empty 60 kDa chaperonin OS=Halothermothrix orenii (strain H 168 / OCM 544 / DSM 9562) GN=groL PE=3 SV=1 CH60_HALOH 58 kDa true unknown 0.00000 0.00000 0.00000 0.00000 859.85 0.00000 0.00000 0.00000 0.00000 0.00000 0.00000 0.00000 0.00000 0.00000 2	3.1
9.2 true Empty Catalase-peroxidase OS=Hahella chejuensis (strain KCTC 2396) GN=katG PE=3 SV=1 KATG_HAHCH 80 kDa true unknown 0.00000 0.00000 0.00000 0.00000 0.00000 0.00000 0.00000 0.00000 0.00000 0.00000 0.00000 0.00000 3	978.0 0.00000 0.00000
280 true Empty Subtilisin-like protease 3 OS=Arthroderma benhamiae (strain ATCC MYA-4681 / CBS 112371) GN=SUB3 PE=1 SV=1 SUB3_ARTBC (+2) SUB3 41 kDa true unknown 0.00000 0.00000 0.00000 0.00000 0.00000 0.00000 0.00000 0.00000 0.00000 0.00000 766.67 981.67 0.00000 0.00000 0.00000
10.3 true Empty ATP synthase subunit alpha	chloroplastic OS=Salicornia europaea GN=atpA PE=3 SV=1 A0A0G2QXB6_SALEU (+2) atpA 56 kDa true unknown 3	328.1 0.00000 0.00000 0.00000 0.00000 0.00000 0.00000 0.00000 0.00000 0.00000 0.00000 0.00000 0.00000 0.00000 0.00000
296 true Empty Colicin-Ia OS=Escherichia coli GN=cia PE=1 SV=2 CEIA_ECOLX 69 kDa true unknown 0.00000 0.00000 0.00000 0.00000 0.00000 0.00000 0.00000 0.00000 0.00000 0.00000 0.00000 2	249.7 0.00000 0.00000 0.00000
306 true Empty Uncharacterized protein OS=Gossypium raimondii GN=B456_008G073300 PE=4 SV=1 A0A0D2PQG9_GOSRA B456_008G073300 41 kDa true unknown 0.00000 0.00000 0.00000 0.00000 0.00000 0.00000 0.00000 0.00000 0.00000 0.00000 0.00000 2	296.0 0.00000 0.00000 0.00000
324 true Empty Homeodomain-like protein OS=Cynara cardunculus var. scolymus GN=Ccrd_015734 PE=4 SV=1 A0A118K3I0_CYNCS Ccrd_015734 38 kDa unknown 0.00000 0.00000 0.00000 0.00000 0.00000 0.00000 0.00000 0.00000 0.00000 0.00000 0.00000 1	800.0 4	271.7 0.00000 0.00000
325 true Empty Predicted protein OS=Physcomitrella patens subsp. patens GN=PHYPADRAFT_69611 PE=4 SV=1 A9RRV1_PHYPA PHYPADRAFT_69611 59 kDa true unknown 2	638.3 0.00000 0.00000 0.00000 0.00000 0.00000 0.00000 0.00000 0.00000 0.00000 0.00000 0.00000 0.00000 0.00000 0.00000
169.1 true Empty Elongation factor Tu OS=Flexistipes sinusarabici GN=tuf PE=3 SV=1 EFTU_FLESI 44 kDa true unknown 0.00000 0.00000 0.00000 0.00000 0.00000 0.00000 0.00000 0.00000 0.00000 0.00000 0.00000 0.00000 0.00000 0.00000 6	400.7
262 true Empty Uncharacterized protein OS=Musa acuminata subsp. malaccensis PE=4 SV=1 M0SYX9_MUSAM 16 kDa true unknown 0.00000 0.00000 0.00000 0.00000 1	068.7 0.00000 0.00000 0.00000 0.00000 0.00000 0.00000 0.00000 0.00000 0.00000 0.00000
263 true Empty Uncharacterized protein OS=Amborella trichopoda GN=AMTR_s00154p00035810 PE=4 SV=1 W1PC67_AMBTC AMTR_s00154p00035810 13 kDa unknown 0.00000 0.00000 0.00000 0.00000 1	508.3 0.00000 0.00000 0.00000 0.00000 0.00000 0.00000 0.00000 0.00000 0.00000 0.00000
265 true Empty Predicted protein OS=Physcomitrella patens subsp. patens GN=PHYPADRAFT_81444 PE=4 SV=1 A9SMM0_PHYPA PHYPADRAFT_81444 154 kDa unknown 0.00000 0.00000 0.00000 0.00000 2	058.7 0.00000 0.00000 0.00000 0.00000 0.00000 0.00000 0.00000 0.00000 0.00000 0.00000
309 true Empty Glucose-6-phosphate isomerase OS=Psychrobacter cryohalolentis (strain K5) GN=pgi PE=3 SV=1 G6PI_PSYCK 61 kDa true unknown 0.00000 12738 0.00000 0.00000 0.00000 0.00000 0.00000 0.00000 0.00000 0.00000 0.00000 0.00000 0.00000 0.00000 0.00000
266 true Empty ATP synthase subunit beta OS=Bacillus licheniformis (strain ATCC 14580 / DSM 13 / JCM 2505 / NBRC 12200 / NCIMB 9375 / NRRL NRS-1264 / Gibson 46) GN=atpD PE=3 SV=1 ATPB_BACLD 52 kDa true unknown 0.00000 0.00000 0.00000 0.00000 0.00000 0.00000 0.00000 0.00000 0.00000 0.00000 0.00000 0.00000 1	327.6 0.00000 0.00000
267 true Empty Glycosyltransferase OS=Selaginella moellendorffii GN=SELMODRAFT_178031 PE=3 SV=1 D8S9G7_SELML SELMODRAFT_178031 52 kDa unknown 6	622.7 0.00000 0.00000 0.00000 0.00000 0.00000 0.00000 0.00000 0.00000 0.00000 0.00000 0.00000 0.00000 0.00000 0.00000
268 true Empty CENP-C OS=Arabidopsis arenosa PE=2 SV=1 Q66LI7_ARAAE 80 kDa unknown 0.00000 0.00000 0.00000 0.00000 0.00000 0.00000 0.00000 0.00000 0.00000 0.00000 0.00000 0.00000 0.00000 1	270.3 0.00000
269 true Empty Phospholipase D OS=Selaginella moellendorffii GN=SELMODRAFT_269402 PE=3 SV=1 D8SYL9_SELML SELMODRAFT_269402 93 kDa unknown 0.00000 0.00000 0.00000 0.00000 0.00000 0.00000 0.00000 0.00000 0.00000 0.00000 3	973.3 0.00000 0.00000 0.00000 0.00000
270 true Empty Predicted protein OS=Physcomitrella patens subsp. patens GN=PHYPADRAFT_54994 PE=4 SV=1 A9RD17_PHYPA PHYPADRAFT_54994 41 kDa unknown 0.00000 0.00000 0.00000 910.33 0.00000 0.00000 0.00000 0.00000 0.00000 0.00000 0.00000 0.00000 0.00000 0.00000 0.00000
271 true Empty At2g45350/F14N22.7 OS=Arabidopsis thaliana GN=At2g42660 PE=2 SV=1 Q9SJJ0_ARATH At2g42660 29 kDa true unknown 0.00000 1	214.6 0.00000 0.00000 0.00000 0.00000 0.00000 0.00000 0.00000 0.00000 0.00000 0.00000 0.00000 0.00000 0.00000
272 true Empty Acyl-[acyl-carrier-protein] desaturase OS=Amborella trichopoda GN=AMTR_s00067p00187690 PE=3 SV=1 U5D8X9_AMBTC AMTR_s00067p00187690 45 kDa unknown 0.00000 0.00000 0.00000 0.00000 0.00000 0.00000 0.00000 0.00000 0.00000 0.00000 0.00000 1	160.7 0.00000 0.00000 0.00000
273 true Empty Aspartate--tRNA ligase	mitochondrial OS=Schizosaccharomyces pombe (strain 972 / ATCC 24843) GN=msd1 PE=3 SV=1 SYDM_SCHPO msd1 69 kDa unknown 0.00000 0.00000 0.00000 0.00000 0.00000 0.00000 0.00000 0.00000 0.00000 0.00000 0.00000 0.00000 0.00000 0.00000 1	24.7
274 true Empty Serine hydroxymethyltransferase OS=Shewanella baltica (strain OS223) GN=glyA PE=3 SV=1 GLYA_SHEB2 (+2) 45 kDa true unknown 1	133.7 0.00000 0.00000 15564 0.00000 0.00000 0.00000 0.00000 0.00000 0.00000 0.00000 0.00000 0.00000 0.00000 0.00000
275 true Empty Succinyl-CoA ligase [ADP-forming] subunit beta OS=Hamiltonella defensa subsp. Acyrthosiphon pisum (strain 5AT) GN=sucC PE=3 SV=1 SUCC_HAMD5 42 kDa unknown 4	402.7 0.00000 0.00000 0.00000 0.00000 0.00000 0.00000 0.00000 0.00000 0.00000 0.00000 0.00000 0.00000 0.00000 0.00000
276 true Empty 1-deoxy-D-xylulose 5-phosphate reductoisomerase OS=Elusimicrobium minutum (strain Pei191) GN=dxr PE=3 SV=1 DXR_ELUMP 43 kDa unknown 0.00000 0.00000 0.00000 0.00000 0.00000 24806 0.00000 0.00000 0.00000 0.00000 0.00000 0.00000 0.00000 0.00000 0.00000
277 true Empty Tyrosine--tRNA ligase OS=Nitrosococcus oceani (strain ATCC 19707 / NCIMB 11848) GN=tyrS PE=3 SV=1 SYY_NITOC 46 kDa unknown 0.00000 0.00000 0.00000 0.00000 0.00000 0.00000 0.00000 0.00000 0.00000 0.00000 0.00000 0.00000 6	518.3 0.00000 0.00000
278 true Empty ATP synthase subunit beta OS=Herpetosiphon aurantiacus (strain ATCC 23779 / DSM 785) GN=atpD PE=3 SV=1 ATPB_HERA2 51 kDa true unknown 0.00000 0.00000 0.00000 0.00000 0.00000 0.00000 0.00000 0.00000 0.00000 0.00000 0.00000 0.00000 2	631.3 0.00000 0.00000
279 true Empty Predicted protein OS=Physcomitrella patens subsp. patens GN=PHYPADRAFT_163180 PE=4 SV=1 A9S6Y7_PHYPA PHYPADRAFT_163180 14 kDa unknown 0.00000 0.00000 0.00000 0.00000 0.00000 0.00000 0.00000 0.00000 0.00000 0.00000 2	647.7 0.00000 0.00000 0.00000 0.00000
281 true Empty Protein YdgA OS=Escherichia coli (strain K12) GN=ydgA PE=1 SV=1 YDGA_ECOLI 55 kDa unknown 0.00000 0.00000 0.00000 0.00000 0.00000 0.00000 0.00000 1	413.3 0.00000 0.00000 0.00000 0.00000 0.00000 0.00000 0.00000
282 true Empty Elongation factor Ts OS=Herpetosiphon aurantiacus (strain ATCC 23779 / DSM 785) GN=tsf PE=3 SV=1 EFTS_HERA2 22 kDa unknown 0.00000 0.00000 0.00000 0.00000 0.00000 0.00000 0.00000 0.00000 0.00000 0.00000 0.00000 0.00000 1	155.0 0.00000 0.00000
283 true Empty Predicted protein OS=Physcomitrella patens subsp. patens GN=PHYPADRAFT_92441 PE=4 SV=1 A9TGG2_PHYPA PHYPADRAFT_92441 12 kDa unknown 0.00000 0.00000 0.00000 0.00000 0.00000 0.00000 0.00000 0.00000 0.00000 2	582.3 0.00000 0.00000 0.00000 0.00000 0.00000
284 true Empty Uncharacterized RNA methyltransferase lmo1703 OS=Listeria monocytogenes serovar 1/2a (strain ATCC BAA-679 / EGD-e) GN=lmo1703 PE=3 SV=1 Y1703_LISMO (+2) 51 kDa unknown 0.00000 0.00000 0.00000 0.00000 0.00000 0.00000 0.00000 0.00000 0.00000 0.00000 0.00000 0.00000 1	619.7 0.00000 0.00000
285 true Empty Proteasome subunit alpha type-1 OS=Saccharomyces cerevisiae (strain ATCC 204508 / S288c) GN=SCL1 PE=1 SV=1 PSA1_YEAST SCL1 28 kDa unknown 0.00000 0.00000 0.00000 0.00000 0.00000 0.00000 0.00000 0.00000 0.00000 0.00000 0.00000 0.00000 0.00000 0.00000 1	132
286 true Empty 30S ribosomal protein S20 OS=Frankia sp. (strain CcI3) GN=rpsT PE=3 SV=1 RS20_FRASC 10 kDa unknown 0.00000 0.00000 0.00000 0.00000 0.00000 0.00000 0.00000 0.00000 0.00000 0.00000 0.00000 0.00000 0.00000 0.00000 1	542
287 true Empty Glycine dehydrogenase (decarboxylating) OS=Bacteroides fragilis (strain YCH46) GN=gcvP PE=3 SV=1 GCSP_BACFR 105 kDa unknown 0.00000 0.00000 0.00000 0.00000 0.00000 0.00000 0.00000 0.00000 0.00000 0.00000 1	979.3 0.00000 0.00000 0.00000 0.00000
288 true Empty ATP phosphoribosyltransferase OS=Candida glabrata (strain ATCC 2001 / CBS 138 / JCM 3761 / NBRC 0622 / NRRL Y-65) GN=HIS1 PE=3 SV=1 HIS1_CANGA HIS1 34 kDa unknown 0.00000 0.00000 88937 0.00000 0.00000 0.00000 0.00000 0.00000 0.00000 0.00000 0.00000 0.00000 0.00000 0.00000 0.00000
290 true Empty Rhamnulose-1-phosphate aldolase OS=Listeria innocua serovar 6a (strain CLIP 11262) GN=rhaD PE=3 SV=1 RHAD_LISIN 30 kDa unknown 0.00000 0.00000 0.00000 0.00000 2	235.3 0.00000 0.00000 0.00000 0.00000 0.00000 0.00000 0.00000 0.00000 0.00000 0.00000
291 true Empty Putative uncharacterized protein OS=Selaginella moellendorffii GN=SELMODRAFT_407120 PE=4 SV=1 D8R3Z2_SELML (+1) SELMODRAFT_407120 70 kDa unknown 0.00000 0.00000 0.00000 0.00000 0.00000 0.00000 0.00000 0.00000 0.00000 0.00000 0.00000 0.00000 4	884.0 0.00000 0.00000
292 true Empty Cyclic pyranopterin monophosphate synthase OS=Synechocystis sp. (strain PCC 6803 / Kazusa) GN=moaA PE=3 SV=1 MOAA_SYNY3 37 kDa unknown 0.00000 0.00000 0.00000 0.00000 0.00000 0.00000 0.00000 0.00000 0.00000 0.00000 895.67 0.00000 0.00000 0.00000 0.00000
173.1 true Empty ATP synthase subunit beta OS=Anaeromyxobacter dehalogenans (strain 2CP-C) GN=atpD PE=3 SV=1 ATPB_ANADE 52 kDa true unknown 0.00000 0.00000 0.00000 0.00000 0.00000 0.00000 0.00000 0.00000 0.00000 0.00000 0.00000 0.00000 3	202.9 0.00000 0.00000
330 true Empty Endoglucanase G OS=Clostridium cellulolyticum (strain ATCC 35319 / DSM 5812 / JCM 6584 / H10) GN=celCCG PE=1 SV=2 GUNG_CLOCE 80 kDa unknown 0.00000 0.00000 0.00000 0.00000 0.00000 0.00000 0.00000 0.00000 0.00000 0.00000 0.00000 0.00000 1	077.7 0.00000 1	759.3
293 true Empty Nucleolar GTP-binding protein 1 OS=Saccharomyces cerevisiae (strain ATCC 204508 / S288c) GN=NOG1 PE=1 SV=1 NOG1_YEAST NOG1 74 kDa unknown 101620 0.00000 0.00000 0.00000 0.00000 0.00000 0.00000 0.00000 0.00000 0.00000 0.00000 0.00000 0.00000 0.00000 0.00000
294 true Empty mRNA 3'-end-processing protein RNA14 OS=Cryptococcus neoformans var. neoformans serotype D (strain B-3501A) GN=RNA14 PE=3 SV=1 RNA14_CRYNB RNA14 117 kDa true unknown 0.00000 0.00000 0.00000 0.00000 0.00000 0.00000 0.00000 0.00000 0.00000 0.00000 0.00000 828.33 0.00000 0.00000 0.00000
295 true Empty Autophagy-related protein 3 OS=Botryotinia fuckeliana (strain B05.10) GN=atg3 PE=3 SV=1 ATG3_BOTFB atg3 39 kDa true unknown 0.00000 0.00000 0.00000 823.67 0.00000 0.00000 0.00000 0.00000 0.00000 0.00000 0.00000 0.00000 0.00000 0.00000 0.00000
297 true Empty Argininosuccinate lyase OS=Leptospira interrogans serogroup Icterohaemorrhagiae serovar Lai (strain 56601) GN=argH PE=3 SV=1 ARLY_LEPIN 53 kDa true unknown 0.00000 1	762.0 1	389.3 0.00000 0.00000 0.00000 0.00000 0.00000 0.00000 0.00000 0.00000 0.00000 0.00000 0.00000 0.00000
298 true Empty Putative uncharacterized protein OS=Selaginella moellendorffii GN=SELMODRAFT_415442 PE=4 SV=1 D8RW49_SELML SELMODRAFT_415442 13 kDa unknown 0.00000 0.00000 0.00000 0.00000 0.00000 0.00000 0.00000 0.00000 0.00000 0.00000 0.00000 0.00000 0.00000 0.00000 1	190.3
299 true Empty Putative uncharacterized protein (Fragment) OS=Selaginella moellendorffii GN=SELMODRAFT_25885 PE=4 SV=1 D8QWM4_SELML SELMODRAFT_25885 24 kDa unknown 0.00000 0.00000 0.00000 0.00000 0.00000 0.00000 0.00000 0.00000 0.00000 2	263.0 0.00000 0.00000 0.00000 0.00000 0.00000
300 true Empty GTP-binding protein 1 OS=Schizosaccharomyces pombe (strain 972 / ATCC 24843) GN=gtp1 PE=3 SV=2 GTP1_SCHPO gtp1 41 kDa unknown 0.00000 0.00000 0.00000 0.00000 0.00000 0.00000 0.00000 0.00000 11588 0.00000 0.00000 0.00000 0.00000 0.00000 0.00000
172.1 true Empty ATP synthase subunit beta OS=Bacteroides fragilis (strain ATCC 25285 / DSM 2151 / JCM 11019 / NCTC 9343) GN=atpD PE=3 SV=1 ATPB_BACFN 55 kDa true unknown 0.00000 0.00000 0.00000 0.00000 0.00000 0.00000 0.00000 0.00000 0.00000 0.00000 0.00000 0.00000 2	356.3 0.00000 0.00000
301 true Empty Cyclic pyranopterin monophosphate synthase OS=Mannheimia succiniciproducens (strain MBEL55E) GN=moaA PE=3 SV=1 MOAA_MANSM 38 kDa unknown 0.00000 0.00000 0.00000 0.00000 0.00000 0.00000 0.00000 0.00000 0.00000 0.00000 0.00000 0.00000 993.00 0.00000 0.00000
302 true Empty Probable manganese-dependent inorganic pyrophosphatase OS=Staphylococcus aureus (strain Mu3 / ATCC 700698) GN=ppaC PE=3 SV=1 PPAC_STAA1 (+12) 34 kDa unknown 0.00000 0.00000 0.00000 0.00000 0.00000 0.00000 0.00000 0.00000 0.00000 0.00000 0.00000 2	601.7 0.00000 0.00000 0.00000
303 true Empty Predicted protein OS=Physcomitrella patens subsp. patens GN=PHYPADRAFT_173020 PE=4 SV=1 A9U0J4_PHYPA PHYPADRAFT_173020 141 kDa unknown 0.00000 2	349.3 0.00000 0.00000 0.00000 0.00000 0.00000 0.00000 0.00000 0.00000 0.00000 0.00000 0.00000 0.00000 1	587.3
304 true Empty Putative uncharacterized protein (Fragment) OS=Selaginella moellendorffii GN=SELMODRAFT_113931 PE=4 SV=1 D8SCV5_SELML SELMODRAFT_113931 78 kDa unknown 0.00000 0.00000 0.00000 0.00000 0.00000 0.00000 0.00000 0.00000 0.00000 0.00000 0.00000 0.00000 0.00000 0.00000 3	709.7
305 true Empty Putative uncharacterized protein OS=Selaginella moellendorffii GN=SELMODRAFT_415750 PE=4 SV=1 D8RX45_SELML SELMODRAFT_415750 107 kDa unknown 0.00000 0.00000 0.00000 0.00000 0.00000 0.00000 0.00000 0.00000 0.00000 0.00000 966.00 0.00000 0.00000 0.00000 0.00000
307 true Empty Putative uncharacterized protein OS=Selaginella moellendorffii GN=SELMODRAFT_74418 PE=4 SV=1 D8QNG8_SELML SELMODRAFT_74418 81 kDa unknown 0.00000 0.00000 0.00000 0.00000 0.00000 0.00000 0.00000 0.00000 0.00000 0.00000 0.00000 0.00000 0.00000 0.00000 960.67
198.1 true Empty Probable metallocarboxypeptidase A OS=Arthroderma benhamiae (strain ATCC MYA-4681 / CBS 112371) GN=MCPA PE=1 SV=2 MCPA_ARTBC MCPA 47 kDa true unknown 2	042.5 0.00000 0.00000 963.33 0.00000 0.00000 0.00000 0.00000 0.00000 0.00000 0.00000 0.00000 0.00000 0.00000 0.00000
310 true Empty Sensor histidine kinase	putative OS=Ricinus communis GN=RCOM_0999330 PE=4 SV=1 B9RZK5_RICCO RCOM_0999330 75 kDa unknown 7	724.3 0.00000 0.00000 0.00000 0.00000 0.00000 0.00000 0.00000 0.00000 0.00000 0.00000 0.00000 0.00000 0.00000 0.00000
311 true Empty Phosphomethylpyrimidine synthase OS=Synechococcus sp. (strain CC9605) GN=thiC PE=3 SV=1 THIC_SYNSC 53 kDa true unknown 0.00000 1	764.0 1	079.0 0.00000 0.00000 0.00000 0.00000 0.00000 0.00000 0.00000 0.00000 0.00000 0.00000 0.00000 0.00000
312 true Empty Putative uncharacterized protein OS=Selaginella moellendorffii GN=SELMODRAFT_231148 PE=4 SV=1 D8RBD1_SELML (+1) SELMODRAFT_231148 38 kDa unknown 0.00000 0.00000 0.00000 0.00000 0.00000 0.00000 0.00000 0.00000 0.00000 3	012.7 0.00000 0.00000 0.00000 0.00000 0.00000
313 true Empty Alanine racemase OS=Geobacter metallireducens (strain GS-15 / ATCC 53774 / DSM 7210) GN=alr PE=3 SV=1 ALR_GEOMG 41 kDa unknown 0.00000 0.00000 0.00000 5	093.7 0.00000 0.00000 0.00000 0.00000 0.00000 0.00000 0.00000 0.00000 0.00000 0.00000 0.00000
314 true Empty ATP synthase subunit beta OS=Staphylococcus epidermidis (strain ATCC 35984 / RP62A) GN=atpD PE=3 SV=1 ATPB_STAEQ 52 kDa true unknown 0.00000 0.00000 0.00000 0.00000 0.00000 0.00000 0.00000 0.00000 0.00000 0.00000 0.00000 0.00000 1	960.7 0.00000 0.00000
315 true Empty Actin-related protein 2/3 complex subunit 2 OS=Schizosaccharomyces pombe (strain 972 / ATCC 24843) GN=arc2 PE=1 SV=1 ARPC2_SCHPO arc2 37 kDa unknown 2	822.5 0.00000 0.00000 0.00000 0.00000 0.00000 0.00000 0.00000 0.00000 0.00000 0.00000 0.00000 3	023.5 0.00000 0.00000
316 true Empty Oxygen-dependent coproporphyrinogen-III oxidase OS=Pseudomonas stutzeri (strain A1501) GN=hemF PE=3 SV=1 HEM6_PSEU5 35 kDa unknown 0.00000 0.00000 0.00000 0.00000 0.00000 0.00000 0.00000 0.00000 0.00000 0.00000 0.00000 0.00000 4	035.0 0.00000 0.00000
317 true Empty Uncharacterized protein OS=Amborella trichopoda GN=AMTR_s00065p00170050 PE=4 SV=1 U5DE02_AMBTC AMTR_s00065p00170050 7 kDa unknown 0.00000 0.00000 0.00000 0.00000 10006 0.00000 0.00000 0.00000 0.00000 0.00000 0.00000 0.00000 0.00000 0.00000 0.00000
318 true Empty Cysteine desulfurase IscS OS=Neisseria meningitidis serogroup B (strain MC58) GN=iscS PE=3 SV=1 ISCS_NEIMB 45 kDa unknown 0.00000 0.00000 0.00000 0.00000 811.33 0.00000 0.00000 0.00000 0.00000 0.00000 0.00000 0.00000 0.00000 0.00000 0.00000
319 true Empty DNA replication licensing factor mcm5 OS=Schizosaccharomyces pombe (strain 972 / ATCC 24843) GN=mcm5 PE=1 SV=2 MCM5_SCHPO mcm5 80 kDa unknown 0.00000 0.00000 0.00000 0.00000 0.00000 0.00000 0.00000 0.00000 0.00000 0.00000 1	071.0 0.00000 0.00000 0.00000 0.00000
320 true Empty Uncharacterized methyltransferase YcgJ OS=Bacillus subtilis (strain 168) GN=ycgJ PE=1 SV=2 YCGJ_BACSU 29 kDa unknown 0.00000 0.00000 0.00000 0.00000 0.00000 0.00000 0.00000 0.00000 0.00000 0.00000 0.00000 0.00000 0.00000 0.00000 1	669
321 true Empty Putative uncharacterized protein OS=Selaginella moellendorffii GN=SELMODRAFT_407932 PE=4 SV=1 D8R583_SELML SELMODRAFT_407932 71 kDa unknown 0.00000 0.00000 0.00000 0.00000 0.00000 0.00000 0.00000 0.00000 0.00000 0.00000 0.00000 0.00000 4	048.0 0.00000 0.00000
322 true Empty Uncharacterized protein OS=Amborella trichopoda GN=AMTR_s00053p00199020 PE=4 SV=1 W1PBU1_AMBTC AMTR_s00053p00199020 15 kDa unknown 0.00000 0.00000 0.00000 0.00000 0.00000 0.00000 0.00000 0.00000 0.00000 0.00000 0.00000 1	931.0 0.00000 0.00000 0.00000
323 true Empty Uncharacterized protein OS=Amborella trichopoda GN=AMTR_s00154p00032290 PE=4 SV=1 W1PIG8_AMBTC AMTR_s00154p00032290 75 kDa unknown 0.00000 0.00000 0.00000 3	808.0 0.00000 0.00000 0.00000 0.00000 0.00000 0.00000 0.00000 0.00000 0.00000 0.00000 0.00000
326 true Empty F-box protein At3g56470 OS=Arabidopsis thaliana GN=At3g56470 PE=2 SV=1 FB204_ARATH At3g56470 43 kDa unknown 0.00000 0.00000 0.00000 0.00000 0.00000 0.00000 0.00000 0.00000 0.00000 0.00000 0.00000 0.00000 1	413.0 0.00000 0.00000
327 true Empty UDP-glucuronate 4-epimerase 2 OS=Arabidopsis thaliana GN=GAE2 PE=2 SV=1 GAE2_ARATH GAE2 48 kDa unknown 0.00000 0.00000 0.00000 0.00000 0.00000 0.00000 0.00000 0.00000 0.00000 0.00000 0.00000 0.00000 0.00000 0.00000 1	568.7
328 true Empty Release factor glutamine methyltransferase OS=Xanthomonas campestris pv. campestris (strain ATCC 33913 / DSM 3586 / NCPPB 528 / LMG 568 / P 25) GN=prmC PE=3 SV=1 PRMC_XANCP 30 kDa unknown 0.00000 0.00000 0.00000 0.00000 0.00000 0.00000 0.00000 0.00000 0.00000 0.00000 1	103.3 0.00000 0.00000 0.00000 0.00000
12.6 true Empty Actin-1 OS=Schizophyllum commune GN=ACT1 PE=2 SV=1 ACT1_SCHCO ACT1 42 kDa true unknown 0.00000 0.00000 0.00000 0.00000 0.00000 0.00000 0.00000 0.00000 0.00000 0.00000 0.00000 0.00000 0.00000 17939 0.00000
4.31 true Empty 60 kDa chaperonin OS=Acinetobacter baumannii (strain AB307-0294) GN=groL PE=3 SV=1 CH60_ACIB3 57 kDa true unknown 12857 0.00000 0.00000 0.00000 0.00000 0.00000 0.00000 0.00000 0.00000 0.00000 0.00000 9	478.0 0.00000 0.00000 0.00000
49.1 true Empty 10 kDa chaperonin 1 OS=Rhizobium meliloti (strain 1021) GN=groS1 PE=2 SV=1 CH101_RHIME 11 kDa true unknown 0.00000 0.00000 6	898.1 0.00000 0.00000 0.00000 0.00000 0.00000 0.00000 0.00000 0.00000 0.00000 0.00000 0.00000 0.00000
12.7 true Empty Actin-1 OS=Glycine max GN=SAC1 PE=3 SV=2 ACT1_SOYBN SAC1 41 kDa true unknown 0.00000 0.00000 0.00000 0.00000 0.00000 0.00000 0.00000 0.00000 0.00000 0.00000 0.00000 0.00000 0.00000 0.00000 13531
34.3 true Empty Uncharacterized protein OS=Musa acuminata subsp. malaccensis PE=4 SV=1 M0TND7_MUSAM 16 kDa true unknown 46694 0.00000 5	389.1 0.00000 0.00000 0.00000 0.00000 0.00000 0.00000 0.00000 0.00000 0.00000 0.00000 0.00000 0.00000
4.32 true Empty 60 kDa chaperonin OS=Cupriavidus metallidurans (strain ATCC 43123 / DSM 2839 / NBRC 102507 / CH34) GN=groL PE=3 SV=1 CH60_CUPMC 57 kDa true unknown 0.00000 3	199.2 0.00000 0.00000 0.00000 0.00000 0.00000 0.00000 0.00000 0.00000 0.00000 0.00000 0.00000 3	392.0 0.00000
366 true Empty Putative 3-methyladenine DNA glycosylase OS=Leifsonia xyli subsp. xyli (strain CTCB07) GN=Lxx06100 PE=3 SV=1 3MGH_LEIXX 22 kDa unknown 0.00000 144910 0.00000 0.00000 5	858.0 0.00000 0.00000 0.00000 0.00000 0.00000 0.00000 0.00000 0.00000 0.00000 0.00000
343 true Empty Histidine--tRNA ligase OS=Rhodopseudomonas palustris (strain ATCC BAA-98 / CGA009) GN=hisS PE=3 SV=1 SYH_RHOPA 57 kDa true unknown 0.00000 0.00000 0.00000 2	837.0 0.00000 0.00000 0.00000 0.00000 0.00000 0.00000 0.00000 0.00000 0.00000 0.00000 0.00000
367 true Empty Predicted protein OS=Physcomitrella patens subsp. patens GN=PHYPADRAFT_110219 PE=3 SV=1 A9T5F8_PHYPA PHYPADRAFT_110219 9 kDa unknown 997780 0.00000 0.00000 0.00000 252600 0.00000 0.00000 0.00000 0.00000 0.00000 0.00000 0.00000 0.00000 0.00000 0.00000
436 true Empty Exoglucanase OS=Agaricus bisporus GN=cel2 PE=2 SV=1 GUX2_AGABI cel2 54 kDa true unknown 0.00000 0.00000 0.00000 0.00000 0.00000 0.00000 0.00000 0.00000 0.00000 3	652.0 0.00000 0.00000 0.00000 0.00000 0.00000
1.40 true Empty Predicted protein OS=Physcomitrella patens subsp. patens GN=PHYPADRAFT_92656 PE=4 SV=1 A9TH04_PHYPA PHYPADRAFT_92656 78 kDa true unknown 0.00000 0.00000 0.00000 0.00000 568.67 0.00000 0.00000 0.00000 0.00000 0.00000 0.00000 0.00000 0.00000 0.00000 0.00000
38.1 true Empty Pesticidal crystal protein Cry1Ag OS=Bacillus thuringiensis GN=cry1Ag PE=2 SV=1 CR1AG_BACTU 133 kDa true unknown 0.00000 0.00000 0.00000 0.00000 0.00000 0.00000 0.00000 0.00000 0.00000 0.00000 0.00000 2	438.5 616.15 0.00000 0.00000
4.33 true Empty 60 kDa chaperonin 1 OS=Erythrobacter litoralis (strain HTCC2594) GN=groL1 PE=3 SV=1 CH601_ERYLH 57 kDa true unknown 0.00000 0.00000 0.00000 0.00000 0.00000 0.00000 0.00000 0.00000 0.00000 0.00000 0.00000 0.00000 0.00000 7	211.7 0.00000
5.14 true Empty Uncharacterized protein OS=Musa acuminata subsp. malaccensis PE=4 SV=1 M0S0V1_MUSAM 13 kDa true unknown 0.00000 0.00000 0.00000 0.00000 0.00000 448.33 0.00000 0.00000 0.00000 0.00000 0.00000 0.00000 0.00000 0.00000 928.67
383 true Empty Glycine--tRNA ligase beta subunit OS=Haemophilus parasuis serovar 5 (strain SH0165) GN=glyS PE=3 SV=1 SYGB_HAEPS 76 kDa true unknown 0.00000 0.00000 0.00000 1	267.7 0.00000 0.00000 0.00000 0.00000 0.00000 0.00000 0.00000 0.00000 0.00000 0.00000 0.00000
389 true Empty Maintenance of telomere capping protein 6 OS=Meyerozyma guilliermondii (strain ATCC 6260 / CBS 566 / DSM 6381 / JCM 1539 / NBRC 10279 / NRRL Y-324) GN=MTC6 PE=3 SV=2 MTC6_PICGU MTC6 65 kDa unknown 0.00000 0.00000 0.00000 0.00000 0.00000 0.00000 6	101.5 0.00000 2	763.0 0.00000 0.00000 0.00000 0.00000 0.00000 0.00000
96.2 true Empty Transcription termination factor Rho OS=Chromobacterium violaceum (strain ATCC 12472 / DSM 30191 / JCM 1249 / NBRC 12614 / NCIMB 9131 / NCTC 9757) GN=rho PE=3 SV=1 RHO_CHRVO 47 kDa true unknown 1	648.9 0.00000 0.00000 0.00000 0.00000 0.00000 0.00000 0.00000 0.00000 0.00000 0.00000 0.00000 0.00000 0.00000 0.00000
374 true Empty C-phycocyanin alpha chain OS=Thermosynechococcus elongatus (strain BP-1) GN=cpcA PE=1 SV=1 PHCA_THEEB 17 kDa unknown 0.00000 0.00000 0.00000 0.00000 0.00000 0.00000 0.00000 0.00000 3	733.0 0.00000 1	270.0 0.00000 0.00000 0.00000 0.00000
4.34 true Empty 60 kDa chaperonin OS=Bacillus methylotrophicus (strain DSM 23117 / BGSC 10A6 / FZB42) GN=groL PE=3 SV=1 CH60_BACMF 57 kDa true unknown 11284 0.00000 0.00000 0.00000 0.00000 0.00000 0.00000 0.00000 0.00000 0.00000 0.00000 0.00000 0.00000 0.00000 0.00000
351 true Empty DNA polymerase III subunit alpha OS=Haemophilus influenzae (strain ATCC 51907 / DSM 11121 / KW20 / Rd) GN=dnaE PE=3 SV=1 DPO3A_HAEIN 130 kDa true unknown 0.00000 0.00000 0.00000 0.00000 0.00000 0.00000 0.00000 0.00000 0.00000 0.00000 1	930.6 0.00000 0.00000 0.00000 0.00000
353 true Empty Glycerol kinase OS=Streptococcus pyogenes serotype M1 GN=glpK PE=3 SV=1 GLPK_STRP1 (+8) 56 kDa true unknown 0.00000 0.00000 0.00000 0.00000 0.00000 0.00000 0.00000 0.00000 0.00000 0.00000 0.00000 0.00000 0.00000 0.00000 3	68.7
111.1 true Empty 2-isopropylmalate synthase OS=Bradyrhizobium sp. (strain BTAi1 / ATCC BAA-1182) GN=leuA PE=3 SV=1 LEU1_BRASB 57 kDa true unknown 0.00000 1	184.0 0.00000 0.00000 0.00000 0.00000 0.00000 0.00000 0.00000 0.00000 7	432.3 0.00000 0.00000 0.00000 0.00000
378 true Empty Putative 3-methyladenine DNA glycosylase OS=Chlorobium luteolum (strain DSM 273 / 2530) GN=Plut_0321 PE=3 SV=1 3MGH_CHLL7 22 kDa unknown 0.00000 0.00000 0.00000 5	890.0 0.00000 3	668.0 0.00000 0.00000 0.00000 0.00000 0.00000 0.00000 0.00000 0.00000 0.00000
423 true Empty OSIGBa0159H11-OSIGBa0137A07.10 protein OS=Oryza sativa GN=OSIGBa0159H11-OSIGBa0137A07.10 PE=4 SV=1 Q01HU9_ORYSA OSIGBa0159H11-OSIGBa0137A07 29 kDa unknown 0.00000 0.00000 0.00000 0.00000 0.00000 0.00000 0.00000 0.00000 0.00000 0.00000 0.00000 2	073.0 0.00000 3	104.0 0.00000
395 true Empty Alanine--tRNA ligase OS=Shewanella amazonensis (strain ATCC BAA-1098 / SB2B) GN=alaS PE=3 SV=2 SYA_SHEAM 95 kDa true unknown 0.00000 0.00000 0.00000 0.00000 0.00000 0.00000 0.00000 0.00000 0.00000 0.00000 2	179.3 0.00000 0.00000 0.00000 0.00000
406 true Empty Uncharacterized protein OS=Eutrema salsugineum GN=EUTSA_v10020861mg PE=4 SV=1 V4MB68_EUTSA EUTSA_v10020861mg 45 kDa true unknown 0.00000 0.00000 0.00000 0.00000 0.00000 0.00000 0.00000 0.00000 0.00000 0.00000 0.00000 0.00000 0.00000 0.00000 1	894.3
342 true Empty Phosphomethylpyrimidine synthase OS=Psychrobacter cryohalolentis (strain K5) GN=thiC PE=3 SV=1 THIC_PSYCK 70 kDa true unknown 0.00000 0.00000 0.00000 15492 0.00000 0.00000 0.00000 0.00000 0.00000 0.00000 0.00000 0.00000 0.00000 0.00000 0.00000
1.41 true Empty Uncharacterized protein OS=Physcomitrella patens subsp. patens GN=PHYPADRAFT_95646 PE=4 SV=1 A9TQ16_PHYPA PHYPADRAFT_95646 32 kDa true unknown 0.00000 788.14 0.00000 0.00000 0.00000 0.00000 0.00000 0.00000 0.00000 4	765.3 0.00000 0.00000 0.00000 0.00000 0.00000
335 true Empty Uncharacterized protein OS=Musa acuminata subsp. malaccensis PE=4 SV=1 M0SQG5_MUSAM 6 kDa unknown 0.00000 0.00000 0.00000 0.00000 0.00000 0.00000 0.00000 0.00000 0.00000 0.00000 0.00000 1	796.0 0.00000 0.00000 0.00000
336 true Empty Arginine--tRNA ligase OS=Helicobacter pylori (strain P12) GN=argS PE=3 SV=1 SYR_HELP2 62 kDa true unknown 0.00000 0.00000 0.00000 0.00000 0.00000 0.00000 0.00000 0.00000 0.00000 0.00000 7	388.3 0.00000 0.00000 0.00000 0.00000
337 true Empty Protein translocase subunit SecY OS=Staphylococcus carnosus (strain TM300) GN=secY PE=3 SV=2 SECY_STACT 47 kDa unknown 0.00000 0.00000 0.00000 0.00000 0.00000 0.00000 2	178.5 0.00000 0.00000 0.00000 0.00000 0.00000 0.00000 0.00000 0.00000
338 true Empty Uncharacterized protein ACIAD3023 OS=Acinetobacter baylyi (strain ATCC 33305 / BD413 / ADP1) GN=ACIAD3023 PE=3 SV=1 Y3023_ACIAD 15 kDa unknown 0.00000 0.00000 0.00000 0.00000 0.00000 0.00000 0.00000 0.00000 0.00000 0.00000 0.00000 0.00000 0.00000 0.00000 419.50
339 true Empty 30S ribosomal protein S2 OS=Ralstonia pickettii (strain 12J) GN=rpsB PE=3 SV=1 RS2_RALPJ 27 kDa true unknown 0.00000 0.00000 0.00000 0.00000 0.00000 11040 0.00000 0.00000 0.00000 0.00000 0.00000 0.00000 0.00000 0.00000 0.00000
340 true Empty Predicted protein OS=Physcomitrella patens subsp. patens GN=PHYPADRAFT_149226 PE=4 SV=1 A9TQZ6_PHYPA PHYPADRAFT_149226 18 kDa unknown 0.00000 0.00000 0.00000 0.00000 0.00000 0.00000 94364 0.00000 0.00000 0.00000 0.00000 0.00000 0.00000 0.00000 0.00000
341 true Empty NADH-quinone oxidoreductase subunit B 1 OS=Rhodopseudomonas palustris (strain ATCC BAA-98 / CGA009) GN=nuoB1 PE=3 SV=1 NUOB1_RHOPA (+1) 22 kDa unknown 0.00000 0.00000 0.00000 0.00000 0.00000 0.00000 94364 0.00000 0.00000 0.00000 0.00000 0.00000 0.00000 0.00000 0.00000
344 true Empty Putative uncharacterized protein OS=Selaginella moellendorffii GN=SELMODRAFT_403436 PE=4 SV=1 D8QRE7_SELML (+1) SELMODRAFT_403436 16 kDa unknown 0.00000 0.00000 0.00000 0.00000 0.00000 0.00000 0.00000 0.00000 0.00000 0.00000 0.00000 4	230.5 0.00000 0.00000 0.00000
345 true Empty 6	7-dimethyl-8-ribityllumazine synthase OS=Laribacter hongkongensis (strain HLHK9) GN=ribH PE=3 SV=1 RISB_LARHH 17 kDa unknown 0.00000 0.00000 0.00000 1	976.0 0.00000 0.00000 0.00000 0.00000 0.00000 0.00000 0.00000 0.00000 0.00000 0.00000 0.00000
346 true Empty Phenylalanine--tRNA ligase alpha subunit OS=Bordetella bronchiseptica (strain ATCC BAA-588 / NCTC 13252 / RB50) GN=pheS PE=3 SV=1 SYFA_BORBR (+1) 39 kDa true unknown 0.00000 0.00000 0.00000 0.00000 0.00000 0.00000 0.00000 0.00000 0.00000 0.00000 3	572.0 0.00000 0.00000 0.00000 0.00000
347 true Empty 50S ribosomal protein L23 OS=Solibacter usitatus (strain Ellin6076) GN=rplW PE=3 SV=1 RL23_SOLUE 11 kDa unknown 0.00000 0.00000 0.00000 0.00000 0.00000 0.00000 0.00000 0.00000 0.00000 0.00000 0.00000 2	307.5 0.00000 0.00000 0.00000
348 true Empty Uncharacterized protein OS=Amborella trichopoda GN=AMTR_s00061p00147320 PE=4 SV=1 U5DCH9_AMBTC AMTR_s00061p00147320 13 kDa unknown 2	476.5 0.00000 0.00000 0.00000 0.00000 0.00000 0.00000 0.00000 0.00000 0.00000 0.00000 0.00000 0.00000 0.00000 0.00000
349 true Empty Elongation factor Ts OS=Wolbachia pipientis wMel GN=tsf PE=3 SV=1 EFTS_WOLPM (+1) 32 kDa unknown 0.00000 0.00000 0.00000 0.00000 0.00000 0.00000 0.00000 0.00000 0.00000 0.00000 0.00000 0.00000 0.00000 0.00000 7	721.5
350 true Empty Glutamine-binding periplasmic protein OS=Escherichia coli O157:H7 GN=glnH PE=3 SV=1 GLNH_ECO57 (+2) 27 kDa unknown 0.00000 0.00000 0.00000 0.00000 0.00000 0.00000 0.00000 0.00000 0.00000 0.00000 0.00000 0.00000 0.00000 13125 0.00000
219.1 true Empty Serine hydroxymethyltransferase OS=Shewanella oneidensis (strain MR-1) GN=glyA PE=3 SV=1 GLYA_SHEON 45 kDa true unknown 0.00000 0.00000 0.00000 9	235.6 0.00000 0.00000 0.00000 0.00000 0.00000 0.00000 0.00000 0.00000 0.00000 0.00000 0.00000
352 true Empty Uncharacterized protein (Fragment) OS=Genlisea aurea GN=M569_05416 PE=4 SV=1 S8E174_9LAMI M569_05416 24 kDa unknown 0.00000 0.00000 0.00000 0.00000 0.00000 0.00000 0.00000 0.00000 0.00000 26299 0.00000 0.00000 0.00000 0.00000 0.00000
354 true Empty HIG1 domain-containing protein C25B8.07c	mitochondrial OS=Schizosaccharomyces pombe (strain 972 / ATCC 24843) GN=SPAC25B8.07c PE=3 SV=1 YL87_SCHPO SPAC25B8 13 kDa unknown 0.00000 0.00000 0.00000 0.00000 0.00000 0.00000 0.00000 22611 0.00000 0.00000 0.00000 0.00000 0.00000 0.00000 0.00000
355 true Empty Predicted protein OS=Physcomitrella patens subsp. patens GN=PHYPADRAFT_64989 PE=4 SV=1 A9REA9_PHYPA PHYPADRAFT_64989 31 kDa unknown 0.00000 0.00000 0.00000 0.00000 0.00000 0.00000 0.00000 0.00000 0.00000 0.00000 0.00000 0.00000 0.00000 0.00000 2	326
356 true Empty 50S ribosomal protein L14 OS=Finegoldia magna (strain ATCC 29328) GN=rplN PE=3 SV=1 RL14_FINM2 13 kDa unknown 0.00000 0.00000 0.00000 0.00000 0.00000 0.00000 0.00000 0.00000 0.00000 0.00000 2	480.0 0.00000 0.00000 0.00000 0.00000
357 true Empty NAK-type protein kinase OS=Nicotiana tabacum PE=2 SV=1 Q1W203_TOBAC 46 kDa unknown 0.00000 0.00000 3	809.5 0.00000 0.00000 0.00000 0.00000 0.00000 0.00000 0.00000 0.00000 0.00000 0.00000 0.00000 0.00000
358 true Empty ATP synthase subunit beta 1 OS=Rhodobacter sphaeroides (strain ATCC 17029 / ATH 2.4.9) GN=atpD1 PE=3 SV=1 ATPB1_RHOS1 (+2) 50 kDa true unknown 0.00000 0.00000 0.00000 0.00000 0.00000 0.00000 0.00000 0.00000 0.00000 0.00000 0.00000 0.00000 2	241.9 0.00000 0.00000
359 true Empty Uncharacterized protein OS=Musa acuminata subsp. malaccensis PE=4 SV=1 M0RHE9_MUSAM 58 kDa unknown 0.00000 0.00000 0.00000 0.00000 0.00000 0.00000 0.00000 47803 0.00000 0.00000 0.00000 0.00000 0.00000 0.00000 0.00000
360 true Empty Riboflavin biosynthesis protein RibBA OS=Bacillus amyloliquefaciens GN=ribBA PE=3 SV=1 RIBBA_BACAM 44 kDa unknown 0.00000 0.00000 0.00000 0.00000 0.00000 0.00000 0.00000 0.00000 0.00000 0.00000 0.00000 0.00000 20756 0.00000 0.00000
361 true Empty 60S ribosomal protein L27a OS=Encephalitozoon cuniculi (strain GB-M1) GN=RPL27A PE=3 SV=1 RL27A_ENCCU RPL27A 17 kDa unknown 0.00000 1	482.5 0.00000 0.00000 0.00000 0.00000 0.00000 0.00000 0.00000 0.00000 0.00000 0.00000 0.00000 0.00000 0.00000
362 true Empty Uncharacterized protein OS=Musa acuminata subsp. malaccensis PE=3 SV=1 M0SI60_MUSAM 63 kDa unknown 0.00000 0.00000 0.00000 0.00000 0.00000 0.00000 0.00000 0.00000 0.00000 0.00000 0.00000 0.00000 5	579.0 0.00000 0.00000
417 true Empty Peptide chain release factor 1 OS=Treponema pallidum (strain Nichols) GN=prfA PE=3 SV=1 RF1_TREPA (+1) 40 kDa true unknown 0.00000 0.00000 0.00000 0.00000 0.00000 0.00000 0.00000 0.00000 0.00000 0.00000 0.00000 0.00000 2	893.0 0.00000 0.00000
363 true Empty Predicted protein OS=Physcomitrella patens subsp. patens GN=PHYPADRAFT_94062 PE=4 SV=1 A9TKT6_PHYPA PHYPADRAFT_94062 27 kDa unknown 0.00000 0.00000 0.00000 2	140.5 0.00000 0.00000 0.00000 0.00000 0.00000 0.00000 0.00000 0.00000 0.00000 0.00000 0.00000
364 true Empty Glutamate--tRNA ligase OS=Pseudoalteromonas haloplanktis (strain TAC 125) GN=gltX PE=3 SV=1 SYE_PSEHT 56 kDa unknown 0.00000 0.00000 0.00000 0.00000 0.00000 4	853.0 0.00000 0.00000 0.00000 0.00000 0.00000 0.00000 0.00000 0.00000 0.00000
365 true Empty UPF0494 membrane protein PB2B2.07c OS=Schizosaccharomyces pombe (strain 972 / ATCC 24843) GN=SPBPB2B2.07c PE=3 SV=2 YHE7_SCHPO (+2) SPBPB2B2 29 kDa unknown 0.00000 0.00000 0.00000 0.00000 0.00000 0.00000 0.00000 0.00000 0.00000 0.00000 0.00000 0.00000 0.00000 9	085.5 0.00000
368 true Empty Putative uncharacterized protein OS=Selaginella moellendorffii GN=SELMODRAFT_432193 PE=4 SV=1 D8TF95_SELML SELMODRAFT_432193 31 kDa unknown 0.00000 0.00000 0.00000 0.00000 5	636.0 0.00000 0.00000 0.00000 0.00000 0.00000 0.00000 0.00000 0.00000 0.00000 0.00000
369 true Empty Glycosyltransferase OS=Musa acuminata subsp. malaccensis PE=3 SV=1 M0SMQ8_MUSAM 45 kDa true unknown 0.00000 0.00000 0.00000 19480 0.00000 0.00000 0.00000 0.00000 0.00000 0.00000 0.00000 0.00000 0.00000 0.00000 0.00000
370 true Empty Predicted protein OS=Physcomitrella patens subsp. patens GN=PHYPADRAFT_79307 PE=4 SV=1 A9SH03_PHYPA PHYPADRAFT_79307 17 kDa unknown 0.00000 0.00000 0.00000 4	331.0 0.00000 0.00000 0.00000 0.00000 0.00000 0.00000 0.00000 0.00000 0.00000 0.00000 0.00000
371 true Empty Naphthalene 1	2-dioxygenase subunit beta OS=Pseudomonas aeruginosa GN=ndoC PE=3 SV=1 NDOC_PSEAI 23 kDa unknown 0.00000 0.00000 1	124.0 0.00000 0.00000 0.00000 0.00000 0.00000 0.00000 0.00000 0.00000 0.00000 0.00000 0.00000 0.00000
372 true Empty Uncharacterized protein OS=Musa acuminata subsp. malaccensis PE=4 SV=1 M0SUQ7_MUSAM 6 kDa true unknown 0.00000 0.00000 0.00000 0.00000 0.00000 0.00000 0.00000 0.00000 0.00000 738.67 0.00000 0.00000 1	010.7 0.00000 0.00000
373 true Empty R-phycoerythrin subunit beta OS=Prochlorococcus marinus subsp. pastoris (strain CCMP1986 / MED4) GN=cpeB PE=1 SV=1 PHEB_PROMP 20 kDa unknown 0.00000 0.00000 13109 0.00000 0.00000 0.00000 0.00000 0.00000 0.00000 0.00000 0.00000 0.00000 0.00000 0.00000 0.00000
375 true Empty Predicted protein OS=Physcomitrella patens subsp. patens GN=PHYPADRAFT_67687 PE=4 SV=1 A9RLE6_PHYPA PHYPADRAFT_67687 22 kDa unknown 0.00000 0.00000 0.00000 0.00000 0.00000 0.00000 0.00000 0.00000 0.00000 0.00000 0.00000 0.00000 1	334.0 0.00000 0.00000
376 true Empty 10 kDa chaperonin 1 OS=Rhodopseudomonas palustris (strain ATCC BAA-98 / CGA009) GN=groS1 PE=3 SV=1 CH101_RHOPA 11 kDa unknown 0.00000 4	881.5 0.00000 0.00000 0.00000 0.00000 0.00000 0.00000 0.00000 0.00000 0.00000 0.00000 0.00000 0.00000 0.00000
377 true Empty Conserved oligomeric Golgi complex subunit 6 OS=Kluyveromyces lactis (strain ATCC 8585 / CBS 2359 / DSM 70799 / NBRC 1267 / NRRL Y-1140 / WM37) GN=COG6 PE=3 SV=1 COG6_KLULA COG6 89 kDa unknown 0.00000 0.00000 0.00000 4	882.5 0.00000 0.00000 0.00000 0.00000 0.00000 0.00000 0.00000 0.00000 0.00000 0.00000 0.00000
379 true Empty Uncharacterized protein OS=Setaria italica GN=Si002353m.g PE=4 SV=1 K3XKD0_SETIT Si002353m 33 kDa unknown 0.00000 0.00000 0.00000 0.00000 0.00000 0.00000 0.00000 5	041.5 0.00000 0.00000 0.00000 0.00000 0.00000 0.00000 0.00000
380 true Empty Predicted protein OS=Physcomitrella patens subsp. patens GN=PHYPADRAFT_128879 PE=4 SV=1 A9SF92_PHYPA PHYPADRAFT_128879 36 kDa unknown 0.00000 6	687.0 0.00000 0.00000 0.00000 0.00000 0.00000 0.00000 0.00000 0.00000 0.00000 0.00000 0.00000 0.00000 0.00000
381 true Empty Glycine--tRNA ligase beta subunit OS=Rhizobium loti (strain MAFF303099) GN=glyS PE=3 SV=1 SYGB_RHILO 79 kDa true unknown 0.00000 0.00000 0.00000 0.00000 0.00000 0.00000 0.00000 0.00000 0.00000 0.00000 0.00000 0.00000 0.00000 0.00000 0.00000
382 true Empty 50S ribosomal protein L3 OS=Aster yellows witches'-broom phytoplasma (strain AYWB) GN=rplC PE=3 SV=1 RL3_AYWBP (+1) 24 kDa unknown 0.00000 0.00000 15296 0.00000 0.00000 0.00000 0.00000 0.00000 0.00000 0.00000 0.00000 0.00000 0.00000 0.00000 0.00000
384 true Empty Predicted protein OS=Physcomitrella patens subsp. patens GN=PHYPADRAFT_90324 PE=4 SV=1 A9TAU1_PHYPA PHYPADRAFT_90324 25 kDa unknown 0.00000 0.00000 0.00000 0.00000 0.00000 5	955.0 0.00000 0.00000 0.00000 0.00000 0.00000 0.00000 0.00000 0.00000 0.00000
385 true Empty Predicted protein OS=Physcomitrella patens subsp. patens GN=PHYPADRAFT_228446 PE=3 SV=1 A9U6K2_PHYPA PHYPADRAFT_228446 69 kDa unknown 0.00000 0.00000 0.00000 0.00000 0.00000 0.00000 0.00000 0.00000 0.00000 0.00000 1	645.5 0.00000 0.00000 0.00000 0.00000
446 true Empty Multiprotein-bridging factor 1 OS=Emericella nidulans (strain FGSC A4 / ATCC 38163 / CBS 112.46 / NRRL 194 / M139) GN=mbf1 PE=3 SV=1 MBF1_EMENI mbf1 17 kDa true unknown 0.00000 0.00000 0.00000 0.00000 0.00000 0.00000 0.00000 0.00000 0.00000 0.00000 2	742.5 0.00000 0.00000 0.00000 3	440.5
386 true Empty 50S ribosomal protein L10 OS=Serratia proteamaculans (strain 568) GN=rplJ PE=3 SV=1 RL10_SERP5 18 kDa unknown 0.00000 0.00000 0.00000 0.00000 0.00000 0.00000 0.00000 0.00000 0.00000 8	062.5 0.00000 0.00000 0.00000 0.00000 0.00000
387 true Empty DNA damage-inducible protein 1 OS=Neosartorya fumigata (strain ATCC MYA-4609 / Af293 / CBS 101355 / FGSC A1100) GN=ddi1 PE=3 SV=1 DDI1_ASPFU (+1) ddi1 44 kDa true unknown 0.00000 0.00000 0.00000 0.00000 0.00000 0.00000 0.00000 0.00000 0.00000 0.00000 923.00 0.00000 0.00000 0.00000 0.00000
388 true Empty Acetyl-coenzyme A synthetase OS=Methylocella silvestris (strain BL2 / DSM 15510 / NCIMB 13906) GN=acsA PE=3 SV=1 ACSA_METSB 71 kDa true unknown 0.00000 28780 0.00000 0.00000 0.00000 0.00000 0.00000 0.00000 0.00000 0.00000 0.00000 0.00000 0.00000 0.00000 0.00000
390 true Empty 50S ribosomal protein L19 OS=Phenylobacterium zucineum (strain HLK1) GN=rplS PE=3 SV=1 RL19_PHEZH 15 kDa true unknown 0.00000 0.00000 0.00000 0.00000 0.00000 0.00000 0.00000 0.00000 0.00000 0.00000 0.00000 0.00000 0.00000 0.00000 754.98
391 true Empty Mitochondrial import inner membrane translocase subunit TIM16 OS=Saccharomyces cerevisiae (strain ATCC 204508 / S288c) GN=PAM16 PE=1 SV=1 TIM16_YEAST PAM16 16 kDa unknown 0.00000 0.00000 0.00000 0.00000 0.00000 0.00000 0.00000 0.00000 0.00000 0.00000 0.00000 3	745.5 0.00000 0.00000 0.00000
80.1 true Empty Imidazole glycerol phosphate synthase subunit HisF OS=Teredinibacter turnerae (strain ATCC 39867 / T7901) GN=hisF PE=3 SV=1 HIS6_TERTT 28 kDa true unknown 0.00000 0.00000 0.00000 0.00000 0.00000 0.00000 0.00000 0.00000 0.00000 0.00000 1	716.3 0.00000 0.00000 0.00000 0.00000
392 true Empty 50S ribosomal protein L19 OS=Oligotropha carboxidovorans (strain ATCC 49405 / DSM 1227 / OM5) GN=rplS PE=3 SV=1 RL19_OLICO 15 kDa unknown 0.00000 0.00000 0.00000 0.00000 0.00000 0.00000 0.00000 0.00000 0.00000 0.00000 0.00000 0.00000 1	479.5 0.00000 0.00000
393 true Empty Vacuolar protein-sorting-associated protein 25 OS=Schizosaccharomyces pombe (strain 972 / ATCC 24843) GN=vps25 PE=3 SV=1 VPS25_SCHPO vps25 21 kDa unknown 0.00000 0.00000 0.00000 0.00000 0.00000 0.00000 0.00000 0.00000 0.00000 0.00000 0.00000 0.00000 0.00000 0.00000 1	462.5
394 true Empty Sucrose synthase OS=Solanum lycopersicum GN=SUS3 PE=3 SV=1 E0Z1D0_SOLLC SUS3 93 kDa unknown 0.00000 0.00000 0.00000 0.00000 0.00000 0.00000 0.00000 0.00000 0.00000 0.00000 0.00000 0.00000 0.00000 3	497.5 0.00000
396 true Empty Mitochondrial import inner membrane translocase subunit TIM10 OS=Cryptococcus neoformans var. neoformans serotype D (strain B-3501A) GN=TIM10 PE=3 SV=1 TIM10_CRYNB (+1) TIM10 11 kDa unknown 5	073.5 0.00000 0.00000 0.00000 0.00000 0.00000 0.00000 0.00000 0.00000 0.00000 0.00000 0.00000 0.00000 0.00000 0.00000
397 true Empty Predicted protein OS=Physcomitrella patens subsp. patens GN=PHYPADRAFT_163090 PE=4 SV=1 A9S6F2_PHYPA PHYPADRAFT_163090 19 kDa unknown 0.00000 0.00000 0.00000 2	738.0 0.00000 0.00000 0.00000 0.00000 0.00000 0.00000 0.00000 0.00000 0.00000 0.00000 0.00000
398 true Empty Uncharacterized protein OS=Amborella trichopoda GN=AMTR_s00049p00231320 PE=4 SV=1 W1PV03_AMBTC AMTR_s00049p00231320 8 kDa unknown 0.00000 0.00000 0.00000 0.00000 0.00000 0.00000 0.00000 0.00000 0.00000 0.00000 0.00000 0.00000 1	016.5 0.00000 0.00000
399 true Empty Predicted protein OS=Physcomitrella patens subsp. patens GN=PHYPADRAFT_98439 PE=3 SV=1 A9TX31_PHYPA PHYPADRAFT_98439 52 kDa true unknown 0.00000 0.00000 0.00000 0.00000 0.00000 0.00000 0.00000 0.00000 0.00000 0.00000 0.00000 0.00000 0.00000 0.00000 0.00000
400 true Empty Alanine--tRNA ligase OS=Chlorobium luteolum (strain DSM 273 / 2530) GN=alaS PE=3 SV=1 SYA_CHLL7 98 kDa true unknown 0.00000 0.00000 0.00000 0.00000 0.00000 0.00000 0.00000 0.00000 0.00000 0.00000 0.00000 0.00000 0.00000 0.00000 0.00000
401 true Empty Uncharacterized protein OS=Amborella trichopoda GN=AMTR_s01637p00008960 PE=4 SV=1 W1NP05_AMBTC AMTR_s01637p00008960 13 kDa unknown 0.00000 0.00000 0.00000 0.00000 0.00000 0.00000 0.00000 0.00000 0.00000 0.00000 0.00000 0.00000 0.00000 0.00000 6	878
424 true Empty Putative SWI/SNF-related matrix-associated actin-dependent regulator of chromatin subfamily A member 3-like 2 OS=Arabidopsis thaliana GN=At5g22750 PE=2 SV=1 SM3L2_ARATH At5g22750 114 kDa true unknown 0.00000 0.00000 2	556.3 2	293.0 0.00000 0.00000 0.00000 0.00000 0.00000 0.00000 0.00000 2	696.3 0.00000 0.00000 0.00000
402 true Empty Predicted protein OS=Physcomitrella patens subsp. patens GN=PHYPADRAFT_65508 PE=4 SV=1 A9RFQ9_PHYPA PHYPADRAFT_65508 41 kDa unknown 0.00000 0.00000 0.00000 0.00000 0.00000 42587 0.00000 0.00000 75341 0.00000 0.00000 0.00000 0.00000 0.00000 0.00000
403 true Empty UDP-N-acetylmuramate--L-alanine ligase OS=Cupriavidus metallidurans (strain ATCC 43123 / DSM 2839 / NBRC 102507 / CH34) GN=murC PE=3 SV=1 MURC_CUPMC 50 kDa unknown 0.00000 0.00000 0.00000 0.00000 3	110.5 0.00000 0.00000 0.00000 0.00000 0.00000 0.00000 0.00000 0.00000 0.00000 0.00000
404 true Empty Peroxidase OS=Musa acuminata subsp. malaccensis PE=3 SV=1 M0SGE1_MUSAM 33 kDa unknown 0.00000 0.00000 0.00000 0.00000 0.00000 0.00000 0.00000 0.00000 0.00000 0.00000 0.00000 0.00000 0.00000 14935 0.00000
405 true Empty UPF0502 protein PBPRB0676 OS=Photobacterium profundum GN=PBPRB0676 PE=3 SV=1 Y4676_PHOPR 25 kDa unknown 0.00000 0.00000 26351 0.00000 0.00000 0.00000 0.00000 0.00000 0.00000 0.00000 0.00000 0.00000 0.00000 0.00000 0.00000
407 true Empty Predicted protein OS=Physcomitrella patens subsp. patens GN=PHYPADRAFT_62373 PE=4 SV=1 A9RQ53_PHYPA PHYPADRAFT_62373 20 kDa unknown 0.00000 0.00000 4	536.5 0.00000 0.00000 0.00000 0.00000 0.00000 0.00000 0.00000 0.00000 0.00000 0.00000 0.00000 0.00000
408 true Empty 4-hydroxy-3-methylbut-2-enyl diphosphate reductase OS=Chlorobium chlorochromatii (strain CaD3) GN=ispH PE=3 SV=1 ISPH_CHLCH 36 kDa unknown 0.00000 0.00000 0.00000 0.00000 13475 0.00000 0.00000 0.00000 0.00000 0.00000 0.00000 0.00000 0.00000 0.00000 0.00000
409 true Empty Dihydropyrimidinase OS=Lachancea kluyveri (strain ATCC 58438 / CBS 3082 / CCRC 21498 / NBRC 1685 / JCM 7257 / NCYC 543 / NRRL Y-12651) GN=PYD2 PE=1 SV=1 DPYS_LACK1 PYD2 60 kDa unknown 15570 0.00000 0.00000 0.00000 0.00000 0.00000 0.00000 0.00000 0.00000 0.00000 0.00000 0.00000 0.00000 0.00000 0.00000
410 true Empty Probable thioredoxin reductase ARB_06224 OS=Arthroderma benhamiae (strain ATCC MYA-4681 / CBS 112371) GN=ARB_06224 PE=1 SV=1 TRXR_ARTBC ARB_06224 45 kDa unknown 0.00000 0.00000 0.00000 0.00000 0.00000 0.00000 0.00000 0.00000 0.00000 0.00000 4	228.5 0.00000 0.00000 0.00000 0.00000
411 true Empty Glycerol-3-phosphate dehydrogenase [NAD(+)] OS=Hypocrea atroviridis GN=gld1 PE=3 SV=1 GPD_HYPAT gld1 46 kDa unknown 0.00000 0.00000 0.00000 0.00000 0.00000 0.00000 0.00000 0.00000 0.00000 0.00000 0.00000 0.00000 0.00000 0.00000 1	167.5
412 true Empty Proline--tRNA ligase OS=Chlorobium phaeovibrioides (strain DSM 265 / 1930) GN=proS PE=3 SV=1 SYP_CHLPM 55 kDa unknown 0.00000 0.00000 0.00000 0.00000 0.00000 0.00000 0.00000 0.00000 0.00000 0.00000 0.00000 0.00000 2	259.5 0.00000 0.00000
413 true Empty Mitochondrial distribution and morphology protein 12 OS=Candida glabrata (strain ATCC 2001 / CBS 138 / JCM 3761 / NBRC 0622 / NRRL Y-65) GN=MDM12 PE=3 SV=1 MDM12_CANGA MDM12 29 kDa unknown 0.00000 0.00000 0.00000 0.00000 0.00000 0.00000 0.00000 0.00000 0.00000 0.00000 0.00000 3	095.0 0.00000 0.00000 0.00000
414 true Empty UPF0234 protein plu3881 OS=Photorhabdus luminescens subsp. laumondii (strain DSM 15139 / CIP 105565 / TT01) GN=plu3881 PE=3 SV=1 Y3881_PHOLL 18 kDa unknown 0.00000 0.00000 0.00000 3	232.5 0.00000 0.00000 0.00000 0.00000 0.00000 0.00000 925.50 0.00000 0.00000 0.00000 0.00000
415 true Empty Uncharacterized protein OS=Amborella trichopoda GN=AMTR_s00024p00252130 PE=4 SV=1 W1PU39_AMBTC AMTR_s00024p00252130 43 kDa unknown 0.00000 0.00000 0.00000 0.00000 0.00000 0.00000 0.00000 0.00000 0.00000 0.00000 0.00000 5	442.0 0.00000 0.00000 0.00000
416 true Empty Uncharacterized protein OS=Amborella trichopoda GN=AMTR_s00006p00065850 PE=4 SV=1 W1PD50_AMBTC AMTR_s00006p00065850 8 kDa unknown 0.00000 0.00000 0.00000 2	425.0 0.00000 0.00000 0.00000 0.00000 0.00000 0.00000 0.00000 0.00000 0.00000 0.00000 0.00000
418 true Empty Polyamine aminopropyltransferase OS=Alkaliphilus metalliredigens (strain QYMF) GN=speE PE=3 SV=1 SPEE_ALKMQ 33 kDa unknown 0.00000 0.00000 0.00000 0.00000 0.00000 0.00000 0.00000 0.00000 0.00000 0.00000 0.00000 2	352.0 0.00000 0.00000 0.00000
419 true Empty Gamma-glutamyl phosphate reductase OS=Leuconostoc citreum (strain KM20) GN=proA PE=3 SV=1 PROA_LEUCK 45 kDa unknown 0.00000 0.00000 0.00000 0.00000 0.00000 0.00000 0.00000 0.00000 0.00000 0.00000 903.50 0.00000 0.00000 0.00000 0.00000
172.2 true Empty ATP synthase subunit beta OS=Bacteroides vulgatus (strain ATCC 8482 / DSM 1447 / JCM 5826 / NBRC 14291 / NCTC 11154) GN=atpD PE=3 SV=1 ATPB_BACV8 56 kDa true unknown 0.00000 0.00000 0.00000 0.00000 0.00000 0.00000 0.00000 0.00000 0.00000 0.00000 0.00000 0.00000 2	712.6 0.00000 0.00000
420 true Empty ATP synthase epsilon chain	chloroplastic OS=Ananas comosus GN=atpE PE=3 SV=1 A0A0A8K930_ANACO atpE 15 kDa unknown 0.00000 0.00000 0.00000 0.00000 0.00000 0.00000 0.00000 0.00000 0.00000 0.00000 0.00000 2	453.0 0.00000 0.00000 0.00000
421 true Empty Deoxyribose-phosphate aldolase OS=Finegoldia magna (strain ATCC 29328) GN=deoC PE=3 SV=1 DEOC_FINM2 23 kDa true unknown 3	292.0 0.00000 0.00000 0.00000 0.00000 0.00000 0.00000 0.00000 0.00000 0.00000 0.00000 0.00000 0.00000 0.00000 0.00000
171.1 true Empty 50S ribosomal protein L7/L12 OS=Campylobacter jejuni subsp. jejuni serotype O:6 (strain 81116 / NCTC 11828) GN=rplL PE=3 SV=1 RL7_CAMJ8 (+4) 13 kDa true unknown 0.00000 0.00000 0.00000 0.00000 2	572.9 0.00000 0.00000 0.00000 0.00000 0.00000 0.00000 0.00000 0.00000 0.00000 0.00000
422 true Empty Orotidine 5'-phosphate decarboxylase OS=Clostridium perfringens (strain ATCC 13124 / DSM 756 / JCM 1290 / NCIMB 6125 / NCTC 8237 / Type A) GN=pyrF PE=3 SV=1 PYRF_CLOP1 (+1) 32 kDa unknown 0.00000 0.00000 0.00000 0.00000 0.00000 0.00000 0.00000 3	350.0 0.00000 0.00000 0.00000 0.00000 0.00000 0.00000 0.00000
425 true Empty Predicted protein OS=Physcomitrella patens subsp. patens GN=PHYPADRAFT_93885 PE=4 SV=1 A9TKC0_PHYPA PHYPADRAFT_93885 14 kDa true unknown 2	811.9 0.00000 0.00000 0.00000 0.00000 0.00000 0.00000 0.00000 0.00000 0.00000 0.00000 0.00000 0.00000 0.00000 0.00000
426 true Empty Putative uncharacterized protein OS=Selaginella moellendorffii GN=SELMODRAFT_430858 PE=4 SV=1 D8TAR4_SELML SELMODRAFT_430858 48 kDa unknown 0.00000 0.00000 0.00000 0.00000 0.00000 0.00000 0.00000 0.00000 0.00000 0.00000 0.00000 0.00000 2	779.5 0.00000 0.00000
427 true Empty Lanosterol 14-alpha demethylase erg11 OS=Schizosaccharomyces pombe (strain 972 / ATCC 24843) GN=erg11 PE=1 SV=1 CP51_SCHPO erg11 56 kDa unknown 0.00000 860.00 0.00000 0.00000 0.00000 0.00000 0.00000 0.00000 0.00000 0.00000 0.00000 0.00000 0.00000 0.00000 0.00000
428 true Empty 54S ribosomal protein L27	mitochondrial OS=Schizosaccharomyces pombe (strain 972 / ATCC 24843) GN=mrpl27 PE=3 SV=1 RM27_SCHPO mrpl27 10 kDa unknown 0.00000 0.00000 0.00000 0.00000 0.00000 0.00000 0.00000 0.00000 1	055.0 0.00000 0.00000 0.00000 0.00000 0.00000 0.00000
429 true Empty Predicted protein OS=Physcomitrella patens subsp. patens GN=PHYPADRAFT_102826 PE=4 SV=1 A9U5U3_PHYPA PHYPADRAFT_102826 27 kDa unknown 0.00000 2	941.5 0.00000 0.00000 0.00000 0.00000 0.00000 0.00000 0.00000 0.00000 0.00000 0.00000 0.00000 0.00000 0.00000
430 true Empty Arginine--tRNA ligase OS=Xanthobacter autotrophicus (strain ATCC BAA-1158 / Py2) GN=argS PE=3 SV=1 SYR_XANP2 64 kDa unknown 0.00000 0.00000 0.00000 3	730.0 0.00000 0.00000 0.00000 0.00000 0.00000 0.00000 0.00000 0.00000 0.00000 0.00000 0.00000
431 true Empty Serine--tRNA ligase OS=Helicobacter acinonychis (strain Sheeba) GN=serS PE=3 SV=1 SYS_HELAH 47 kDa unknown 0.00000 0.00000 0.00000 0.00000 0.00000 3	272.5 0.00000 0.00000 0.00000 0.00000 0.00000 0.00000 0.00000 0.00000 0.00000
432 true Empty DNA mismatch repair protein MutS OS=Erythrobacter litoralis (strain HTCC2594) GN=mutS PE=3 SV=1 MUTS_ERYLH 94 kDa unknown 0.00000 0.00000 0.00000 4	470.0 0.00000 0.00000 0.00000 0.00000 0.00000 0.00000 0.00000 0.00000 0.00000 0.00000 0.00000
433 true Empty Chaperone protein DnaJ OS=Yersinia enterocolitica serotype O:8 / biotype 1B (strain NCTC 13174 / 8081) GN=dnaJ PE=3 SV=1 DNAJ_YERE8 41 kDa unknown 0.00000 0.00000 0.00000 0.00000 0.00000 0.00000 0.00000 0.00000 0.00000 0.00000 0.00000 0.00000 1	452.0 0.00000 0.00000
434 true Empty Uncharacterized protein OS=Amborella trichopoda GN=AMTR_s00096p00033630 PE=4 SV=1 W1P3X6_AMBTC AMTR_s00096p00033630 24 kDa unknown 0.00000 0.00000 0.00000 0.00000 0.00000 0.00000 0.00000 0.00000 0.00000 0.00000 0.00000 0.00000 0.00000 0.00000 1	375
435 true Empty Glutamyl-tRNA reductase OS=Desulfovibrio magneticus (strain ATCC 700980 / DSM 13731 / RS-1) GN=hemA PE=3 SV=1 HEM1_DESMR 50 kDa unknown 0.00000 0.00000 0.00000 0.00000 0.00000 0.00000 0.00000 0.00000 0.00000 0.00000 0.00000 1	657.0 0.00000 0.00000 0.00000
437 true Empty 54S ribosomal protein L13	mitochondrial OS=Saccharomyces cerevisiae (strain ATCC 204508 / S288c) GN=MRPL13 PE=1 SV=2 RM13_YEAST MRPL13 30 kDa unknown 0.00000 0.00000 0.00000 0.00000 0.00000 0.00000 1	720.5 0.00000 0.00000 0.00000 0.00000 0.00000 0.00000 0.00000 0.00000
438 true Empty Carbamoyl-phosphate synthase large chain	C-terminal section OS=Aquifex aeolicus (strain VF5) GN=carB2 PE=3 SV=1 CARB2_AQUAE 60 kDa true unknown 0.00000 0.00000 2	478.7 0.00000 0.00000 0.00000 0.00000 0.00000 0.00000 0.00000 0.00000 0.00000 0.00000 0.00000 0.00000
439 true Empty Ribosome maturation factor RimM OS=Bdellovibrio bacteriovorus (strain ATCC 15356 / DSM 50701 / NCIB 9529 / HD100) GN=rimM PE=3 SV=1 RIMM_BDEBA 20 kDa unknown 0.00000 0.00000 0.00000 0.00000 2	958.5 0.00000 0.00000 0.00000 0.00000 0.00000 0.00000 0.00000 0.00000 0.00000 0.00000
440 true Empty Putative uncharacterized protein OS=Selaginella moellendorffii GN=SELMODRAFT_182516 PE=4 SV=1 D8STI3_SELML SELMODRAFT_182516 79 kDa unknown 0.00000 0.00000 0.00000 0.00000 0.00000 0.00000 0.00000 0.00000 0.00000 0.00000 0.00000 2	837.0 0.00000 0.00000 0.00000
441 true Empty Subtilisin-like protease CPC735_031240 OS=Coccidioides posadasii (strain C735) GN=CPC735_031240 PE=3 SV=1 SUB8_COCP7 CPC735_031240 53 kDa unknown 0.00000 0.00000 0.00000 0.00000 0.00000 0.00000 0.00000 0.00000 0.00000 0.00000 0.00000 0.00000 0.00000 0.00000 3	543
442 true Empty PHD finger protein ING OS=Amborella trichopoda GN=AMTR_s00004p00078450 PE=3 SV=1 W1NEG4_AMBTC AMTR_s00004p00078450 29 kDa unknown 0.00000 0.00000 0.00000 5	900.0 0.00000 0.00000 0.00000 0.00000 0.00000 0.00000 0.00000 0.00000 0.00000 0.00000 0.00000
443 true Empty Isoleucine--tRNA ligase OS=Chlorobium tepidum (strain ATCC 49652 / DSM 12025 / NBRC 103806 / TLS) GN=ileS PE=3 SV=1 SYI_CHLTE 124 kDa unknown 0.00000 0.00000 0.00000 0.00000 1	894.0 0.00000 0.00000 0.00000 0.00000 0.00000 0.00000 0.00000 0.00000 0.00000 0.00000
444 true Empty Predicted protein (Fragment) OS=Physcomitrella patens subsp. patens GN=PHYPADRAFT_128968 PE=3 SV=1 A9SFC9_PHYPA PHYPADRAFT_128968 29 kDa unknown 0.00000 0.00000 0.00000 0.00000 0.00000 0.00000 0.00000 0.00000 0.00000 0.00000 0.00000 0.00000 0.00000 0.00000 1	57
445 true Empty Putative uncharacterized protein OS=Selaginella moellendorffii GN=SELMODRAFT_428159 PE=4 SV=1 D8T1Y1_SELML SELMODRAFT_428159 41 kDa unknown 0.00000 0.00000 0.00000 0.00000 2	649.5 0.00000 0.00000 0.00000 0.00000 0.00000 0.00000 0.00000 0.00000 0.00000 0.00000
12.8 true Empty Uncharacterized protein OS=Musa acuminata subsp. malaccensis PE=3 SV=1 M0STN7_MUSAM 42 kDa true unknown 0.00000 0.00000 1	147.7 0.00000 0.00000 0.00000 0.00000 0.00000 0.00000 0.00000 0.00000 0.00000 0.00000 0.00000 0.00000
4.35 true Empty 60 kDa chaperonin 2 OS=Azorhizobium caulinodans (strain ATCC 43989 / DSM 5975 / JCM 20966 / NBRC 14845 / NCIMB 13405 / ORS 571) GN=groL2 PE=3 SV=1 CH602_AZOC5 57 kDa true unknown 0.00000 0.00000 0.00000 0.00000 0.00000 0.00000 0.00000 0.00000 0.00000 0.00000 0.00000 0.00000 0.00000 5	692.2 0.00000
4.36 true Empty 60 kDa chaperonin OS=Burkholderia thailandensis GN=groL PE=3 SV=1 CH60_BURTH 57 kDa true unknown 0.00000 0.00000 0.00000 0.00000 0.00000 0.00000 0.00000 0.00000 0.00000 0.00000 0.00000 0.00000 0.00000 0.00000 0.00000
1.42 true Empty Predicted protein OS=Physcomitrella patens subsp. patens GN=PHYPADRAFT_80441 PE=4 SV=1 A9SJZ7_PHYPA PHYPADRAFT_80441 39 kDa true unknown 0.00000 0.00000 0.00000 0.00000 0.00000 0.00000 0.00000 0.00000 0.00000 0.00000 1	096.2 0.00000 0.00000 0.00000 0.00000
197.1 true Empty 10 kDa chaperonin OS=Prochlorococcus marinus (strain NATL1A) GN=groS PE=3 SV=1 CH10_PROM1 (+8) 11 kDa true unknown 0.00000 0.00000 0.00000 0.00000 0.00000 0.00000 0.00000 0.00000 0.00000 0.00000 0.00000 0.00000 0.00000 0.00000 0.00000
62.1 true Empty 10 kDa chaperonin OS=Bartonella tribocorum (strain CIP 105476 / IBS 506) GN=groS PE=3 SV=1 CH10_BART1 11 kDa true unknown 0.00000 0.00000 0.00000 0.00000 0.00000 5	193.9 0.00000 0.00000 0.00000 0.00000 0.00000 0.00000 0.00000 0.00000 0.00000
24.3 true Empty 50S ribosomal protein L7/L12 OS=Anaeromyxobacter dehalogenans (strain 2CP-1 / ATCC BAA-258) GN=rplL PE=3 SV=1 RL7_ANAD2 (+15) 13 kDa true unknown 0.00000 9	467.1 0.00000 0.00000 0.00000 0.00000 0.00000 0.00000 0.00000 0.00000 0.00000 0.00000 0.00000 0.00000 0.00000
62.2 true Empty 10 kDa chaperonin 2 OS=Rhizobium loti (strain MAFF303099) GN=groS2 PE=3 SV=1 CH102_RHILO 11 kDa true unknown 0.00000 0.00000 0.00000 0.00000 0.00000 0.00000 0.00000 0.00000 0.00000 0.00000 0.00000 7	246.5 0.00000 0.00000 0.00000
62.3 true Empty 10 kDa chaperonin 4 OS=Rhizobium loti (strain MAFF303099) GN=groS4 PE=3 SV=1 CH104_RHILO (+9) 11 kDa true unknown 16544 0.00000 0.00000 0.00000 0.00000 0.00000 0.00000 0.00000 0.00000 0.00000 0.00000 0.00000 0.00000 0.00000 0.00000
24.4 true Empty 50S ribosomal protein L7/L12 OS=Neisseria gonorrhoeae (strain ATCC 700825 / FA 1090) GN=rplL PE=3 SV=1 RL7_NEIG1 (+9) 13 kDa true unknown 0.00000 15860 0.00000 0.00000 0.00000 0.00000 0.00000 0.00000 0.00000 0.00000 0.00000 0.00000 0.00000 0.00000 0.00000
62.4 true Empty 10 kDa chaperonin 1 OS=Bradyrhizobium diazoefficiens (strain JCM 10833 / IAM 13628 / NBRC 14792 / USDA 110) GN=groS1 PE=2 SV=1 CH101_BRADU 11 kDa true unknown 0.00000 0.00000 0.00000 0.00000 0.00000 12447 0.00000 0.00000 0.00000 0.00000 0.00000 0.00000 0.00000 0.00000 0.00000
59.1 true Empty Chaperone protein DnaK OS=Rhodopseudomonas palustris (strain BisB18) GN=dnaK PE=3 SV=1 DNAK_RHOPB 68 kDa true unknown 7	019.8 2	023.4 0.00000 0.00000 0.00000 0.00000 0.00000 0.00000 0.00000 0.00000 0.00000 0.00000 0.00000 0.00000 0.00000
1.43 true Empty Predicted protein OS=Physcomitrella patens subsp. patens GN=PHYPADRAFT_82099 PE=4 SV=1 A9SPA3_PHYPA PHYPADRAFT_82099 50 kDa true unknown 0.00000 0.00000 0.00000 0.00000 0.00000 0.00000 0.00000 0.00000 0.00000 0.00000 0.00000 1	411.1 0.00000 0.00000 0.00000
81.1 true Empty Putative uncharacterized protein OS=Selaginella moellendorffii GN=SELMODRAFT_100482 PE=4 SV=1 D8RRZ3_SELML SELMODRAFT_100482 57 kDa true unknown 0.00000 0.00000 0.00000 0.00000 0.00000 0.00000 0.00000 0.00000 0.00000 0.00000 0.00000 0.00000 0.00000 0.00000 5	321.4
1.44 true Empty Predicted protein OS=Physcomitrella patens subsp. patens GN=PHYPADRAFT_70173 PE=4 SV=1 A9RT12_PHYPA PHYPADRAFT_70173 23 kDa true unknown 0.00000 993.76 57208 0.00000 0.00000 0.00000 0.00000 0.00000 0.00000 0.00000 0.00000 0.00000 0.00000 0.00000 0.00000
1.45 true Empty Predicted protein OS=Physcomitrella patens subsp. patens GN=PHYPADRAFT_95212 PE=4 SV=1 A9TNW8_PHYPA PHYPADRAFT_95212 92 kDa true unknown 0.00000 3	189.3 0.00000 0.00000 0.00000 0.00000 0.00000 0.00000 0.00000 0.00000 0.00000 0.00000 0.00000 0.00000 0.00000
1.46 true Empty Predicted protein OS=Physcomitrella patens subsp. patens GN=PHYPADRAFT_67372 PE=4 SV=1 A9RKI3_PHYPA PHYPADRAFT_67372 26 kDa true unknown 0.00000 0.00000 0.00000 2	107.0 0.00000 0.00000 0.00000 0.00000 0.00000 0.00000 0.00000 0.00000 0.00000 0.00000 0.00000
10.4 true Empty ATP synthase subunit alpha OS=Mycoplasma mycoides subsp. mycoides SC (strain PG1) GN=atpA PE=3 SV=1 ATPA_MYCMS 58 kDa true unknown 0.00000 0.00000 0.00000 1	829.7 0.00000 0.00000 0.00000 0.00000 0.00000 0.00000 0.00000 0.00000 0.00000 0.00000 0.00000
333.1 true Empty Putative uncharacterized protein OS=Selaginella moellendorffii GN=SELMODRAFT_440044 PE=4 SV=1 D8R9P9_SELML (+1) SELMODRAFT_440044 51 kDa true unknown 0.00000 0.00000 0.00000 0.00000 0.00000 0.00000 0.00000 0.00000 0.00000 0.00000 0.00000 0.00000 8	508.0 0.00000 0.00000
332.1 true Empty Probable cytosol aminopeptidase OS=Dinoroseobacter shibae (strain DSM 16493 / NCIMB 14021 / DFL 12) GN=pepA PE=3 SV=1 AMPA_DINSH 51 kDa true unknown 0.00000 0.00000 0.00000 0.00000 0.00000 0.00000 0.00000 0.00000 0.00000 0.00000 0.00000 0.00000 0.00000 0.00000 0.00000
447 true Empty Myb family transcription factor APL OS=Gossypium arboreum GN=F383_10774 PE=4 SV=1 A0A0B0NIP7_GOSAR F383_10774 33 kDa true unknown 0.00000 5	343.4 0.00000 0.00000 0.00000 0.00000 0.00000 0.00000 0.00000 0.00000 0.00000 0.00000 0.00000 0.00000 0.00000
448 true Empty Dimethlysulfonioproprionate lyase DddW OS=Ruegeria pomeroyi (strain ATCC 700808 / DSM 15171 / DSS-3) GN=dddW PE=1 SV=1 DDDW_RUEPO 16 kDa unknown 0.00000 0.00000 0.00000 0.00000 0.00000 5	070.0 0.00000 0.00000 0.00000 0.00000 0.00000 0.00000 0.00000 0.00000 0.00000
449 true Empty Putative uncharacterized protein OS=Selaginella moellendorffii GN=SELMODRAFT_422556 PE=4 SV=1 D8SIT5_SELML SELMODRAFT_422556 54 kDa unknown 0.00000 0.00000 0.00000 0.00000 0.00000 0.00000 0.00000 0.00000 44261 0.00000 0.00000 0.00000 0.00000 0.00000 0.00000
450 true Empty Probable cytosol aminopeptidase OS=Actinobacillus succinogenes (strain ATCC 55618 / 130Z) GN=pepA PE=3 SV=1 AMPA_ACTSZ 52 kDa unknown 0.00000 0.00000 0.00000 0.00000 0.00000 0.00000 0.00000 0.00000 0.00000 0.00000 0.00000 3	071.0 0.00000 0.00000 0.00000
451 true Empty NADH dehydrogenase [ubiquinone] 1 alpha subcomplex subunit 4 homolog OS=Schizosaccharomyces pombe (strain 972 / ATCC 24843) GN=SPCC417.16 PE=3 SV=1 NDUA4_SCHPO SPCC417 6 kDa unknown 75045 0.00000 0.00000 2	459.0 0.00000 0.00000 0.00000 0.00000 0.00000 0.00000 0.00000 0.00000 0.00000 0.00000 0.00000
452 true Empty Predicted protein OS=Physcomitrella patens subsp. patens GN=PHYPADRAFT_178211 PE=4 SV=1 A9RUC1_PHYPA PHYPADRAFT_178211 34 kDa unknown 0.00000 0.00000 0.00000 0.00000 0.00000 3	659.0 0.00000 0.00000 0.00000 0.00000 0.00000 0.00000 0.00000 0.00000 0.00000
334.1 true Empty Hydroxyethylthiazole kinase OS=Bacillus cereus (strain B4264) GN=thiM PE=3 SV=1 THIM_BACC4 28 kDa true unknown 0.00000 0.00000 0.00000 1	777.9 0.00000 0.00000 0.00000 0.00000 0.00000 0.00000 0.00000 0.00000 0.00000 0.00000 0.00000
453 true Empty Uncharacterized protein OS=Amborella trichopoda GN=AMTR_s00144p00049590 PE=4 SV=1 W1P9K5_AMBTC AMTR_s00144p00049590 14 kDa unknown 0.00000 0.00000 0.00000 0.00000 0.00000 0.00000 0.00000 16169 0.00000 0.00000 0.00000 0.00000 0.00000 0.00000 0.00000
454 true Empty Predicted protein OS=Physcomitrella patens subsp. patens GN=PHYPADRAFT_75963 PE=4 SV=1 A9S8G6_PHYPA PHYPADRAFT_75963 16 kDa true unknown 0.00000 0.00000 10736 0.00000 0.00000 0.00000 0.00000 0.00000 0.00000 0.00000 0.00000 0.00000 0.00000 0.00000 0.00000
146.1 true Empty Deoxyribose-phosphate aldolase OS=Clostridium novyi (strain NT) GN=deoC PE=3 SV=1 DEOC_CLONN 24 kDa true unknown 0.00000 0.00000 0.00000 0.00000 0.00000 0.00000 0.00000 0.00000 0.00000 0.00000 0.00000 0.00000 0.00000 0.00000 0.00000
455 true Empty Ribosomal RNA large subunit methyltransferase E OS=Bordetella pertussis (strain Tohama I / ATCC BAA-589 / NCTC 13251) GN=rlmE PE=3 SV=1 RLME_BORPE 23 kDa unknown 0.00000 0.00000 0.00000 0.00000 0.00000 0.00000 0.00000 0.00000 0.00000 0.00000 52220 0.00000 0.00000 0.00000 0.00000
456 true Empty UPF0102 protein aq_041 OS=Aquifex aeolicus (strain VF5) GN=aq_041 PE=3 SV=1 Y041_AQUAE 12 kDa unknown 0.00000 0.00000 32734 0.00000 0.00000 0.00000 0.00000 0.00000 0.00000 0.00000 0.00000 0.00000 0.00000 0.00000 0.00000
457 true Empty Phosphoenolpyruvate carboxykinase [ATP] OS=Shewanella piezotolerans (strain WP3 / JCM 13877) GN=pckA PE=3 SV=1 PCKA_SHEPW 56 kDa unknown 0.00000 0.00000 0.00000 0.00000 0.00000 0.00000 0.00000 0.00000 0.00000 5	409.0 0.00000 0.00000 0.00000 0.00000 0.00000
458 true Empty 30S ribosomal protein S11 OS=Cupriavidus metallidurans (strain ATCC 43123 / DSM 2839 / NBRC 102507 / CH34) GN=rpsK PE=3 SV=1 RS11_CUPMC (+3) 14 kDa true unknown 0.00000 0.00000 0.00000 0.00000 0.00000 0.00000 0.00000 0.00000 0.00000 3	860.0 0.00000 0.00000 0.00000 0.00000 0.00000
459 true Empty Predicted protein (Fragment) OS=Physcomitrella patens subsp. patens GN=PHYPADRAFT_208965 PE=4 SV=1 A9S5X5_PHYPA PHYPADRAFT_208965 48 kDa unknown 0.00000 0.00000 13558 0.00000 0.00000 0.00000 0.00000 0.00000 0.00000 0.00000 0.00000 0.00000 0.00000 0.00000 0.00000
460 true Empty Pyridoxine 5'-phosphate synthase OS=Rhodopseudomonas palustris (strain ATCC BAA-98 / CGA009) GN=pdxJ PE=3 SV=1 PDXJ_RHOPA 27 kDa unknown 0.00000 0.00000 0.00000 0.00000 6	397.0 0.00000 0.00000 0.00000 0.00000 0.00000 0.00000 0.00000 0.00000 0.00000 0.00000
461 true Empty UPF0342 protein SERP1381 OS=Staphylococcus epidermidis (strain ATCC 35984 / RP62A) GN=SERP1381 PE=3 SV=1 Y1381_STAEQ 13 kDa unknown 0.00000 6	616.0 0.00000 0.00000 0.00000 0.00000 0.00000 0.00000 0.00000 0.00000 0.00000 0.00000 0.00000 0.00000 0.00000
462 true Empty V0 assembly protein 1 OS=Saccharomyces cerevisiae (strain ATCC 204508 / S288c) GN=VOA1 PE=1 SV=1 VOA1_YEAST VOA1 30 kDa unknown 0.00000 0.00000 0.00000 0.00000 2	533.0 0.00000 0.00000 0.00000 0.00000 0.00000 0.00000 0.00000 0.00000 0.00000 0.00000
261.1 true Empty Predicted protein OS=Physcomitrella patens subsp. patens GN=PHYPADRAFT_90644 PE=4 SV=1 A9TBM6_PHYPA PHYPADRAFT_90644 27 kDa true unknown 0.00000 0.00000 0.00000 0.00000 0.00000 0.00000 0.00000 0.00000 0.00000 0.00000 0.00000 0.00000 0.00000 0.00000 1	571.3
463 true Empty Methyltransferase OS=Selaginella moellendorffii GN=SMT2-2 PE=3 SV=1 D8S639_SELML SMT2-2 39 kDa unknown 0.00000 0.00000 0.00000 5	780.0 0.00000 0.00000 0.00000 0.00000 0.00000 0.00000 0.00000 0.00000 0.00000 0.00000 0.00000
464 true Empty Putative uncharacterized protein (Fragment) OS=Selaginella moellendorffii GN=SELMODRAFT_138607 PE=4 SV=1 D8TFS6_SELML SELMODRAFT_138607 7 kDa unknown 0.00000 0.00000 0.00000 2	850.0 0.00000 0.00000 0.00000 0.00000 0.00000 0.00000 0.00000 0.00000 0.00000 0.00000 0.00000
465 true Empty RuvB-like helicase 1 OS=Yarrowia lipolytica (strain CLIB 122 / E 150) GN=RVB1 PE=3 SV=1 RUVB1_YARLI RVB1 50 kDa unknown 0.00000 0.00000 0.00000 0.00000 0.00000 0.00000 0.00000 37262 0.00000 0.00000 0.00000 0.00000 0.00000 0.00000 0.00000
466 true Empty Putative uncharacterized protein OS=Selaginella moellendorffii GN=SELMODRAFT_420371 PE=4 SV=1 D8SBT0_SELML SELMODRAFT_420371 25 kDa unknown 0.00000 14409 0.00000 0.00000 0.00000 0.00000 0.00000 0.00000 0.00000 0.00000 0.00000 0.00000 0.00000 0.00000 0.00000
467 true Empty 50S ribosomal protein L17 OS=Parabacteroides distasonis (strain ATCC 8503 / DSM 20701 / NCTC 11152) GN=rplQ PE=3 SV=1 RL17_PARD8 18 kDa unknown 0.00000 0.00000 0.00000 0.00000 0.00000 0.00000 0.00000 0.00000 0.00000 0.00000 0.00000 0.00000 0.00000 0.00000 4	892
468 true Empty Adenylosuccinate synthetase OS=Frankia alni (strain ACN14a) GN=purA PE=3 SV=1 PURA_FRAAA (+1) 46 kDa unknown 0.00000 0.00000 0.00000 0.00000 0.00000 0.00000 0.00000 0.00000 0.00000 0.00000 3	269.0 0.00000 0.00000 0.00000 0.00000
481 true Empty Peptide chain release factor 1 OS=Desulfococcus oleovorans (strain DSM 6200 / Hxd3) GN=prfA PE=3 SV=1 RF1_DESOH 40 kDa true unknown 0.00000 10804 0.00000 0.00000 0.00000 0.00000 0.00000 0.00000 0.00000 0.00000 0.00000 0.00000 0.00000 0.00000 0.00000
469 true Empty Anti-lipopolysaccharide factor OS=Limulus polyphemus PE=1 SV=1 ALPS_LIMPO (+1) 12 kDa unknown 0.00000 2	532.0 0.00000 0.00000 0.00000 0.00000 0.00000 0.00000 0.00000 0.00000 0.00000 0.00000 0.00000 0.00000 0.00000
470 true Empty Predicted protein (Fragment) OS=Physcomitrella patens subsp. patens GN=PHYPADRAFT_72278 PE=4 SV=1 A9RYW3_PHYPA PHYPADRAFT_72278 29 kDa unknown 0.00000 0.00000 9	021.0 0.00000 0.00000 0.00000 0.00000 0.00000 0.00000 0.00000 0.00000 0.00000 0.00000 0.00000 0.00000
471 true Empty Predicted protein OS=Physcomitrella patens subsp. patens GN=PHYPADRAFT_167168 PE=4 SV=1 A9SYR9_PHYPA PHYPADRAFT_167168 35 kDa unknown 0.00000 0.00000 0.00000 0.00000 0.00000 0.00000 0.00000 0.00000 0.00000 0.00000 0.00000 0.00000 8	403.0 0.00000 0.00000
472 true Empty Uncharacterized protein OS=Amborella trichopoda GN=AMTR_s00048p00085290 PE=4 SV=1 U5D2B7_AMBTC AMTR_s00048p00085290 52 kDa unknown 6	076.0 0.00000 0.00000 0.00000 0.00000 0.00000 0.00000 0.00000 0.00000 0.00000 0.00000 0.00000 0.00000 0.00000 0.00000
473 true Empty 30S ribosomal protein S20 OS=Haemophilus ducreyi (strain 35000HP / ATCC 700724) GN=rpsT PE=3 SV=1 RS20_HAEDU 10 kDa true unknown 0.00000 0.00000 0.00000 3	152.5 0.00000 0.00000 0.00000 0.00000 0.00000 0.00000 0.00000 0.00000 0.00000 0.00000 0.00000
474 true Empty Metacaspase-1B OS=Neosartorya fischeri (strain ATCC 1020 / DSM 3700 / FGSC A1164 / NRRL 181) GN=casB PE=3 SV=1 MCA1B_NEOFI casB 46 kDa unknown 0.00000 0.00000 23324 0.00000 0.00000 0.00000 0.00000 0.00000 0.00000 0.00000 0.00000 0.00000 0.00000 0.00000 0.00000
475 true Empty 60S acidic ribosomal protein P1-A OS=Candida albicans (strain SC5314 / ATCC MYA-2876) GN=RPP1A PE=3 SV=1 RLA1_CANAL RPP1A 11 kDa unknown 0.00000 0.00000 0.00000 0.00000 0.00000 0.00000 0.00000 0.00000 0.00000 0.00000 0.00000 0.00000 4	038.0 0.00000 0.00000
476 true Empty Putative uncharacterized protein OS=Selaginella moellendorffii GN=SELMODRAFT_412026 PE=4 SV=1 D8RJT7_SELML SELMODRAFT_412026 24 kDa unknown 0.00000 0.00000 0.00000 0.00000 0.00000 0.00000 0.00000 0.00000 11029 0.00000 0.00000 0.00000 0.00000 0.00000 0.00000
477 true Empty ATP-dependent protease ATPase subunit HslU OS=Wigglesworthia glossinidia brevipalpis GN=hslU PE=3 SV=2 HSLU_WIGBR 50 kDa unknown 0.00000 6	190.0 0.00000 0.00000 0.00000 0.00000 0.00000 0.00000 0.00000 0.00000 0.00000 0.00000 0.00000 0.00000 0.00000
1.47 true Empty Predicted protein OS=Physcomitrella patens subsp. patens GN=PHYPADRAFT_68784 PE=4 SV=1 A9RPH0_PHYPA PHYPADRAFT_68784 23 kDa true unknown 0.00000 1	663.1 0.00000 0.00000 0.00000 0.00000 0.00000 0.00000 0.00000 0.00000 0.00000 0.00000 0.00000 0.00000 0.00000
478 true Empty Glycine--tRNA ligase beta subunit OS=Listeria welshimeri serovar 6b (strain ATCC 35897 / DSM 20650 / SLCC5334) GN=glyS PE=3 SV=1 SYGB_LISW6 79 kDa unknown 0.00000 0.00000 0.00000 0.00000 0.00000 0.00000 76613 0.00000 0.00000 0.00000 0.00000 0.00000 0.00000 0.00000 0.00000
479 true Empty Putative uncharacterized protein CYP797B4 OS=Selaginella moellendorffii GN=CYP797B4 PE=3 SV=1 D8RCM1_SELML CYP797B4 21 kDa unknown 0.00000 0.00000 0.00000 35321 0.00000 0.00000 0.00000 0.00000 0.00000 0.00000 0.00000 0.00000 0.00000 0.00000 0.00000
480 true Empty Probable kinetochore protein SPC24 OS=Ashbya gossypii (strain ATCC 10895 / CBS 109.51 / FGSC 9923 / NRRL Y-1056) GN=SPC24 PE=3 SV=1 SPC24_ASHGO SPC24 23 kDa unknown 0.00000 0.00000 0.00000 0.00000 1	910.0 0.00000 0.00000 0.00000 0.00000 0.00000 0.00000 0.00000 0.00000 0.00000 0.00000
482 true Empty Putative uncharacterized protein OS=Selaginella moellendorffii GN=SELMODRAFT_414116 PE=4 SV=1 D8RRP6_SELML (+1) SELMODRAFT_414116 43 kDa unknown 0.00000 0.00000 0.00000 0.00000 0.00000 0.00000 0.00000 0.00000 4	210.0 0.00000 0.00000 0.00000 0.00000 0.00000 0.00000
483 true Empty Putative uncharacterized protein OS=Selaginella moellendorffii GN=SELMODRAFT_430901 PE=3 SV=1 D8TAW5_SELML SELMODRAFT_430901 24 kDa unknown 0.00000 0.00000 0.00000 0.00000 0.00000 0.00000 0.00000 0.00000 0.00000 0.00000 0.00000 0.00000 23326 0.00000 0.00000
484 true Empty Predicted protein OS=Physcomitrella patens subsp. patens GN=PHYPADRAFT_67546 PE=4 SV=1 A9RL11_PHYPA PHYPADRAFT_67546 46 kDa true unknown 0.00000 0.00000 0.00000 0.00000 0.00000 0.00000 0.00000 0.00000 0.00000 0.00000 0.00000 0.00000 0.00000 0.00000 924.00
END OF FILE
