# Supplementary material
Source: MDPI journal article supplement (https://www.mdpi.com/1999-4907/12/9/1158)
Supplement: s1 [file s1 › Table S2. Enzymes Abundance.xlsx]

## Sheet: Enzymes Abundance
Table S2. Enzymes abundance matrix used to construct the Figure 5. Each bold number in the heading is a top-level EC number, followed by a second-level EC number. The values correspond to the relative abundance of each EC second-level to the total of the correspondent top-level EC number.
Rehabilitation Stage	1.1	1.11	1.12	1.13	1.14	1.17	1.18	1.2	1.21	1.3	1.4	1.5	1.6	1.7	1.8	1.9	1.97	2.1	2.2	2.3	2.4	2.5	2.6	2.7	2.8	3.1	3.2	3.4	3.5	3.6	4.1	4.2	4.3	4.4	4.6	4.99	5.1	5.2	5.3	5.4	5.6	5.99	6.1	6.2	6.3	6.5	6.6	7.1	7.2
NR	33.3333	0	0	0	0	0	0	0	0	0	33.3333	0	0	0	0	0	33.3333	25	0	0	0	0	0	75	0	25	0	25	25	25	50	50	0	0	0	0	0	0	100	0	0	0	100	0	0	0	0	0	0
R4	29.4118	11.7647	0	0	0	0	5.88235	5.88235	0	23.5294	5.88235	0	5.88235	0	5.88235	5.88235	0	21.6216	2.7027	16.2162	16.2162	2.7027	5.40541	32.4324	2.7027	25.7143	14.2857	20	14.2857	25.7143	45.4545	36.3636	9.09091	0	9.09091	0	14.2857	14.2857	57.1429	0	14.2857	0	72.7273	9.09091	9.09091	9.09091	0	50	25
R12	15.3846	0	0	7.69231	7.69231	0	0	15.3846	0	7.69231	7.69231	7.69231	15.3846	7.69231	7.69231	0	0	14.2857	2.85714	8.57143	14.2857	5.71429	5.71429	42.8571	5.71429	19.3548	9.67742	25.8065	16.129	29.0323	57.1429	21.4286	21.4286	0	0	0	20	10	20	30	20	0	36.8421	15.7895	42.1053	5.26316	0	50	0
R14	52.9412	5.88235	5.88235	0	0	5.88235	0	5.88235	0	0	0	11.7647	5.88235	5.88235	0	0	0	19.3548	3.22581	6.45161	6.45161	3.22581	9.67742	48.3871	3.22581	31.0345	10.3448	17.2414	13.7931	24.1379	40	50	0	10	0	0	25	12.5	25	25	12.5	0	47.3684	0	42.1053	5.26316	5.26316	50	50
NS	12.5	8.33333	0	0	16.6667	8.33333	0	8.33333	4.16667	12.5	4.16667	12.5	8.33333	0	4.16667	0	0	19.3548	0	12.9032	11.2903	9.67742	1.6129	38.7097	6.45161	34	14	18	16	18	50	31.25	12.5	0	0	6.25	10	10	20	20	20	20	55	0	40	5	0	33.3333	33.3333
[truncated: 2 more columns]
