# Supplementary material
Source: MDPI journal article supplement (https://www.mdpi.com/1999-4907/12/9/1158)
Supplement: s1 [file s1 › Table S3. Spearmaní»s Rank correlations.xlsx]

## Sheet: Spearman’s Rank correlations
Table S3. Spearman's Rank correlations between environmental variables and proteomic data obtained by Unipept 4.0 peptide analysis
	SOM	LAI	Soil respiration	Oxidoredutases	Hidrolases	Acidobacteria	Cyanobacteria	Thermotogae	Actinobacteria	Spirochaetes	Aquificae	Bacteroidetes	Chlorobi	Chloroflexi	Verrumicobria	Firmicutes	Proteobacteria	Tenericutes	Peptides	Proteins
SOM
LAI	0.9
Soil respiration	0.1	0.3
Oxidoredutases	0.48442	0.51195	0.44589
Hidrolases	0.45908	0.53013	0.50827	0.77439
Acidobacteria	-0.086164	0.024618	0.18464	0.27036	0.50858
Cyanobacteria	0.20926	0.024618	-0.28311	0.16059	-0.030272	0.19545
Thermotogae	0.37796	0.37796	0	0.43693	0.43379	0.20936	0.13957
Actinobacteria	0.33536	0.36656	0.031197	0.13524	0.24935	0.35424	-0.089281	-0.13265
Spirochaetes	-0.18898	-0.18898	0.37796	0.12484	0.24788	0.13957	-0.20936	-0.071429	-0.13265
Aquificae	0.018443	-0.1291	0.11066	0.38376	0.35076	0.074915	0.36095	-0.10456	-0.19418	-0.10456
Bacteroidetes	0.11066	0.11066	0.29508	0.39594	0.48986	0.25199	-0.068104	0.62736	-0.19418	0.73193	-0.15306
Chlorobi	0.11202	0.35007	0.40608	0.53187	0.56019	0.27923	-0.2844	0.39694	0.15071	0.31755	-0.23243	0.51908
Chloroflexi	0.11066	0.11066	0.29508	0.39594	0.48986	0.25199	-0.068104	0.62736	-0.19418	0.73193	-0.15306	1	0.51908
Verrumicobria	-0.18898	-0.18898	0.37796	0.12484	0.24788	0.13957	-0.20936	-0.071429	-0.13265	1	-0.10456	0.73193	0.31755	0.73193
Firmicutes	-0.38639	-0.26495	0	0.1577	0.074212	-0.10396	-0.41582	-0.18777	0.028413	0.18777	0.09773	0.018324	0.16	0.018324	0.18777
Proteobacteria	0.48816	0.55398	0.362	0.057971	0.47392	0.20254	0.038483	-0.031097	0.19122	0.062193	-0.024278	0.027312	0.018433	0.027312	0.062193	-0.26613
Tenericutes	0.33536	0.36656	0.031197	0.13524	0.24935	0.35424	-0.089281	-0.13265	1	-0.13265	-0.19418	-0.19418	0.15071	-0.19418	-0.13265	0.028413	0.19122
Peptides	0.61101	0.43644	0.28368	0.62525	0.69231	0.14102	0.16116	0.24744	0.37272	0.37115	0.33806	0.4588	0.32084	0.4588	0.37115	-0.15358	0.24955	0.37272
Proteins	0.35492	0.15289	0.48597	0.5185	0.62489	0.11493	0.16937	0.12383	0.044715	0.37149	0.53776	0.37462	0.12386	0.37462	0.37149	-0.18808	0.32884	0.044715	0.81144
