# Supplementary material
Source: MDPI journal article supplement (https://www.mdpi.com/1999-4907/12/9/1158)
Supplement: s1 [file s1 › Table S4. Biological processes abundance.xlsx]

## Sheet: Biological Processes
Table S4. Biological processes abundance in the rehabilitation stages, from Unipept 4.0.
Biological Processes	NR	R4	R12	R14	NS
[2Fe-2S] cluster assembly	0	0	0.00420168	0.00434783	0
acetyl-CoA biosynthetic process from acetate	0	0	0.00420168	0	0
acetyl-CoA metabolic process	0	0	0.00420168	0	0
actin cortical patch assembly	0	0.00282486	0	0	0
actin cortical patch localization	0	0	0	0.00434783	0
actin cytoskeleton reorganization	0	0.00282486	0	0	0
actin filament organization	0	0.00564972	0.00420168	0	0.00341297
actin filament polymerization	0	0.00282486	0	0	0
actin nucleation	0	0.00282486	0	0	0
activation of GTPase activity	0	0	0	0.00434783	0
activation of protein kinase activity	0	0.00282486	0	0	0
activation of protein kinase B activity	0	0.00564972	0	0	0
actomyosin contractile ring contraction	0	0	0	0.00434783	0
alanyl-tRNA aminoacylation	0	0.00282486	0	0	0.0204778
aminophospholipid transport	0	0	0	0	0.00682594
apoptotic process	0	0.00282486	0.00420168	0	0
arginine biosynthetic process	0	0	0.00420168	0	0
arginine biosynthetic process via ornithine	0	0	0.00420168	0	0
arginine catabolic process	0	0.00282486	0	0	0
arginine metabolic process	0.0377358	0	0	0	0
arginyl-tRNA aminoacylation	0	0.00282486	0	0.00434783	0
aromatic amino acid family biosynthetic process	0	0	0.00420168	0.00434783	0
aromatic compound catabolic process	0	0	0.00420168	0	0
Arp2/3 complex-mediated actin nucleation	0	0.00282486	0	0	0
ascospore wall assembly	0	0	0	0.00434783	0
ascospore-type prospore membrane assembly	0	0.00282486	0	0	0
aspartyl-tRNA aminoacylation	0	0	0.00840336	0	0
assembly of large subunit precursor of preribosome	0	0	0.00420168	0	0
ATP synthesis coupled proton transport	0	0.0141243	0.012605	0.0130435	0.00682594
ATP-dependent chromatin remodeling	0	0	0	0.00434783	0
autophagosome assembly	0	0.00282486	0	0	0
autophagy	0	0.00282486	0	0	0.00682594
autophagy of mitochondrion	0	0.00282486	0	0	0
autophagy of peroxisome	0	0.00282486	0	0	0
bacterial-type flagellum organization	0	0	0	0.00434783	0
bacteriochlorophyll biosynthetic process	0	0	0	0.00434783	0
base-excision repair	0	0	0.00840336	0.0173913	0
base-excision repair, gap-filling	0	0	0	0	0.00341297
biosynthetic process	0	0	0.00840336	0.00869565	0
box C/D snoRNP assembly	0.0188679	0	0	0	0
carbamoyl phosphate catabolic process	0.0377358	0	0	0	0
carbohydrate catabolic process	0	0	0.00420168	0	0
carbohydrate derivative metabolic process	0	0	0	0	0.00682594
carbohydrate metabolic process	0	0.0112994	0.00840336	0.00434783	0.00341297
cell adhesion	0	0.00282486	0	0	0
cell cycle	0	0.00847458	0.00420168	0.0130435	0
cell differentiation	0	0.00282486	0	0.00869565	0
cell division	0	0.0112994	0.00840336	0.00869565	0
cell migration	0	0.00564972	0	0	0
cell redox homeostasis	0	0.00282486	0	0.00434783	0
cell surface receptor signaling pathway	0	0	0.00420168	0	0
cell tip growth	0	0	0	0.00434783	0
cell wall biogenesis	0	0	0.00420168	0.00434783	0
cell wall organization	0	0	0.00420168	0.00434783	0
cellular amino acid metabolic process	0	0.00564972	0.00420168	0	0
cellular aromatic compound metabolic process	0	0	0.00420168	0.00434783	0
cellular protein-containing complex assembly	0	0	0	0.00434783	0
cellular response to DNA damage stimulus	0	0.00282486	0	0	0
cellular response to glucose starvation	0	0	0	0	0.00682594
cellular response to ionizing radiation	0	0	0.00420168	0	0
cellular response to oxidative stress	0	0	0	0.00434783	0
cellulose catabolic process	0	0.00282486	0	0	0.00341297
chaperone-mediated protein transport	0	0	0	0.00434783	0
chemotaxis	0	0.00282486	0	0	0
chiasma assembly	0	0.00282486	0	0	0
chloroplast accumulation movement	0	0	0.00420168	0	0
chorismate biosynthetic process	0	0	0.00420168	0.00434783	0
chromatin organization	0.0188679	0	0	0.00434783	0.00682594
chromatin remodeling	0.0188679	0	0	0.00434783	0
chromosome condensation	0	0.0112994	0	0	0
chromosome segregation	0	0.00564972	0	0.00869565	0
chronological cell aging	0	0	0	0.00434783	0
COPII-coated vesicle budding	0	0	0.00420168	0	0
cotyledon vascular tissue pattern formation	0	0.00564972	0	0	0
cytoadherence to microvasculature, mediated by symbiont protein	0	0	0	0	0.00682594
cytolysis	0	0	0	0	0.00682594
cytoplasmic microtubule organization	0	0.00564972	0	0	0
cytoplasmic translation	0.0188679	0.00282486	0	0.00434783	0
cytoskeleton-dependent intracellular transport	0	0.00564972	0	0	0
D-alanine biosynthetic process	0	0	0	0.00434783	0
'de novo' pyrimidine nucleobase biosynthetic process	0.0188679	0.00282486	0	0	0
'de novo' UMP biosynthetic process	0.0188679	0	0.00420168	0	0
defense response to bacterium	0	0	0.00420168	0	0
defense response to Gram-negative bacterium	0	0.00282486	0	0	0.00682594
defense response to virus	0	0	0	0.00434783	0
deoxyribonucleotide catabolic process	0	0	0.00420168	0	0
deoxyribose phosphate catabolic process	0	0	0.00420168	0	0
dephosphorylation	0	0	0.00420168	0	0
dimethylallyl diphosphate biosynthetic process	0	0	0	0.00434783	0
DNA damage checkpoint	0	0	0.00420168	0	0
DNA integration	0	0	0	0	0.00341297
DNA mediated transformation	0	0	0	0	0.00682594
DNA methylation	0	0	0.00420168	0.00434783	0
DNA recombination	0	0.00564972	0	0.00434783	0
DNA repair	0.0188679	0.0112994	0.012605	0.0173913	0.0170648
DNA replication	0	0.0225989	0.00420168	0.0130435	0.00682594
DNA restriction-modification system	0	0	0	0	0.00341297
DNA topological change	0	0.00282486	0	0	0
DNA-dependent DNA replication	0	0	0.00420168	0	0
DNA-templated transcription, elongation	0	0	0	0.00434783	0
DNA-templated transcription, initiation	0	0.00282486	0	0	0.00682594
DNA-templated transcription, termination	0	0	0.00840336	0	0
double-strand break repair	0	0	0	0.00434783	0
double-strand break repair via break-induced replication	0	0.00282486	0	0	0
double-strand break repair via homologous recombination	0	0.00564972	0.00420168	0.00434783	0.0102389
double-strand break repair via nonhomologous end joining	0	0	0	0	0.00341297
double-strand break repair via synthesis-dependent strand annealing	0	0	0	0	0.00682594
D-xylose metabolic process	0	0.00282486	0	0	0
endocytosis	0	0.00564972	0.00420168	0.00434783	0
ER-dependent peroxisome organization	0	0.00282486	0	0	0
ergosterol biosynthetic process	0	0	0.00420168	0	0
establishment of cell polarity	0	0.00282486	0	0.00434783	0
establishment of mitotic spindle orientation	0	0.00282486	0	0	0
establishment of protein localization to endoplasmic reticulum membrane	0	0.00282486	0	0	0
establishment or maintenance of actin cytoskeleton polarity	0	0.00282486	0	0	0
exocytosis	0	0	0.00420168	0	0
fatty acid biosynthetic process	0	0	0	0	0.00682594
filamentous growth	0	0.00282486	0	0	0
flower development	0	0.00564972	0	0	0
formation of cytoplasmic translation initiation complex	0	0.00282486	0	0	0
fructose 2,6-bisphosphate metabolic process	0	0	0	0.00434783	0
fructose metabolic process	0	0	0	0.00434783	0
fucose metabolic process	0	0	0	0	0.00682594
fungal-type cell wall organization	0	0.00282486	0	0	0
G2/M transition of mitotic cell cycle	0	0	0.00420168	0	0
gene silencing by RNA	0	0	0	0.00434783	0
gene silencing involved in chronological cell aging	0	0	0	0.00434783	0
generation of catalytic spliceosome for second transesterification step	0	0.00282486	0	0	0
gluconeogenesis	0	0	0.00420168	0	0.00682594
glucose metabolic process	0	0	0.00840336	0	0
glutamine metabolic process	0	0	0.00420168	0.00434783	0
glutamyl-tRNA aminoacylation	0	0	0	0.00434783	0.00682594
glutathione biosynthetic process	0	0	0.00420168	0	0
glycerol catabolic process	0	0.00282486	0	0	0
glycerol metabolic process	0	0.00282486	0	0	0
glycerol-3-phosphate catabolic process	0	0.00282486	0	0	0
glycerol-3-phosphate metabolic process	0	0.00282486	0	0	0
glycine biosynthetic process from serine	0	0	0	0.0130435	0
glycine catabolic process	0.0377358	0	0	0	0
glycolytic process	0	0	0.00840336	0	0
glycyl-tRNA aminoacylation	0.0188679	0.00282486	0	0.00434783	0
GMP biosynthetic process	0	0	0.00420168	0.00434783	0
Gram-negative-bacterium-type cell outer membrane assembly	0	0.00282486	0	0	0
guanosine tetraphosphate metabolic process	0	0	0.00420168	0	0
hemolysis in other organism	0	0.00282486	0	0.00434783	0
heterochromatin maintenance involved in chromatin silencing	0	0	0	0.00434783	0
histidine biosynthetic process	0	0	0.00420168	0	0
histidyl-tRNA aminoacylation	0	0	0	0.00434783	0
histone acetylation	0.0188679	0	0	0	0
histone deacetylation	0	0	0	0.00434783	0
histone exchange	0.0188679	0	0	0	0
histone peptidyl-prolyl isomerization	0	0	0	0	0.00341297
homophilic cell adhesion via plasma membrane adhesion molecules	0	0.00282486	0	0	0
hormone biosynthetic process	0	0.00282486	0	0	0
hydrogen peroxide catabolic process	0	0.00564972	0	0.00434783	0.0136519
immune response	0	0.00282486	0	0	0
inositol lipid-mediated signaling	0	0.00282486	0	0	0
inositol phosphate biosynthetic process	0	0	0	0.00434783	0
interstrand cross-link repair	0	0	0	0.00434783	0
intracellular protein transmembrane transport	0.0188679	0.0112994	0.00420168	0.00434783	0.00341297
intracellular protein transport	0	0.00282486	0	0.00869565	0.00682594
intracellular signal transduction	0	0	0	0.00434783	0
intra-Golgi vesicle-mediated transport	0	0	0	0.00434783	0
intra-S DNA damage checkpoint	0	0.00282486	0.00420168	0	0
ion transport	0	0.00282486	0	0	0
isopentenyl diphosphate biosynthetic process, methylerythritol 4-phosphate pathway	0	0	0	0.00869565	0.00682594
kinetochore assembly	0	0.00282486	0	0	0
lactate biosynthetic process	0	0.00282486	0	0	0
lactate oxidation	0	0.00282486	0	0	0
lamellipodium assembly	0	0.00564972	0	0	0
late endosome to vacuole transport	0	0.00282486	0	0	0
late nucleophagy	0	0.00282486	0	0	0
leaf vascular tissue pattern formation	0	0.00564972	0	0	0
leucine biosynthetic process	0	0.00564972	0	0.00434783	0.00682594
leucyl-tRNA aminoacylation	0	0	0	0	0.00682594
lipid glycosylation	0	0.00282486	0	0	0
lipid metabolic process	0	0	0.00420168	0	0
lipid transport	0	0	0	0	0.00682594
lipopolysaccharide transport	0	0.00282486	0	0	0.00682594
lysine biosynthetic process via diaminopimelate	0	0.00282486	0	0	0
lysine biosynthetic process via diaminopimelate, diaminopimelate-aminotransferase pathway	0	0.00282486	0	0	0
macroautophagy	0	0.00282486	0	0	0
malate metabolic process	0	0	0	0.00434783	0
maturation of 5S rRNA	0	0.00847458	0.0168067	0.00434783	0.00682594
maturation of LSU-rRNA from tricistronic rRNA transcript (SSU-rRNA, 5.8S rRNA, LSU-rRNA)	0	0	0	0.00434783	0
membrane fusion involved in viral entry into host cell	0	0	0	0.00434783	0
membrane organization	0	0.00564972	0	0	0
meristem structural organization	0	0.00564972	0	0	0
mesenchyme migration	0.0566038	0.00847458	0.012605	0.0130435	0.0102389
metabolic process	0.0566038	0.00564972	0.00840336	0.0173913	0.0170648
methionyl-tRNA aminoacylation	0	0	0	0	0.00682594
microtubule nucleation	0	0	0	0.00434783	0
microtubule-based movement	0	0.00847458	0.00840336	0.00434783	0.00341297
mismatch repair	0	0.00564972	0	0.00434783	0
mitochondrial aspartyl-tRNA aminoacylation	0	0.00282486	0	0	0
mitochondrial genome maintenance	0	0	0	0	0.00682594
mitochondrial outer membrane translocase complex assembly	0	0	0	0	0.00682594
mitochondrial respiratory chain complex IV assembly	0.0188679	0	0	0	0
mitochondrial translation	0.0188679	0	0	0	0
mitochondrial translational elongation	0	0.00282486	0	0	0
mitochondrion inheritance	0	0	0	0	0.00682594
mitochondrion-endoplasmic reticulum membrane tethering	0	0	0	0	0.00682594
mitotic cell cycle	0	0.00282486	0	0	0
mitotic chromosome condensation	0	0.00282486	0	0	0
mitotic G2 DNA damage checkpoint	0	0.00282486	0	0	0
mitotic recombination	0	0.00282486	0	0	0
mitotic spindle assembly	0	0.00282486	0	0	0
Mo-molybdopterin cofactor biosynthetic process	0	0.00282486	0.00420168	0	0
mRNA catabolic process	0.0188679	0	0.00420168	0	0.00341297
mRNA cis splicing, via spliceosome	0	0.00847458	0.0168067	0.00869565	0.00682594
mRNA cleavage	0	0	0	0	0.00682594
mRNA processing	0	0	0.00420168	0.00869565	0.0375427
mRNA splicing, via spliceosome	0	0.00564972	0.00840336	0	0
negative regulation of histone exchange	0	0	0	0.00434783	0
negative regulation of programmed cell death	0	0.00282486	0	0	0
negative regulation of transcription by RNA polymerase II	0	0	0	0.00434783	0
negative regulation of transcription, DNA-templated	0	0	0	0	0.00682594
nitrate assimilation	0	0	0.00420168	0	0
nitrate metabolic process	0	0	0	0.00434783	0
nitrogen compound metabolic process	0	0	0	0.00434783	0.00682594
nitrogen fixation	0	0.00282486	0	0	0
N-terminal peptidyl-methionine acetylation	0	0.00564972	0	0	0
N-terminal protein amino acid acetylation	0	0.00564972	0	0	0
nuclear-transcribed mRNA catabolic process, nonsense-mediated decay	0	0.00282486	0	0	0
nucleobase-containing compound metabolic process	0	0.00564972	0	0.00434783	0
nucleotide-excision repair	0	0.00282486	0.00420168	0.00434783	0.0102389
oxidation-reduction process	0.0188679	0.00282486	0.00840336	0.00434783	0
pathogenesis	0	0.00282486	0.00420168	0	0.0136519
pentose-phosphate shunt	0	0	0.00840336	0	0
peptide metabolic process	0	0	0	0.00434783	0
peptidoglycan biosynthetic process	0	0	0.00420168	0.00434783	0
peptidoglycan catabolic process	0	0	0.00840336	0	0
peptidoglycan recognition protein signaling pathway	0	0.00282486	0	0	0
peptidyl-amino acid modification	0	0	0	0.00434783	0
peripheral nervous system neuron development	0	0.00282486	0	0	0
phenylalanyl-tRNA aminoacylation	0	0	0	0.00434783	0
phloem or xylem histogenesis	0	0.00564972	0	0	0.00682594
phosphatidylinositol 5-phosphate metabolic process	0	0	0	0	0.00682594
phosphatidylinositol dephosphorylation	0	0.00282486	0	0	0.00682594
phosphorelay signal transduction system	0	0.00282486	0.00420168	0	0.0136519
photosynthesis	0.0754717	0	0.00420168	0.00434783	0
piecemeal microautophagy of the nucleus	0	0.00282486	0	0	0
polysaccharide catabolic process	0	0.00282486	0	0	0
positive regulation of biosynthetic process of antibacterial peptides active against Gram-negative bacteria	0	0.00282486	0	0	0
positive regulation of cellular response to amino acid starvation	0.0188679	0	0	0	0
positive regulation of cilium assembly	0	0.00564972	0	0	0
positive regulation of defense response to virus by host	0	0.00282486	0	0	0
positive regulation of gene expression	0.0566038	0.00847458	0.012605	0.0130435	0.0102389
positive regulation of intrinsic apoptotic signaling pathway in response to DNA damage	0	0	0.00420168	0	0
positive regulation of mitotic metaphase/anaphase transition	0	0	0	0.00434783	0
positive regulation of protein kinase B signaling	0	0.00282486	0	0	0
positive regulation of protein localization to cilium	0	0.00564972	0	0	0
positive regulation of TOR signaling	0	0.00282486	0	0	0
positive regulation of transcription by RNA polymerase II	0	0.00564972	0	0.00434783	0
positive regulation of transcription, DNA-templated	0	0.00282486	0	0	0
post-embryonic root development	0	0.00564972	0	0	0
production of miRNAs involved in gene silencing by miRNA	0	0	0	0	0.00682594
production of siRNA involved in RNA interference	0	0	0	0	0.00682594
prolyl-tRNA aminoacylation	0	0.00282486	0	0	0
proteasomal ubiquitin-independent protein catabolic process	0	0.00282486	0	0	0
proteasome-mediated ubiquitin-dependent protein catabolic process	0	0.00282486	0	0.00434783	0
protein deubiquitination	0	0.00282486	0	0	0.00341297
protein folding	0	0.0141243	0.0336134	0.026087	0.0170648
protein import	0	0.00847458	0.00420168	0.00434783	0.00341297
protein import into mitochondrial inner membrane	0	0	0.00420168	0.00434783	0
protein import into mitochondrial matrix	0	0	0	0	0.00682594
protein import into mitochondrial outer membrane	0	0	0	0	0.00682594
protein import into peroxisome matrix, receptor recycling	0	0	0	0	0.00341297
protein localization by the Cvt pathway	0	0	0	0.00434783	0
protein metabolic process	0	0.00282486	0	0	0
protein phosphorylation	0	0	0.00420168	0	0
protein processing	0	0.00282486	0	0	0
protein refolding	0.0566038	0.0508475	0.163866	0.073913	0.0989761
protein secretion	0	0	0	0.00434783	0
protein secretion by the type II secretion system	0	0	0	0	0.00682594
protein targeting	0.0188679	0.0112994	0.00420168	0.00869565	0.00341297
protein targeting to mitochondrion	0	0	0.00420168	0	0
protein targeting to peroxisome	0	0	0	0	0.00341297
protein transport	0.0188679	0.00847458	0.0168067	0.00434783	0.00682594
protein transport by the Sec complex	0.0188679	0.00282486	0	0	0
protein transport to vacuole involved in ubiquitin-dependent protein catabolic process via the multivesicular body sorting pathway	0	0.00282486	0	0.00434783	0
protein unfolding	0	0	0.00840336	0	0
protein-chromophore linkage	0.0754717	0	0.00420168	0	0.00682594
protein-containing complex assembly	0	0.00282486	0	0	0
proteolysis involved in cellular protein catabolic process	0	0.00282486	0.00420168	0	0
protoporphyrinogen IX biosynthetic process	0	0.00282486	0	0	0.00682594
pseudouridine synthesis	0	0	0.00420168	0	0.00682594
purine nucleotide metabolic process	0	0	0.00420168	0	0
purine ribonucleoside monophosphate biosynthetic process	0	0	0	0.00434783	0
pyridoxine biosynthetic process	0	0	0	0.00434783	0
pyrimidine nucleotide metabolic process	0	0.00282486	0	0	0
regulation of actin cytoskeleton organization	0	0.0112994	0	0	0
regulation of autophagosome assembly	0	0	0	0	0.00682594
regulation of cell cycle	0	0.00282486	0	0	0
regulation of cell growth	0	0.00282486	0	0	0
regulation of cell proliferation	0	0.00564972	0	0	0
regulation of cell shape	0	0	0.00420168	0.00434783	0
regulation of chromatin organization	0	0	0	0.00434783	0
regulation of circadian rhythm	0	0.00282486	0	0	0
regulation of DNA replication	0	0.00564972	0	0	0
regulation of gene expression	0	0	0.00420168	0.00434783	0
regulation of neuron projection development	0	0.00564972	0	0	0
regulation of nucleosome density	0.0188679	0	0	0.00434783	0
regulation of phosphatidylinositol dephosphorylation	0	0	0	0	0.00682594
regulation of phosphorylation	0	0.00282486	0	0	0
regulation of photoperiodism, flowering	0	0.00282486	0	0	0
regulation of Rho protein signal transduction	0	0	0	0.00434783	0
regulation of secondary shoot formation	0	0.00282486	0	0	0
regulation of transcription by RNA polymerase II	0.0188679	0.00282486	0	0.00434783	0
regulation of transcription, DNA-templated	0.0377358	0.019774	0.0294118	0.0130435	0.0546075
regulation of transcriptional start site selection at RNA polymerase II promoter	0	0	0	0.00434783	0
replication fork processing	0	0.00282486	0	0	0
resolution of meiotic recombination intermediates	0	0.00564972	0	0	0
respiratory electron transport chain	0	0.00282486	0	0	0
response to abscisic acid	0	0.00282486	0	0.00434783	0
response to auxin	0	0	0	0	0.00682594
response to cadmium ion	0	0	0	0	0.00682594
response to cold	0	0	0.00420168	0	0
response to ethylene	0	0	0	0	0.00682594
response to gibberellin	0	0	0	0	0.00682594
response to heat	0	0.00564972	0	0	0
response to jasmonic acid	0	0	0	0	0.00682594
response to mannitol	0	0.00282486	0	0	0
response to organic substance	0	0.00282486	0	0	0
response to oxidative stress	0	0.0112994	0	0.00434783	0.0136519
response to salt stress	0	0.00564972	0	0	0.00682594
response to stress	0	0	0.00420168	0	0
retrograde transport, endosome to Golgi	0	0	0.00420168	0	0
retrograde vesicle-mediated transport, Golgi to ER	0	0.00282486	0	0	0
rhamnose catabolic process	0	0	0	0.00434783	0
riboflavin biosynthetic process	0	0.00282486	0.00420168	0.00434783	0
ribosomal large subunit biogenesis	0	0	0.00420168	0.00434783	0
ribosomal small subunit biogenesis	0	0	0	0	0.00682594
ribosomal subunit export from nucleus	0	0	0.00420168	0	0
ribosome biogenesis	0	0	0.00420168	0.00434783	0.00341297
RNA 3'-end processing	0	0	0	0	0.00682594
RNA processing	0.0188679	0.00564972	0.00420168	0	0.0170648
RNA secondary structure unwinding	0	0	0.00420168	0	0
RNA splicing	0	0	0.00420168	0.00434783	0.0136519
rRNA processing	0	0.00282486	0.00420168	0.00434783	0.0136519
selenocysteine biosynthetic process	0	0	0	0.00869565	0
selenocysteinyl-tRNA(Sec) biosynthetic process	0	0	0	0.00869565	0
self proteolysis	0	0.00282486	0	0.00434783	0
seryl-tRNA aminoacylation	0	0	0	0.00869565	0
siderophore transport	0	0.00282486	0	0	0
signal transduction	0	0	0	0.00434783	0
sister chromatid cohesion	0	0.00282486	0	0.00434783	0
small GTPase mediated signal transduction	0	0	0.00420168	0	0
smoothened signaling pathway	0	0	0	0	0.00682594
sodium ion homeostasis	0	0	0	0	0.00341297
SOS response	0	0.00564972	0	0.00434783	0.0102389
sperm individualization	0	0.00282486	0	0	0
spermidine biosynthetic process	0	0.00282486	0	0	0.00682594
sphingolipid biosynthetic process	0	0.00282486	0	0	0
spindle assembly	0	0	0.00420168	0	0
spindle pole body duplication	0	0	0.00420168	0	0
spliceosomal snRNP assembly	0	0.00847458	0.0210084	0.00434783	0.00682594
sporulation resulting in formation of a cellular spore	0	0.00282486	0	0	0
SRP-dependent cotranslational protein targeting to membrane	0	0	0	0.00869565	0
steroid biosynthetic process	0	0	0	0.00434783	0
sterol biosynthetic process	0	0.00282486	0	0	0
sucrose metabolic process	0	0.00282486	0	0	0
synapsis	0	0.00282486	0	0	0
taurine transport	0	0	0	0	0.00341297
termination of RNA polymerase I transcription	0	0	0	0.00434783	0
termination of RNA polymerase II transcription	0	0	0	0.00434783	0
terpenoid biosynthetic process	0	0	0	0.00434783	0.00682594
tetrahydrofolate interconversion	0	0	0	0.0130435	0
tetrapyrrole biosynthetic process	0	0	0.00420168	0	0
thiamine biosynthetic process	0	0.00282486	0.00420168	0.0130435	0
thiamine diphosphate biosynthetic process	0	0	0.00420168	0.0130435	0
TOR signaling	0	0.0112994	0	0	0
transcription, DNA-templated	0.0377358	0.0508475	0.0588235	0.0391304	0.0716724
transformation of host cell by virus	0	0	0	0.00434783	0
translation	0.0188679	0.0282486	0.0798319	0.0434783	0.0341297
translation reinitiation	0	0.00282486	0	0	0
translational elongation	0	0.00282486	0	0	0
translesion synthesis	0	0	0	0.00434783	0
transmembrane transport	0	0.00282486	0.00420168	0	0.00682594
transport along microtubule	0	0	0	0.00434783	0
transposition, DNA-mediated	0	0.00282486	0	0	0
trehalose biosynthetic process	0	0	0.00420168	0	0
trehalose metabolism in response to stress	0	0	0.00420168	0	0
tricarboxylic acid cycle	0	0	0.00420168	0	0
tRNA aminoacylation for protein translation	0	0	0.00840336	0	0
tRNA methylation	0	0	0	0.00434783	0
tRNA modification	0	0	0	0.00869565	0
tRNA processing	0	0	0.00420168	0	0
tRNA pseudouridine synthesis	0	0	0.00420168	0	0
tRNA splicing, via endonucleolytic cleavage and ligation	0	0.00282486	0	0	0
tryptophan biosynthetic process	0	0.00282486	0	0	0
tryptophanyl-tRNA aminoacylation	0	0	0	0.00434783	0
tyrosyl-tRNA aminoacylation	0	0.00847458	0	0	0
ubiquitin-dependent ERAD pathway	0	0.00282486	0	0	0
ubiquitin-dependent protein catabolic process	0	0.00847458	0	0.00434783	0.00341297
urea cycle	0	0	0.00420168	0	0
vacuole inheritance	0	0	0	0.00434783	0
valyl-tRNA aminoacylation	0	0.0112994	0	0	0
vegetative to reproductive phase transition of meristem	0	0.00282486	0	0	0
vesicle docking involved in exocytosis	0	0.00282486	0	0	0.00341297
vesicle organization	0	0	0.00420168	0	0
vesicle-mediated transport	0	0.00282486	0	0.00434783	0
viral RNA genome replication	0	0.00282486	0	0.00869565	0
virion attachment to host cell	0	0	0	0.00434783	0
