# Supplementary material
Source: MDPI journal article supplement (https://www.mdpi.com/1999-4907/12/9/1158)
Supplement: s1 [file s1 › Table S5. Peptide list used for functional and taxonomic analysis in Unipept 4.0 and Unipept Desktop.csv]

Table S5. Peptide list used for functional and taxonomic analysis in Unipept 4.0 and Unipept Desktop.
Biological sample category	Protein accession numbers	Peptide sequence
Nonrehabilitated	ACTG_PENCH	SYELPDGQVITIGNER
Nonrehabilitated	MTC6_PICGU	TVVDNENVPFTPSSFR
Nonrehabilitated	NUOB1_RHOPA,NUOB1_RHOPT	QPTPSQHPVGAQPLIARPATGIIDPNTGRPVGADDPFFLNVNR
Nonrehabilitated	CH60_BURTH	AAVEEGIVPGGGVALIR
Nonrehabilitated	PSAB1_NOSS1	FSQDLAQDPTTR
Nonrehabilitated	SECY_STACT	ADWAQQIANTANPSSNIGMVIYIILIIAFTYFYAFVQVNPEK
Nonrehabilitated	CH602_METCA	AAVEEGIVPGGGVALIR
Nonrehabilitated	ACT_AJECG	SYELPDGQVITIGNER
Nonrehabilitated	ACT_AJECG	VAPEEHPVLLTEAPINPK
Nonrehabilitated	ACT1_SCHCO	SYELPDGQVITIGNER
Nonrehabilitated	ACT_MESVI	SYELPDGQVITIGNER
Nonrehabilitated	ACT_MESVI	VAPEEHPVLLTEAPLNPK
Nonrehabilitated	SYGB_LISW6	HEGNVEVDPSLFENK
Nonrehabilitated	A9TQZ6_PHYPA	DLNKPAWTPPGPIFGLIWTFIYPLMGLASWLVWADGGFQR
Nonrehabilitated	ACT_SCHDU	VAPEEHPVLLTEAPLNPK
Nonrehabilitated	ACT1_SOYBN	VAPEEHPVLLTEAPLNPK
Nonrehabilitated	RM13_YEAST	LAVSSAPFNQWLSR
Nonrehabilitated	A9RCH7_PHYPA	VDLFLQAADVELK
Nonrehabilitated	CH602_METCA	AAVEEGIVPGGGVALIR
Nonrehabilitated	ACT_SCHDU	VAPEEHPVLLTEAPLNPK
Nonrehabilitated	BBP1_CANGA	WTVDALFGSGVSPSAK
Nonrehabilitated	YL87_SCHPO	SEENLELPTFPASEESLSR
Nonrehabilitated	RUVB1_YARLI	TAALMENFRR
Nonrehabilitated	ACTG_PENCH	SYELPDGQVITIGNER
Nonrehabilitated	A9T3M3_PHYPA	VQELHSETISSK
Nonrehabilitated	DEOC_ELUMP	DLETLTK
Nonrehabilitated	ACT_MESVI	SYELPDGQVITIGNER
Nonrehabilitated	ACT_MESVI	VAPEEHPVLLTEAPLNPK
Nonrehabilitated	PYRF_CLOP1,PYRF_CLOPE	NGNGGIVNSSR
Nonrehabilitated	M0RHE9_MUSAM	QSINPSIDGLTGR
Nonrehabilitated	ACT_AJECG	SYELPDGQVITIGNER
Nonrehabilitated	ACT_AJECG	VAPEEHPVLLTEAPINPK
Nonrehabilitated	PSAB1_NOSS1	FSQDLAQDPTTR
Nonrehabilitated	ACT1_SCHCO	SYELPDGQVITIGNER
Nonrehabilitated	K3XKD0_SETIT	SSLFDVVENADR
Nonrehabilitated	W1P9K5_AMBTC	IAGPTPTPQATADNLTPAT
Nonrehabilitated	YDGA_ECOLI	VAFSGGEFQLNADRDGK
Nonrehabilitated	ARCC2_STAA3,ARCC2_STAA8,ARCC2_STAAB,ARCC2_STAAC,ARCC2_STAAM,ARCC2_STAAN,ARCC2_STAAS,ARCC2_STAAW	ILTEMNSDRTVGTIVTR
Nonrehabilitated	DDH2_SCHPO	TVGVIGTGK
Nonrehabilitated	PHCA_THEEB	TPITEAIAAADTQGR
Nonrehabilitated	GTP1_SCHPO	TADLILMVLDATK
Nonrehabilitated	CH602_METCA	AAVEEGIVPGGGVALIR
Nonrehabilitated	ACT_SCHDU	VAPEEHPVLLTEAPLNPK
Nonrehabilitated	D8RRP6_SELML,D8RXK0_SELML	ANPRDVEVEILCADDFHNLR
Nonrehabilitated	ACTG_PENCH	SYELPDGQVITIGNER
Nonrehabilitated	DEOC_ELUMP	DLETLTK
Nonrehabilitated	ACT_MESVI	SYELPDGQVITIGNER
Nonrehabilitated	ACT_MESVI	VAPEEHPVLLTEAPLNPK
Nonrehabilitated	ACT_AJECG	SYELPDGQVITIGNER
Nonrehabilitated	PSAB1_NOSS1	FSQDLAQDPTTR
Nonrehabilitated	ACT1_SOYBN	VAPEEHPVLLTEAPLNPK
Nonrehabilitated	RS2_SOLUE	FVGEMAAQGK
Nonrehabilitated	ACT1_SCHCO	SYELPDGQVITIGNER
Nonrehabilitated	ACT1_SCHCO	VAPEEHPVLLTEAPLNPK
Nonrehabilitated	D8RJT7_SELML	EAIEVAFQMQVAGEMR
Nonrehabilitated	RM27_SCHPO	HQSLLCFGAR
Nonrehabilitated	D8SIT5_SELML	SLFDQSPFSSLR
Nonrehabilitated	PNP_VIBPA	GIAAVMPSVDEFPYTVR
Early rehabilitation (4 years)	RL19_OLICO	QTTTAAAAAE
Early rehabilitation (4 years)	RPOC_ROSDO	DHAIIAEIDGYVR
Early rehabilitation (4 years)	A9SEL4_PHYPA	HVTNAHNMIR
Early rehabilitation (4 years)	A9SEL4_PHYPA	RLEGMEGRPK
Early rehabilitation (4 years)	A9SEL4_PHYPA	WADTLNR
Early rehabilitation (4 years)	A9T927_PHYPA	NSGGSPR
Early rehabilitation (4 years)	Y2351_IDILO	MYICAALYK
Early rehabilitation (4 years)	D8TAW5_SELML	LVSVDGFELSQR
Early rehabilitation (4 years)	RPOC_PARL1	GSPAQMK
Early rehabilitation (4 years)	CH10_PROM1,CH10_PROM4,CH10_PROMA,CH10_PROMM,CH10_PROMT,CH10_SYNPW,CH10_SYNPX,CH10_SYNS9,CH10_SYNSC	TAGGILLPDTAK
Early rehabilitation (4 years)	SECA_BACFR	AGIENVELEDREEVFAQIDK
Early rehabilitation (4 years)	RPOC_PARDP	DHAIIAEIDGYVR
Early rehabilitation (4 years)	D8SBC9_SELML	EKNGSGK
Early rehabilitation (4 years)	W1PV03_AMBTC	FNSLIGYFNAHK
Early rehabilitation (4 years)	ACT_SCHDU	MSKEITAVAPSSMK
Early rehabilitation (4 years)	ACT_SCHDU	VAPEEHPVLLTEAPLNPK
Early rehabilitation (4 years)	RPOB_MAGSA	AGDFVMVPPNEINMIDVSPK
Early rehabilitation (4 years)	D8R9P9_SELML,D8SE78_SELML	GVSFTQDGK
Early rehabilitation (4 years)	D8R9P9_SELML,D8SE78_SELML	QGIGLLAWSADSR
Early rehabilitation (4 years)	ACTG_PENCH	SYELPDGQVITIGNER
Early rehabilitation (4 years)	CR1AG_BACTU	ALEYFPETDK
Early rehabilitation (4 years)	ATG17_SCHPO	SIVDEFVGR
Early rehabilitation (4 years)	A9T945_PHYPA	EVYTILESFQASEVTAETR
Early rehabilitation (4 years)	A9T945_PHYPA	NVSKQGYGGMR
Early rehabilitation (4 years)	MUKB_SODGM	GADGWLR
Early rehabilitation (4 years)	CH60_METSB	VGNEGVITVEEAK
Early rehabilitation (4 years)	CH60_METI4	AAVEEGIVPGGGVALLR
Early rehabilitation (4 years)	CH60_METI4	TSDVAGDGTTTATVLAESIYKEGLK
Early rehabilitation (4 years)	D8R583_SELML	RPNGPACKDGVIWWR
Early rehabilitation (4 years)	LEU1_NITEU	MSPDQVIDQAIK
Early rehabilitation (4 years)	LEU1_NITEU	VLEAVIDAGAR
Early rehabilitation (4 years)	A9T2F1_PHYPA	EKDQFNDGGWIQDR
Early rehabilitation (4 years)	Y3G1_ENCCU	EVANSMKDGIKDLANK
Early rehabilitation (4 years)	CH601_ERYLH	VGNEGVITVEEAK
Early rehabilitation (4 years)	U5DAR8_AMBTC	AETPTQR
Early rehabilitation (4 years)	U5DAR8_AMBTC	DDRHVSR
Early rehabilitation (4 years)	ATPB1_RHOS1,ATPB1_RHOS4,ATPB_RHOS5	ATASQGK
Early rehabilitation (4 years)	ATPB1_RHOS1,ATPB1_RHOS4,ATPB_RHOS5	FTQAGSEVSALLGR
Early rehabilitation (4 years)	A9U416_PHYPA	TGHMRPHR
Early rehabilitation (4 years)	PDI_ARTBC	LFPADDK
Early rehabilitation (4 years)	RL7_MYXXD	AITGLGLK
Early rehabilitation (4 years)	SP110_ASHGO	QGLEMLDELQEWK
Early rehabilitation (4 years)	ATPB_ANADE	FTQAGSEVSALLGR
Early rehabilitation (4 years)	SYGB_RHILO	EIAHGNGK
Early rehabilitation (4 years)	MUKB_HAEIN	GADGWLR
Early rehabilitation (4 years)	CH601_RHOPS	AAVEEGIVPGGGVALLR
Early rehabilitation (4 years)	CH601_RHOPS	AQIEETTSDYDR
Early rehabilitation (4 years)	CH601_RHOPS	AVAAGMNPMDLK
Early rehabilitation (4 years)	CH601_RHOPS	GYISPYFVTNADKMR
Early rehabilitation (4 years)	CH601_RHOPS	VGNEGVITVEEAK
Early rehabilitation (4 years)	A9T0H0_PHYPA	GETSHVGNTPPK
Early rehabilitation (4 years)	RPOC_GLUOX	GSPAQMK
Early rehabilitation (4 years)	RLA1_CANAL	ANVEVEGIWADLFAK
Early rehabilitation (4 years)	SYY_NITWN	ILSYDQIDANK
Early rehabilitation (4 years)	EIF3A_SCHPO	QESEAESLR
Early rehabilitation (4 years)	SYY_NITOC	KEVEQGANPR
Early rehabilitation (4 years)	M0S1Z3_MUSAM	TLPSSTLR
Early rehabilitation (4 years)	CH602_SYNFM	AAVEEGIVPGGGVALLR
Early rehabilitation (4 years)	CH60_SOLUE	AAVEEGIVPGGGVALLR
Early rehabilitation (4 years)	CH60_SOLUE	LAGGVAVIK
Early rehabilitation (4 years)	CH60_CUPMC	AAVEEGIVPGGGVALLR
Early rehabilitation (4 years)	CH60_CUPMC	LAGGVAVIK
Early rehabilitation (4 years)	EFTS_HERA2	LAYDLALHVAATNPSYVNREEVPAAEVERER
Early rehabilitation (4 years)	CH60_HAEDU	AAVEEGIVPGGGVALVR
Early rehabilitation (4 years)	CH60_HAEDU	AVAAGMNPMDLKR
Early rehabilitation (4 years)	CH60_HAEDU	LAGGVAVIK
Early rehabilitation (4 years)	D8QV63_SELML	SAVEGELR
Early rehabilitation (4 years)	W1NEU6_AMBTC	EREKDSDK
Early rehabilitation (4 years)	W1NEU6_AMBTC	RERESDK
Early rehabilitation (4 years)	CH60_POLNS	AAVEEGIIPGGGVALIR
Early rehabilitation (4 years)	ATPB_BACV8	FTQAGSEVSALLGR
Early rehabilitation (4 years)	ATPB_BACV8	GMEVIPTGHPITMPVGNQIK
Early rehabilitation (4 years)	PRSA_STRMU	EITDASYK
Early rehabilitation (4 years)	A9SN69_PHYPA	EVYTILESFQAAEVTVETR
Early rehabilitation (4 years)	A9SN69_PHYPA	NVSKQGYGGMR
Early rehabilitation (4 years)	RPOB_MYCGE	YSPTATR
Early rehabilitation (4 years)	M0SI60_MUSAM	LYGQSISAVTAGMK
Early rehabilitation (4 years)	M0SUQ7_MUSAM	ERERERES
Early rehabilitation (4 years)	KCY_BORT9	LKDDNYIIEGR
Early rehabilitation (4 years)	ACT_AJECG	SYELPDGQVITIGNER
Early rehabilitation (4 years)	ACT_AJECG	VAPEEHPVLLTEAPINPK
Early rehabilitation (4 years)	M0SV91_MUSAM	ERERERERESRER
Early rehabilitation (4 years)	M0SV91_MUSAM	ERERESR
Early rehabilitation (4 years)	A9SRH7_PHYPA	EFHDIIIDSIER
Early rehabilitation (4 years)	A9TKZ9_PHYPA	EREQVER
Early rehabilitation (4 years)	A9TKZ9_PHYPA	KPDGTYTSK
Early rehabilitation (4 years)	ATPB_STAEQ	FTQAGSEVSALLGR
Early rehabilitation (4 years)	ATPB_BACFN	FTQAGSEVSALLGR
Early rehabilitation (4 years)	ATPB_BACFN	GHWDLSK
Early rehabilitation (4 years)	ATPB_BACLD	AKEMGVEV
Early rehabilitation (4 years)	ATPB_BACLD	FTQAGSEVSALLGR
Early rehabilitation (4 years)	CH603_BRASB	VGNEGVITVEEAK
Early rehabilitation (4 years)	CUE1_ASHGO	RPVNDDMIEVVQALAPHLHSEQIR
Early rehabilitation (4 years)	ACT1_SCHCO	SYELPDGQVITIGNER
Early rehabilitation (4 years)	ADDB_EXIS2	FAFHMIR
Early rehabilitation (4 years)	MUS81_ARATH	GLSENLER
Early rehabilitation (4 years)	A9TC43_PHYPA	RGTLFSVNGSLK
Early rehabilitation (4 years)	CH601_POLNA	AAVEEGIVPGGGVALLR
Early rehabilitation (4 years)	CH601_POLNA	YLAGGMNPMDLKR
Early rehabilitation (4 years)	RF1_TREPA,RF1_TREPS	EITFSISGR
Early rehabilitation (4 years)	KATG_HAHCH	SPAGAHQWVPK
Early rehabilitation (4 years)	SYP_CHLPM	LADYSDVR
Early rehabilitation (4 years)	RL7_METNO	AITGLGLK
Early rehabilitation (4 years)	CH602_AZOC5	AAVEEGIVPGGGVALLR
Early rehabilitation (4 years)	CH602_AZOC5	AQIEETTSDYDR
Early rehabilitation (4 years)	CH602_AZOC5	AVAAGMNPMDLK
Early rehabilitation (4 years)	CH602_AZOC5	VGNEGVITVEEAK
Early rehabilitation (4 years)	A9RPV1_PHYPA	TVARESESYGAR
Early rehabilitation (4 years)	CH601_NITWN	AQIEETTSDYDR
Early rehabilitation (4 years)	CH601_NITWN	AVAAGMNPMDLK
Early rehabilitation (4 years)	CH601_NITWN	VGNEGVITVEEAK
Early rehabilitation (4 years)	W1NMN0_AMBTC	SGAATFVTATGEPVSDR
Early rehabilitation (4 years)	D8TAR4_SELML	HGKEKEAHSHQISSR
Early rehabilitation (4 years)	SYV_BACSK	VTFVPQRFEQTYIR
Early rehabilitation (4 years)	CH601_MYCUA	LAGGVAVIK
Early rehabilitation (4 years)	BAS1_YEAST	MTQVGQTHTSGSIR
Early rehabilitation (4 years)	A9SYR9_PHYPA	IWNIFDFSLAR
Early rehabilitation (4 years)	A9SNZ3_PHYPA	DKDRDREK
Early rehabilitation (4 years)	A9SNZ3_PHYPA	EKEKERER
Early rehabilitation (4 years)	A9SNZ3_PHYPA	EKERERERER
Early rehabilitation (4 years)	A9SNZ3_PHYPA	ERYENAVAK
Early rehabilitation (4 years)	A9SNZ3_PHYPA	SGFATVEKEPVGSLTPMLGDNK
Early rehabilitation (4 years)	MOAA_MANSM	IVGAFAAMGTEK
Early rehabilitation (4 years)	CH60_HYPNA	AAVEEGIVPGGGVALLR
Early rehabilitation (4 years)	CH60_HYPNA	LAGGVAVIK
Early rehabilitation (4 years)	CH60_HYPNA	VGNEGVITVEEAK
Early rehabilitation (4 years)	U5CY39_AMBTC	LQSSTDDAQR
Early rehabilitation (4 years)	MUKB_YERP3,MUKB_YERPA,MUKB_YERPE,MUKB_YERPG,MUKB_YERPN,MUKB_YERPP,MUKB_YERPS,MUKB_YERPY	GADGWLR
Early rehabilitation (4 years)	U5CYA3_AMBTC	FPGYLSGNER
Early rehabilitation (4 years)	CH60_THIDA	AAVEEGIVPGGGVALLR
Early rehabilitation (4 years)	CH60_THIDA	LAGGVAVIK
Early rehabilitation (4 years)	DNAJ_YERE8	GAGQVHMR
Early rehabilitation (4 years)	ATPB_HERA2	FTQAGSEVSALLGR
Early rehabilitation (4 years)	ATPB_HERA2	VFDVQGRPIDGEGAVGTTK
Early rehabilitation (4 years)	W1NGD9_AMBTC	EKERERERER
Early rehabilitation (4 years)	MUTS_LAWIP	SVFVPNDLVMDETRR
Early rehabilitation (4 years)	ARPC2_SCHPO	QAELADLAR
Early rehabilitation (4 years)	RL7_BRADU,RL7_BRASO,RL7_RHOP2,RL7_RHOP5,RL7_RHOPB	AITGLGLK
Early rehabilitation (4 years)	RL7_BRADU,RL7_BRASO,RL7_RHOP2,RL7_RHOP5,RL7_RHOPB	IVDDLSSLTVLEAAELAK
Early rehabilitation (4 years)	TSC11_YEAST	CLPIEFDLDK
Early rehabilitation (4 years)	CH601_SYNS3	LAGGVAVIK
Early rehabilitation (4 years)	ACT_MESVI	SYELPDGQVITIGNER
Early rehabilitation (4 years)	ACT_MESVI	VAPEEHPVLLTEAPLNPK
Early rehabilitation (4 years)	W1PL18_AMBTC	DREKERERDR
Early rehabilitation (4 years)	W1PL18_AMBTC	DREKERERDREKER
Early rehabilitation (4 years)	W1PL18_AMBTC	EKEKERER
Early rehabilitation (4 years)	W1PL18_AMBTC	ERERDREKEK
Early rehabilitation (4 years)	M0SFH2_MUSAM	HKSILNNSK
Early rehabilitation (4 years)	CH602_METCA	LAGGVAVIK
Early rehabilitation (4 years)	DOT1_USTMA	APTAAQPASSTSTAVNGAR
Early rehabilitation (4 years)	HEM6_PSEU5	TESILMSLPPQVAWGYDK
Early rehabilitation (4 years)	CH60_ACICJ	AQIEETTSDYDR
Early rehabilitation (4 years)	CH60_ACICJ	AVAAGMNPMDLK
Early rehabilitation (4 years)	CH60_ACICJ	VGNEGVITVEEAK
Early rehabilitation (4 years)	CH604_RHILO	AVAAGMNPMDLK
Early rehabilitation (4 years)	CH604_RHILO	VGNEGVITVEEAK
Early rehabilitation (4 years)	RIBBA_BACAM	QIAEEGR
Early rehabilitation (4 years)	A9SMH1_PHYPA	NVSKQGYGGMR
Early rehabilitation (4 years)	CH60_CUPNH	AAVEEGIVPGGGVALLR
Early rehabilitation (4 years)	CH60_CUPNH	LAGGVAVIK
Early rehabilitation (4 years)	A9TCQ2_PHYPA	LLSEDSKEQMREASKEASFR
Early rehabilitation (4 years)	FB204_ARATH	LDLTSFEWAER
Early rehabilitation (4 years)	RS2_SOLUE	QAQEAIAEEANR
Early rehabilitation (4 years)	A9RLE6_PHYPA	VEEIDTSK
Early rehabilitation (4 years)	D8R3Z2_SELML,D8RAK5_SELML	MVAATLELENER
Early rehabilitation (4 years)	MUTL_CLOAB	TINIEIENGGR
Early rehabilitation (4 years)	Y1703_LISMO,Y1727_LISMF,Y1815_LISIN	GMDIIPESIEDAKR
Early rehabilitation (4 years)	CH101_RHIME	GGIIIPDTAK
Early rehabilitation (4 years)	Q66LI7_ARAAE	QTGSSVIDTQQNPPSR
Early rehabilitation (4 years)	ACT_SCHDU	VAPEEHPVLLTEAPLNPK
Early rehabilitation (4 years)	ACTG_PENCH	DLYGNIVMSGGTTMYPGISDR
Early rehabilitation (4 years)	ACTG_PENCH	SYELPDGQVITIGNER
Early rehabilitation (4 years)	CH601_POLNA	AAVEEGIVPGGGVALLR
Early rehabilitation (4 years)	CH601_ERYLH	VGNEGVITVEEAK
Early rehabilitation (4 years)	A9TUK5_PHYPA	DRDREKDKERERER
Early rehabilitation (4 years)	E0Z1D0_SOLLC	FNIVSPGADVNLYFPYSEK
Early rehabilitation (4 years)	CH603_NITHX	AQIEETTSDYDR
Early rehabilitation (4 years)	M0SGE1_MUSAM	MGNISPLTGATGEIR
Early rehabilitation (4 years)	CH601_RHOPS	AAVEEGIVPGGGVALLR
Early rehabilitation (4 years)	CH601_RHOPS	AQIEETTSDYDR
Early rehabilitation (4 years)	CH601_RHOPS	VGNEGVITVEEAK
Early rehabilitation (4 years)	IF2_VESOH	IDKEGTDVDK
Early rehabilitation (4 years)	CH602_SYNFM	AAVEEGIVPGGGVALLR
Early rehabilitation (4 years)	CH60_SOLUE	AAVEEGIVPGGGVALLR
Early rehabilitation (4 years)	CH60_CUPMC	AAVEEGIVPGGGVALLR
Early rehabilitation (4 years)	DSL1_YEAST	ITENSIQFTPTVEWGK
Early rehabilitation (4 years)	CH60_METI4	AAVEEGIVPGGGVALLR
Early rehabilitation (4 years)	CH603_RHIL3	AQIEETTSDYDR
Early rehabilitation (4 years)	CH60_POLNS	AAVEEGIIPGGGVALIR
Early rehabilitation (4 years)	ACT_AJECG	DLYGNIVMSGGTTMYPGISDR
Early rehabilitation (4 years)	ACT_AJECG	SYELPDGQVITIGNER
Early rehabilitation (4 years)	ACT_AJECG	VAPEEHPVLLTEAPINPK
Early rehabilitation (4 years)	CH603_BRASB	VGNEGVITVEEAK
Early rehabilitation (4 years)	M0STN7_MUSAM	EITALAPSSMK
Early rehabilitation (4 years)	ACT1_SCHCO	SYELPDGQVITIGNER
Early rehabilitation (4 years)	CH602_AZOC5	AAVEEGIVPGGGVALLR
Early rehabilitation (4 years)	CH602_AZOC5	AQIEETTSDYDR
Early rehabilitation (4 years)	CH602_AZOC5	VGNEGVITVEEAK
Early rehabilitation (4 years)	CH601_NITWN	AQIEETTSDYDR
Early rehabilitation (4 years)	CH601_NITWN	VGNEGVITVEEAK
Early rehabilitation (4 years)	CH60_HYPNA	AAVEEGIVPGGGVALLR
Early rehabilitation (4 years)	CH60_HYPNA	VGNEGVITVEEAK
Early rehabilitation (4 years)	GLNH_ECO57,GLNH_ECOL6,GLNH_ECOLI	LVVATDTAFVPFEFK
Early rehabilitation (4 years)	DLD3_YEAST	ALNAVFFGIENFDTVQK
Early rehabilitation (4 years)	ACT_MESVI	EITALAPSSMK
Early rehabilitation (4 years)	ACT_MESVI	SYELPDGQVITIGNER
Early rehabilitation (4 years)	ACT_MESVI	VAPEEHPVLLTEAPLNPK
Early rehabilitation (4 years)	CH60_ACICJ	AQIEETTSDYDR
Early rehabilitation (4 years)	CH60_ACICJ	VGNEGVITVEEAK
Early rehabilitation (4 years)	CH604_RHILO	VGNEGVITVEEAK
Early rehabilitation (4 years)	A9SZJ5_PHYPA	DKEKDYIPGPGTYNQDLR
Early rehabilitation (4 years)	YHE7_SCHPO,YI47_SCHPO,YI76_SCHPO	DFLSIWINESFINENR
Early rehabilitation (4 years)	CH60_CUPNH	AAVEEGIVPGGGVALLR
Early rehabilitation (4 years)	BZZ1_YEAST	TTSTNNTK
Early rehabilitation (4 years)	A9SEL4_PHYPA	HVTNAHNMIRDADR
Early rehabilitation (4 years)	DPO3A_MYCBO,DPO3A_MYCTO,DPO3A_MYCTU	GDTLGVFQLDGGPMR
Early rehabilitation (4 years)	M0S175_MUSAM	EPGRERDR
Early rehabilitation (4 years)	A9TZN7_PHYPA	ESVSYGAR
Early rehabilitation (4 years)	A9TZN7_PHYPA	LQENTSK
Early rehabilitation (4 years)	GAE2_ARATH	WYLGYYK
Early rehabilitation (4 years)	W1P8K8_AMBTC	SLNEVDVR
Early rehabilitation (4 years)	EFGM_PYRTR	AIYNEGPK
Early rehabilitation (4 years)	Y3023_ACIAD	DGRATSSDNILDVQLTVPK
Early rehabilitation (4 years)	Y3023_ACIAD	MSLEQVVYTAHAK
Early rehabilitation (4 years)	A9RL11_PHYPA	ALVEDYLTENGVASR
Early rehabilitation (4 years)	A9TBM6_PHYPA	AHDSSSAKR
Early rehabilitation (4 years)	ACT_SCHDU	VAPEEHPVLLTEAPLNPK
Early rehabilitation (4 years)	D8QNG8_SELML	FVNGGDR
Early rehabilitation (4 years)	W1NDV1_AMBTC	EITPFLNMCIQAPR
Early rehabilitation (4 years)	W1P3X6_AMBTC	GVGQVQGGYNPK
Early rehabilitation (4 years)	ACTG_PENCH	SYELPDGQVITIGNER
Early rehabilitation (4 years)	ATG26_NEOFI	ANVGTGQQIDELGR
Early rehabilitation (4 years)	MUKB_SODGM	GADGWLR
Early rehabilitation (4 years)	YCGJ_BACSU	TNETPFSK
Early rehabilitation (4 years)	RF1_HAMD5	LDEVMSGK
Early rehabilitation (4 years)	A9S3L6_PHYPA	IGFDGSLLLEEITCFK
Early rehabilitation (4 years)	M0SFH2_MUSAM	CLAYVEAR
Early rehabilitation (4 years)	M0SFH2_MUSAM	EERERER
Early rehabilitation (4 years)	M0SFH2_MUSAM	HKSILNNSK
Early rehabilitation (4 years)	RPOC_ALKEH	VLEANDALEAADK
Early rehabilitation (4 years)	V4MB68_EUTSA	MELTWTQGLR
Early rehabilitation (4 years)	HLYA_PROMI	DVTFAGSDLK
Early rehabilitation (4 years)	W1PI18_AMBTC	AVDLFNTASEQLK
Early rehabilitation (4 years)	A9TKZ9_PHYPA	EERERER
Early rehabilitation (4 years)	EFTU_FLESI	TVVTGVEMFR
Early rehabilitation (4 years)	SYDM_SCHPO	RPGNEFELHVEDVK
Early rehabilitation (4 years)	A9SRQ6_PHYPA	DQLFSAGKDAQKDAEK
Early rehabilitation (4 years)	W1NP05_AMBTC	QSAALVEMR
Early rehabilitation (4 years)	RS20_FRASC	THANLAAS
Early rehabilitation (4 years)	A9S8J4_PHYPA	ASAGSGTK
Early rehabilitation (4 years)	GUNG_CLOCE	SQIDYALGSTGR
Early rehabilitation (4 years)	SYJ2_SCHPO	VPSTDEFK
Early rehabilitation (4 years)	CH603_NITHX	AVAAGMNPMDLKR
Early rehabilitation (4 years)	D8S838_SELML	GEGLPISMR
Early rehabilitation (4 years)	RPOC_SULSY	EGLSVVEYFISTYGAR
Early rehabilitation (4 years)	MUKB_HAEIN	GADGWLR
Early rehabilitation (4 years)	CH601_RHOPS	AAVEEGIVPGGGVALLR
Early rehabilitation (4 years)	CH601_RHOPS	AVAAGMNPMDLKR
Early rehabilitation (4 years)	CH60_CLOB8	AVEEIQK
Early rehabilitation (4 years)	EIF3A_SCHPO	IQQERDEEISR
Early rehabilitation (4 years)	EFTS_WOLPM,EFTS_WOLWR	DGVIAGYVHGDVCGLGK
Early rehabilitation (4 years)	A9REA9_PHYPA	GQLVMEQEK
Early rehabilitation (4 years)	HPAB1_PSESS	PGINGAGPSNFFWQWR
Early rehabilitation (4 years)	CH602_SYNFM	AAVEEGIVPGGGVALLR
Early rehabilitation (4 years)	CH60_SOLUE	AAVEEGIVPGGGVALLR
Early rehabilitation (4 years)	A9RZ10_PHYPA	ADLSKDLDSR
Early rehabilitation (4 years)	UVRA_HAEDU	TIHQVLEMTVEEAR
Early rehabilitation (4 years)	CH60_HAEPS	AVAAGMNPMDLKR
Early rehabilitation (4 years)	KGUA_RHOFT	GQEKHGR
Early rehabilitation (4 years)	D8RRZ3_SELML	AAQIHSGSSSQGNVTSK
Early rehabilitation (4 years)	W1NEU6_AMBTC	EERERER
Early rehabilitation (4 years)	W1NEU6_AMBTC	SNVCNLLIATSIAAR
Early rehabilitation (4 years)	ACT1_SOYBN	AEYDESGPSIVHKK
Early rehabilitation (4 years)	ACT1_SOYBN	VAPEEHPVLLTEAPLNPK
Early rehabilitation (4 years)	M0RJ32_MUSAM	FLETTAEAAAAEGR
Early rehabilitation (4 years)	U5CQ08_AMBTC	GLSQLEEMR
Early rehabilitation (4 years)	D8SFE9_SELML	ANPASPVWASYQK
Early rehabilitation (4 years)	ACT_AJECG	SYELPDGQVITIGNER
Early rehabilitation (4 years)	D8SCV5_SELML	GKDTLAQSTEVR
Early rehabilitation (4 years)	RL17_PARD8	VVFSNLQDK
Early rehabilitation (4 years)	A9TSN9_PHYPA	EERERER
Early rehabilitation (4 years)	RL19_PHEZH	MNVIEQLR
Early rehabilitation (4 years)	PSA1_YEAST	QQEITTNLENHFK
Early rehabilitation (4 years)	GPD_HYPAT	LQGTSTAFEVNSFLTAR
Early rehabilitation (4 years)	MUKB_PASMU	GADGWLR
Early rehabilitation (4 years)	ACT1_SCHCO	SYELPDGQVITIGNER
Early rehabilitation (4 years)	ACT1_SCHCO	VAPEEHPVLLTEAPLNPK
Early rehabilitation (4 years)	D8RW49_SELML	QGVGSNPR
Early rehabilitation (4 years)	SPO14_YEAST	SNVSTASGTHFAPPQADR
Early rehabilitation (4 years)	A9SHT3_PHYPA	ESVSYGAR
Early rehabilitation (4 years)	SECA_ROSS1	TIESAQTR
Early rehabilitation (4 years)	EF1A1_MUCCL	IGGIGTVPVGR
Early rehabilitation (4 years)	EF1A1_MUCCL	TIEEFEKEAAELGK
Early rehabilitation (4 years)	CH601_NITWN	AVAAGMNPMDLKR
Early rehabilitation (4 years)	A9SFC9_PHYPA	EAGALGGSSR
Early rehabilitation (4 years)	D8QV82_SELML	APVEEDEK
Early rehabilitation (4 years)	NAT1_YEAST	DLATLQSQIGDFK
Early rehabilitation (4 years)	NAT1_YEAST	YRDDVPIGSSNLK
Early rehabilitation (4 years)	A9SNZ3_PHYPA	QYQEELK
Early rehabilitation (4 years)	SPEA_PROM2	YIDVGGGLGIDFDGTK
Early rehabilitation (4 years)	CH60_HYPNA	AAVEEGIVPGGGVALLR
Early rehabilitation (4 years)	RPOC_ZYMMO	TGEVVLVGTDGR
Early rehabilitation (4 years)	DBP2_ASPNC	SFYKEHADVAER
Early rehabilitation (4 years)	GLPK_STRP1,GLPK_STRP6,GLPK_STRP8,GLPK_STRPB,GLPK_STRPC,GLPK_STRPD,GLPK_STRPG,GLPK_STRPM,GLPK_STRPZ	LTDGAVHVTDYSNAAR
Early rehabilitation (4 years)	MUKB_YERP3,MUKB_YERPA,MUKB_YERPE,MUKB_YERPG,MUKB_YERPN,MUKB_YERPP,MUKB_YERPS,MUKB_YERPY	GADGWLR
Early rehabilitation (4 years)	CH60_THIDA	AAVEEGIVPGGGVALLR
Early rehabilitation (4 years)	DAPAT_PROMS	LQNSGYK
Early rehabilitation (4 years)	D8RZ00_SELML	LQEAHEESK
Early rehabilitation (4 years)	LIS11_POSPM	YTALQEDIAAGPAR
Early rehabilitation (4 years)	ACT_MESVI	SYELPDGQVITIGNER
Early rehabilitation (4 years)	ACT_MESVI	VAPEEHPVLLTEAPLNPK
Early rehabilitation (4 years)	LPTD_NITMU	AELSAGPQFISAER
Early rehabilitation (4 years)	W1PL18_AMBTC	ERDREKERERDR
Early rehabilitation (4 years)	W1PL18_AMBTC	ERERDREKDRER
Early rehabilitation (4 years)	VPS25_SCHPO	NPKDVFWVYWR
Early rehabilitation (4 years)	CH60_ACICJ	AVAAGMNPMDLKR
Early rehabilitation (4 years)	CH604_RHILO	AVAAGMNPMDLKR
Early rehabilitation (4 years)	CH604_RHILO	MIAEAMQK
Early rehabilitation (4 years)	M0SV91_MUSAM	ERERERESRER
Early rehabilitation (4 years)	M0SV91_MUSAM	SYSVLTDR
Early rehabilitation (4 years)	MBF1_EMENI	FASGNSAGR
Early rehabilitation (4 years)	A9U0J4_PHYPA	QVESVDFSEHLTK
Early rehabilitation (4 years)	SYA_METCA	AEVEQSLR
Early rehabilitation (4 years)	D8RIT4_SELML	ATAWLAGWTEVFQR
Early rehabilitation (4 years)	DNAJ_SHEFN	YNLELSLEEAVR
Early rehabilitation (4 years)	CH60_HAEDU	AVAAGMNPMDLKR
Early rehabilitation (4 years)	SUB8_COCP7	VSHRDSLTMGTFNK
Early rehabilitation (4 years)	D8SF12_SELML	EERERER
Early rehabilitation (4 years)	HSP72_PARBA	TTPSFVAFTDTER
Intermediate rehabilitation (12 years)	U5D2B7_AMBTC	EVENTIFGESGEK
Intermediate rehabilitation (12 years)	A9SEL4_PHYPA	EAQNAGQLK
Intermediate rehabilitation (12 years)	A9SEL4_PHYPA	EGISGLNGTTALASKAGK
Intermediate rehabilitation (12 years)	D8S9G7_SELML	GEAIDSTGLQEVNLR
Intermediate rehabilitation (12 years)	RHO_RICBR	VLTGGVDANALQRPK
Intermediate rehabilitation (12 years)	RPOC_PARL1	ILEDQGGATPTASTEIK
Intermediate rehabilitation (12 years)	D8SBC9_SELML	AYRYFDR
Intermediate rehabilitation (12 years)	CH60_POLNS	AAVEEGIIPGGGVALIR
Intermediate rehabilitation (12 years)	CH60_POLNS	VDDALHATR
Intermediate rehabilitation (12 years)	ACT_SCHDU	DLTDNLMTILMER
Intermediate rehabilitation (12 years)	ACT_SCHDU	EITAVAPSSMK
Intermediate rehabilitation (12 years)	ACT_SCHDU	VAPEEHPVLLTEAPLNPK
Intermediate rehabilitation (12 years)	A0A0A8K8D1_ANACO	EAYPGDVFYLHSR
Intermediate rehabilitation (12 years)	ACTG_PENCH	IWHHTFYNELR
Intermediate rehabilitation (12 years)	ACTG_PENCH	SYELPDGQVITIGNER
Intermediate rehabilitation (12 years)	SEC31_DEBHA	QGTVHSR
Intermediate rehabilitation (12 years)	PNP_ACIC5	FMLHYNFPPFSVGEVGR
Intermediate rehabilitation (12 years)	A9RRV1_PHYPA	IGSDGSLLREEITCFK
Intermediate rehabilitation (12 years)	ZA15_ENCCU	KEASVQESIDFMR
Intermediate rehabilitation (12 years)	CH60_METSB	VGNEGVITVEEAK
Intermediate rehabilitation (12 years)	CH60_METI4	AAVEEGIVPGGGVALLR
Intermediate rehabilitation (12 years)	CH601_POLNA	AAVEEGIVPGGGVALLR
Intermediate rehabilitation (12 years)	CH601_ERYLH	VDDALHATR
Intermediate rehabilitation (12 years)	CH601_ERYLH	VGNEGVITVEEAK
Intermediate rehabilitation (12 years)	RHO_CHRVO	VLTGGVDANALQRPK
Intermediate rehabilitation (12 years)	EFTU_FLESI	EHILLAR
Intermediate rehabilitation (12 years)	NDUA4_SCHPO	VPVELYPLGAAVATAVGFATYSMGK
Intermediate rehabilitation (12 years)	ACT_ENCCU	APELLFQPK
Intermediate rehabilitation (12 years)	ACT_ENCCU	GVMVGMGQK
Intermediate rehabilitation (12 years)	ACT_ENCCU	IWHHTFYNELR
Intermediate rehabilitation (12 years)	ACT_ENCCU	VAPEEHPVLLTEAPLNPK
Intermediate rehabilitation (12 years)	CH603_NITHX	GVDILANAVK
Intermediate rehabilitation (12 years)	W1NGD9_AMBTC	EREKERERER
Intermediate rehabilitation (12 years)	CH104_RHILO,CH105_RHILO,CH10_BRUA1,CH10_BRUA2,CH10_BRUAB,CH10_BRUC2,CH10_BRUMB,CH10_BRUME,CH10_BRUSI,CH10_BRUSU	FRPLHDR
Intermediate rehabilitation (12 years)	CH104_RHILO,CH105_RHILO,CH10_BRUA1,CH10_BRUA2,CH10_BRUAB,CH10_BRUC2,CH10_BRUMB,CH10_BRUME,CH10_BRUSI,CH10_BRUSU	LVPLDVK
Intermediate rehabilitation (12 years)	CH601_RHOPS	AAVEEGIVPGGGVALLR
Intermediate rehabilitation (12 years)	CH601_RHOPS	GVDILANAVK
Intermediate rehabilitation (12 years)	CH601_RHOPS	VGNEGVITVEEAK
Intermediate rehabilitation (12 years)	EFG_ACIF2,EFG_ACIF5	EFINPTEK
Intermediate rehabilitation (12 years)	CH60_CLOB8	LAGGVAVIK
Intermediate rehabilitation (12 years)	ACT_MESVI	EITALAPSSMKIK
Intermediate rehabilitation (12 years)	ACT_MESVI	SYELPDGQVITIGNER
Intermediate rehabilitation (12 years)	ACT_MESVI	VAPEEHPVLLTEAPLNPK
Intermediate rehabilitation (12 years)	CH60_STRU0	LAGGVAVIK
Intermediate rehabilitation (12 years)	R27AB_ARATH	ESTLHLVLR
Intermediate rehabilitation (12 years)	CH602_SYNFM	AAVEEGIVPGGGVALLR
Intermediate rehabilitation (12 years)	CH60_SOLUE	AAVEEGIVPGGGVALLR
Intermediate rehabilitation (12 years)	CH60_SOLUE	LAGGVAVIK
Intermediate rehabilitation (12 years)	A9TKC0_PHYPA	DHVESLSVHAYITK
Intermediate rehabilitation (12 years)	A0A0G2QXB6_SALEU,A0A0G2QXH7_SALBI,A0A0G2QXL3_9CARY	EAYPGDVFYLHSR
Intermediate rehabilitation (12 years)	M0SUK5_MUSAM	ESTLHLVLR
Intermediate rehabilitation (12 years)	CH60_BACMF	LAGGVAVIK
Intermediate rehabilitation (12 years)	ACT_AJECG	IWHHTFYNELR
Intermediate rehabilitation (12 years)	ACT_AJECG	SYELPDGQVITIGNER
Intermediate rehabilitation (12 years)	U5DCH9_AMBTC	SQVMVIGDGVDAAK
Intermediate rehabilitation (12 years)	A9TSN9_PHYPA	ELVQQIYNDIRK
Intermediate rehabilitation (12 years)	CH603_BRASB	GVDILANAVK
Intermediate rehabilitation (12 years)	CH603_BRASB	VDDALHATR
Intermediate rehabilitation (12 years)	CH603_BRASB	VGNEGVITVEEAK
Intermediate rehabilitation (12 years)	M0STN7_MUSAM	EITALAPSSMKIK
Intermediate rehabilitation (12 years)	NOG1_YEAST	SLVEQVARDYVR
Intermediate rehabilitation (12 years)	ACT1_SCHCO	IWHHTFYNELR
Intermediate rehabilitation (12 years)	ACT1_SCHCO	SYELPDGQVITIGNER
Intermediate rehabilitation (12 years)	ACT1_SCHCO	VAPEEHPVLLTEAPLNPK
Intermediate rehabilitation (12 years)	B9RZK5_RICCO	NGLAESR
Intermediate rehabilitation (12 years)	EFTU_XYLFA,EFTU_XYLFT	EHILLAR
Intermediate rehabilitation (12 years)	M0TND7_MUSAM	ESTLHLVLR
Intermediate rehabilitation (12 years)	M0TND7_MUSAM	TITLEVESSDTIDNQR
Intermediate rehabilitation (12 years)	DPYS_LACK1	NGIICTASDIYAAEIAVNNGK
Intermediate rehabilitation (12 years)	MCPA_ARTBC	IITDLNLDTWK
Intermediate rehabilitation (12 years)	CH602_AZOC5	AAVEEGIVPGGGVALLR
Intermediate rehabilitation (12 years)	CH602_AZOC5	GVDILANAVK
Intermediate rehabilitation (12 years)	CH602_AZOC5	VDDALHATR
Intermediate rehabilitation (12 years)	CH602_AZOC5	VGNEGVITVEEAK
Intermediate rehabilitation (12 years)	CH60_FERNB	LAGGVAVIK
Intermediate rehabilitation (12 years)	CH601_NITWN	VGNEGVITVEEAK
Intermediate rehabilitation (12 years)	CH60_HALOH	LAGGVAVIK
Intermediate rehabilitation (12 years)	CH601_MYCUA	LAGGVAVIK
Intermediate rehabilitation (12 years)	CH603_RHIL3	GVDILANAVK
Intermediate rehabilitation (12 years)	CH603_RHIL3	VDDALHATR
Intermediate rehabilitation (12 years)	A9SNZ3_PHYPA	DKDRDREKEK
Intermediate rehabilitation (12 years)	A9SNZ3_PHYPA	EPVGSLTPMLGDNK
Intermediate rehabilitation (12 years)	A9SNZ3_PHYPA	EREKERERER
Intermediate rehabilitation (12 years)	CH60_HYPNA	AAVEEGIVPGGGVALLR
Intermediate rehabilitation (12 years)	CH60_HYPNA	LAGGVAVIK
Intermediate rehabilitation (12 years)	CH60_HYPNA	QIAENAGVEGSVVVNTILNNKSR
Intermediate rehabilitation (12 years)	CH60_HYPNA	VGNEGVITVEEAK
Intermediate rehabilitation (12 years)	U5CYA3_AMBTC	FPGYLSGNER
Intermediate rehabilitation (12 years)	CH60_THIDA	AAVEEGIVPGGGVALLR
Intermediate rehabilitation (12 years)	CH60_THIDA	LAGGVAVIK
Intermediate rehabilitation (12 years)	W1PIB2_AMBTC	GGIPICFPQFGSHGSLEQHGFAR
Intermediate rehabilitation (12 years)	RL401_SCHPO,RL402_SCHPO,RL40_CRYNJ	ESTLHLVLR
Intermediate rehabilitation (12 years)	DEOC_FINM2	ASGGIHSR
Intermediate rehabilitation (12 years)	AROC_SULDN	HDPCVAIR
Intermediate rehabilitation (12 years)	RL7_BRADU,RL7_BRASO,RL7_RHOP2,RL7_RHOP5,RL7_RHOPB	AITGLGLK
Intermediate rehabilitation (12 years)	RL7_BRADU,RL7_BRASO,RL7_RHOP2,RL7_RHOP5,RL7_RHOPB	IVDDLSSLTVLEAAELAK
Intermediate rehabilitation (12 years)	SUCC_HAMD5	VSQFSQIFMNLAK
Intermediate rehabilitation (12 years)	CH601_SYNS3	LAGGVAVIK
Intermediate rehabilitation (12 years)	DNAK_RHOPB	IQASGGLSEADINK
Intermediate rehabilitation (12 years)	TRUA_CLOBB	TVQGCLEK
Intermediate rehabilitation (12 years)	CH602_METCA	LAGGVAVIK
Intermediate rehabilitation (12 years)	TIM10_CRYNB,TIM10_CRYNJ	IEMAVAELDMITDVFNR
Intermediate rehabilitation (12 years)	ISCS_PSEMY	GVAHFYASK
Intermediate rehabilitation (12 years)	CH60_ACICJ	VDDALHATR
Intermediate rehabilitation (12 years)	CH60_ACICJ	VGNEGVITVEEAK
Intermediate rehabilitation (12 years)	CH60_ACIB3	LAGGVAVIK
Intermediate rehabilitation (12 years)	CH60_ACIB3	VDDALHATR
Intermediate rehabilitation (12 years)	CH604_RHILO	VGNEGVITVEEAK
Intermediate rehabilitation (12 years)	M0SV91_MUSAM	ERERERESRER
Intermediate rehabilitation (12 years)	CH60_CUPNH	AAVEEGIVPGGGVALLR
Intermediate rehabilitation (12 years)	CH60_CUPNH	AGLNDLGQAK
Intermediate rehabilitation (12 years)	CH60_CUPNH	EIAQVGAISANSDTSIGER
Intermediate rehabilitation (12 years)	CH60_CUPNH	LAGGVAVIK
Intermediate rehabilitation (12 years)	M0SDI8_MUSAM	VRDWERERERER
Intermediate rehabilitation (12 years)	M0TSZ2_MUSAM	TVLADEQIHGFK
Intermediate rehabilitation (12 years)	W1PL18_AMBTC	DREKERERDKER
Intermediate rehabilitation (12 years)	W1PL18_AMBTC	ELELREREMR
Intermediate rehabilitation (12 years)	A9SEL4_PHYPA	DADRERERERERER
Intermediate rehabilitation (12 years)	A9SEL4_PHYPA	EPNFDSRR
Intermediate rehabilitation (12 years)	A9SEL4_PHYPA	EREREREREK
Intermediate rehabilitation (12 years)	CH101_RHIME	GGIIIPDTAK
Intermediate rehabilitation (12 years)	A0A0B0NIP7_GOSAR	QEIEWVMPNIS
Intermediate rehabilitation (12 years)	A9T329_PHYPA	KEALATK
Intermediate rehabilitation (12 years)	SYD_MYCPN	QLLMVGGTEK
Intermediate rehabilitation (12 years)	G6PD2_SCHPO	AHPNGMVTR
Intermediate rehabilitation (12 years)	ARLY_LEPIN	GLPSTYNR
Intermediate rehabilitation (12 years)	A9TAZ0_PHYPA	ERDRDRDR
Intermediate rehabilitation (12 years)	A9S1M9_PHYPA	KEALATK
Intermediate rehabilitation (12 years)	A9U5U3_PHYPA	LQQQQQH
Intermediate rehabilitation (12 years)	SYDND_PSYA2	IPGGASLSR
Intermediate rehabilitation (12 years)	M0S7F1_MUSAM	AAAQAATITTEPSQADTLQP
Intermediate rehabilitation (12 years)	A9TXZ0_PHYPA	SMATTPTR
Intermediate rehabilitation (12 years)	A9RPH0_PHYPA	EPIVSNFDNPIR
Intermediate rehabilitation (12 years)	ACT_SCHDU	VAPEEHPVLLTEAPLNPK
Intermediate rehabilitation (12 years)	HSLU_WIGBR	GEISGPDVSREGVQR
Intermediate rehabilitation (12 years)	A9TNW8_PHYPA	VYNEFNNMIR
Intermediate rehabilitation (12 years)	ACTG_PENCH	EITALAPSSMKVK
Intermediate rehabilitation (12 years)	ACTG_PENCH	SYELPDGQVITIGNER
Intermediate rehabilitation (12 years)	A9SKT8_PHYPA	SLPTIDKETLK
Intermediate rehabilitation (12 years)	VPS10_PYRTR	MQGLEGVAVANVIVNVDEVNK
Intermediate rehabilitation (12 years)	CH60_METSB	ALEGLTVENADQK
Intermediate rehabilitation (12 years)	CH60_METSB	LAGGVAVIR
Intermediate rehabilitation (12 years)	CH60_METSB	VGNEGVITVEEAK
Intermediate rehabilitation (12 years)	ATPA_ACIC5	EPMMTGLK
Intermediate rehabilitation (12 years)	CH60_METI4	AAVEEGIVPGGGVALLR
Intermediate rehabilitation (12 years)	M0TND7_MUSAM	ESTLHLVLR
Intermediate rehabilitation (12 years)	CH601_POLNA	AAVEEGIVPGGGVALLR
Intermediate rehabilitation (12 years)	CH601_POLNA	GFLSPYFINNAER
Intermediate rehabilitation (12 years)	M0SLT2_MUSAM	LQSSLQAMQSK
Intermediate rehabilitation (12 years)	RPOC_RHORT	LHTIDENGAPVIR
Intermediate rehabilitation (12 years)	A9T945_PHYPA	KEALATK
Intermediate rehabilitation (12 years)	A9TMC3_PHYPA	KEALATK
Intermediate rehabilitation (12 years)	RPOB_SPHWW	VGDVVNAGDIIADGPSTEFGELALGR
Intermediate rehabilitation (12 years)	MVP1_CRYNJ	ATASASEGR
Intermediate rehabilitation (12 years)	Q93XS1_PRUPE	SVALTPR
Intermediate rehabilitation (12 years)	CH601_ERYLH	LAGGVAVIR
Intermediate rehabilitation (12 years)	CH601_ERYLH	VGNEGVITVEEAK
Intermediate rehabilitation (12 years)	CH603_RHIL3	AAVEEGILPGGGVALLR
Intermediate rehabilitation (12 years)	CH603_RHIL3	AQIEETTSDYDR
Intermediate rehabilitation (12 years)	CH603_RHIL3	AQIEETTSDYDREK
Intermediate rehabilitation (12 years)	CH603_RHIL3	LAGGVAVIR
Intermediate rehabilitation (12 years)	CH603_RHIL3	VGGSTEVEVKEK
Intermediate rehabilitation (12 years)	A9SMG1_PHYPA	KEALATK
Intermediate rehabilitation (12 years)	D8SBT0_SELML	MPHTQSSVR
Intermediate rehabilitation (12 years)	CH602_SYNFM	AAVEEGIVPGGGVALLR
Intermediate rehabilitation (12 years)	RL7_AGRFC,RL7_AGRVS,RL7_ANAD2,RL7_ANADE,RL7_ANADF,RL7_ANASK,RL7_MARMM,RL7_MYXXD,RL7_OCHA4,RL7_PARL1,RL7_RHIE6,RL7_RHIEC,RL7_RHILW,RL7_RHIME,RL7_RHISN,RL7_SINMW	AITGLGLK
Intermediate rehabilitation (12 years)	RL7_AGRFC,RL7_AGRVS,RL7_ANAD2,RL7_ANADE,RL7_ANADF,RL7_ANASK,RL7_MARMM,RL7_MYXXD,RL7_OCHA4,RL7_PARL1,RL7_RHIE6,RL7_RHIEC,RL7_RHILW,RL7_RHIME,RL7_RHISN,RL7_SINMW	EAKDLVEGAPK
Intermediate rehabilitation (12 years)	A9T4E9_PHYPA	KEALATK
Intermediate rehabilitation (12 years)	CH603_NITHX	AQIEETTSDYDR
Intermediate rehabilitation (12 years)	CH603_NITHX	AQIEETTSDYDREK
Intermediate rehabilitation (12 years)	CH603_NITHX	LAGGVAVIR
Intermediate rehabilitation (12 years)	W1NGD9_AMBTC	EKERERERER
Intermediate rehabilitation (12 years)	ALPS_LIMPO,ALPS_TACTR	SGAVEHSVR
Intermediate rehabilitation (12 years)	CH601_RHOPS	AAVEEGIVPGGGVALLR
Intermediate rehabilitation (12 years)	CH601_RHOPS	AQIEETTSDYDR
Intermediate rehabilitation (12 years)	CH601_RHOPS	AQIEETTSDYDREK
Intermediate rehabilitation (12 years)	CH601_RHOPS	FLSDAMK
Intermediate rehabilitation (12 years)	CH601_RHOPS	LAGGVAVIR
Intermediate rehabilitation (12 years)	CH601_RHOPS	VGNEGVITVEEAK
Intermediate rehabilitation (12 years)	M0SG80_MUSAM	DRDKDRDR
Intermediate rehabilitation (12 years)	M0SG80_MUSAM	ERDRDRDR
Intermediate rehabilitation (12 years)	AATM_SCHPO	NMGLYGER
Intermediate rehabilitation (12 years)	CH60_CLOB6	IADLTSDIIDVK
Intermediate rehabilitation (12 years)	CH60_CLOB6	LAGGVAVIR
Intermediate rehabilitation (12 years)	CH60_SOLUE	AAVEEGIVPGGGVALLR
Intermediate rehabilitation (12 years)	CH60_SOLUE	DGVITVEESK
Intermediate rehabilitation (12 years)	CH60_SOLUE	GYLSPYFVSDAER
Intermediate rehabilitation (12 years)	CH60_SOLUE	LAGGVAVIK
Intermediate rehabilitation (12 years)	CH60_BACMF	LAGGVAVIK
Intermediate rehabilitation (12 years)	ACSA_METSB	VYPVTAEWSK
Intermediate rehabilitation (12 years)	A9T9K2_PHYPA	STSTQQDIK
Intermediate rehabilitation (12 years)	R27AB_ARATH	ESTLHLVLR
Intermediate rehabilitation (12 years)	A9RT69_PHYPA	KEALATK
Intermediate rehabilitation (12 years)	CH60_HALOH	LAGGVAVIK
Intermediate rehabilitation (12 years)	GUAA_STRP2,GUAA_STRP4,GUAA_STRP7,GUAA_STRPI,GUAA_STRPJ,GUAA_STRPN,GUAA_STRPS,GUAA_STRR6,GUAA_STRZJ,GUAA_STRZP,GUAA_STRZT	ALGTELGMPDHIVWR
Intermediate rehabilitation (12 years)	M0SUK5_MUSAM	ESTLHLVLR
Intermediate rehabilitation (12 years)	RL7_NEIG1,RL7_NEIG2,RL7_NEILA,RL7_NEIM0,RL7_NEIMA,RL7_NEIMB,RL7_NEIMF,RL7_NEIMH,RL7_NEIPE,RL7_NEISI	AITGLGLK
Intermediate rehabilitation (12 years)	RL7_NEIG1,RL7_NEIG2,RL7_NEILA,RL7_NEIM0,RL7_NEIMA,RL7_NEIMB,RL7_NEIMF,RL7_NEIMH,RL7_NEIPE,RL7_NEISI	TEFDVVLASAGDQK
Intermediate rehabilitation (12 years)	A9T0H0_PHYPA	DADRERERERERER
Intermediate rehabilitation (12 years)	CH60_THIDA	AAVEEGIVPGGGVALLR
Intermediate rehabilitation (12 years)	CH60_THIDA	LAGGVAVIK
Intermediate rehabilitation (12 years)	W1PIU2_AMBTC	EREREREREK
Intermediate rehabilitation (12 years)	ACT_AJECG	DLTNYLMKILAER
Intermediate rehabilitation (12 years)	ACT_AJECG	EITALAPSSMKVK
Intermediate rehabilitation (12 years)	ACT_AJECG	SYELPDGQVITIGNER
Intermediate rehabilitation (12 years)	ACT_AJECG	VAPEEHPVLLTEAPINPK
Intermediate rehabilitation (12 years)	GUAC_LACS1	FGPMTFK
Intermediate rehabilitation (12 years)	A9RIV8_PHYPA	MSKDLCK
Intermediate rehabilitation (12 years)	CH603_BRASB	AAVEEGILPGGGVALLR
Intermediate rehabilitation (12 years)	CH603_BRASB	LAGGVAVIR
Intermediate rehabilitation (12 years)	CH603_BRASB	VGNEGVITVEEAK
Intermediate rehabilitation (12 years)	M0STN7_MUSAM	EIVRDMKEK
Intermediate rehabilitation (12 years)	M0STN7_MUSAM	GYSFTTTAEREIVR
Intermediate rehabilitation (12 years)	ACT1_SCHCO	SYELPDGQVITIGNER
Intermediate rehabilitation (12 years)	A9RBY0_PHYPA	KEALATK
Intermediate rehabilitation (12 years)	G6PI_PSYCK	IGMSGFK
Intermediate rehabilitation (12 years)	RPOB_PELPD	GADKDTR
Intermediate rehabilitation (12 years)	A9T3Y8_PHYPA	IHHEVCNSK
Intermediate rehabilitation (12 years)	A9T3Y8_PHYPA	KEALATK
Intermediate rehabilitation (12 years)	CH60_CELJU	LAGGVAVIK
Intermediate rehabilitation (12 years)	A9RMN5_PHYPA	KEALATK
Intermediate rehabilitation (12 years)	A9SF92_PHYPA	GISGTGQGFDAR
Intermediate rehabilitation (12 years)	A9U210_PHYPA	KEALATK
Intermediate rehabilitation (12 years)	CH60_EUBE2	LAGGVAVIR
Intermediate rehabilitation (12 years)	RL7_METNO	AITGLGLK
Intermediate rehabilitation (12 years)	RL7_METNO	LVDDLSSLTVLEAAELAK
Intermediate rehabilitation (12 years)	RL7_METNO	TEFTVVLAGAGDK
Intermediate rehabilitation (12 years)	CH602_AZOC5	AAVEEGIVPGGGVALLR
Intermediate rehabilitation (12 years)	CH602_AZOC5	AQIEETTSDYDR
Intermediate rehabilitation (12 years)	CH602_AZOC5	AQIEETTSDYDREK
Intermediate rehabilitation (12 years)	CH602_AZOC5	LAGGVAVIR
Intermediate rehabilitation (12 years)	CH602_AZOC5	VGNEGVITVEEAK
Intermediate rehabilitation (12 years)	CH60_FERNB	LAGGVAVIK
Intermediate rehabilitation (12 years)	A9RPV1_PHYPA	KEALATK
Intermediate rehabilitation (12 years)	CP51_SCHPO	SGLGFSQFR
Intermediate rehabilitation (12 years)	CH60_NITEU	AAVEEGIVPGGGVALLR
Intermediate rehabilitation (12 years)	CH60_NITEU	AVTGAVEELK
Intermediate rehabilitation (12 years)	CH601_NITWN	AAVEEGILPGGGVALLR
Intermediate rehabilitation (12 years)	CH601_NITWN	AQIEETTSDYDR
Intermediate rehabilitation (12 years)	CH601_NITWN	AQIEETTSDYDREK
Intermediate rehabilitation (12 years)	CH601_NITWN	LAGGVAVIR
Intermediate rehabilitation (12 years)	CH601_NITWN	VGNEGVITVEEAK
Intermediate rehabilitation (12 years)	A9RXD0_PHYPA	KEALATK
Intermediate rehabilitation (12 years)	A9SNZ3_PHYPA	DKDRERENHGAREK
Intermediate rehabilitation (12 years)	A9SNZ3_PHYPA	DRDKDRDR
Intermediate rehabilitation (12 years)	A9SNZ3_PHYPA	DREKERERDK
Intermediate rehabilitation (12 years)	A9SNZ3_PHYPA	DREREREREK
Intermediate rehabilitation (12 years)	A9SNZ3_PHYPA	EERERDR
Intermediate rehabilitation (12 years)	A9SNZ3_PHYPA	EKERERERER
Intermediate rehabilitation (12 years)	A9SNZ3_PHYPA	ENHGAREK
Intermediate rehabilitation (12 years)	A9SNZ3_PHYPA	EREREREREK
Intermediate rehabilitation (12 years)	CH60_HYPNA	AAVEEGIVPGGGVALLR
Intermediate rehabilitation (12 years)	CH60_HYPNA	LAGGVAVIK
Intermediate rehabilitation (12 years)	CH60_HYPNA	VGNEGVITVEEAK
Intermediate rehabilitation (12 years)	A9SNF2_PHYPA	ERDRDRDR
Intermediate rehabilitation (12 years)	CH101_RHOPA	GGIIIPDSAK
Intermediate rehabilitation (12 years)	A9TZG4_PHYPA	TDRLLDYR
Intermediate rehabilitation (12 years)	A9RGS2_PHYPA	SMATTPTR
Intermediate rehabilitation (12 years)	A9TC43_PHYPA	KEALATK
Intermediate rehabilitation (12 years)	Y1381_STAEQ	VKENEESK
Intermediate rehabilitation (12 years)	A9RSP6_PHYPA	KEALATK
Intermediate rehabilitation (12 years)	Q9SJJ0_ARATH	CIPHSDLR
Intermediate rehabilitation (12 years)	RL401_SCHPO,RL402_SCHPO,RL40_CRYNJ	ESTLHLVLR
Intermediate rehabilitation (12 years)	CH60_POLNS	LAGGVAVIR
Intermediate rehabilitation (12 years)	A9S3L6_PHYPA	SVQFLTLPPNHER
Intermediate rehabilitation (12 years)	RL7_BRADU,RL7_BRASO,RL7_RHOP2,RL7_RHOP5,RL7_RHOPB	AITGLGLK
Intermediate rehabilitation (12 years)	CH601_SYNS3	LAGGVAVIK
Intermediate rehabilitation (12 years)	CH601_SYNS3	VTMEDLGR
Intermediate rehabilitation (12 years)	RL27A_ENCCU	GLAGGFSHMK
Intermediate rehabilitation (12 years)	ACT_MESVI	GYSFTTTAEREIVR
Intermediate rehabilitation (12 years)	ACT_MESVI	SYELPDGQVITIGNER
Intermediate rehabilitation (12 years)	ACT_MESVI	VAPEEHPVLLTEAPLNPK
Intermediate rehabilitation (12 years)	W1PL18_AMBTC	DREKERERDK
Intermediate rehabilitation (12 years)	W1PL18_AMBTC	EKEKERERER
Intermediate rehabilitation (12 years)	W1PL18_AMBTC	ERDRDRDR
Intermediate rehabilitation (12 years)	W1PL18_AMBTC	ERERDREKEK
Intermediate rehabilitation (12 years)	W1PL18_AMBTC	EREREREREK
Intermediate rehabilitation (12 years)	D7M1R6_ARALL	QSQQYLQIYER
Intermediate rehabilitation (12 years)	A9RIR1_PHYPA	SMATTPTR
Intermediate rehabilitation (12 years)	CH602_METCA	LAGGVAVIK
Intermediate rehabilitation (12 years)	THIC_SYNSC	VNANIGASPNASDAAEEVK
Intermediate rehabilitation (12 years)	CH60_ACICJ	AAVEEGIVPGGGVALAR
Intermediate rehabilitation (12 years)	CH60_ACICJ	AQIEETTSDYDR
Intermediate rehabilitation (12 years)	CH60_ACICJ	AQIEETTSDYDREK
Intermediate rehabilitation (12 years)	CH60_ACICJ	LAGGVAVIR
Intermediate rehabilitation (12 years)	CH60_ACICJ	VGNEGVITVEEAK
Intermediate rehabilitation (12 years)	CH60_ACICJ	VLDNDDYSFGFDAQSGEFK
Intermediate rehabilitation (12 years)	CH60_ACIB3	LAGGVAVIK
Intermediate rehabilitation (12 years)	A9TEU0_PHYPA	KEALATK
Intermediate rehabilitation (12 years)	A9TEU0_PHYPA	TDRLLDYR
Intermediate rehabilitation (12 years)	CH604_RHILO	LAGGVAVIR
Intermediate rehabilitation (12 years)	CH604_RHILO	VGNEGVITVEEAK
Intermediate rehabilitation (12 years)	A9T1K7_PHYPA	GATGNSSKR
Intermediate rehabilitation (12 years)	A9T1K7_PHYPA	KEALATK
Intermediate rehabilitation (12 years)	A9SMH1_PHYPA	KEALATK
Intermediate rehabilitation (12 years)	CH60_CUPNH	AAVEEGIVPGGGVALLR
Intermediate rehabilitation (12 years)	CH60_CUPNH	LAGGVAVIK
Intermediate rehabilitation (12 years)	CH60_CUPNH	MAAKDVVFGDAAR
Intermediate rehabilitation (12 years)	CH60_CUPMC	AAIAGLHGENPDQNAGIK
Intermediate rehabilitation (12 years)	CH60_CUPMC	AAVEEGIVPGGGVALLR
Intermediate rehabilitation (12 years)	CH60_CUPMC	LAGGVAVIK
Intermediate rehabilitation (12 years)	CH60_CUPMC	MAAKDVVFGDAAR
Intermediate rehabilitation (12 years)	3MGH_LEIXX	TGVSGAGGGAAFPWR
Intermediate rehabilitation (12 years)	STI1_YEAST	DITYLNNR
Intermediate rehabilitation (12 years)	RF1_DESOH	FESGIHR
Intermediate rehabilitation (12 years)	A9RT96_PHYPA	KEALATK
Intermediate rehabilitation (12 years)	CH101_RHIME	ASTNFRPLHDR
Intermediate rehabilitation (12 years)	CH101_RHIME	GGIIIPDTAK
Intermediate rehabilitation (12 years)	M5_STRP5	RDLDASR
Intermediate rehabilitation (12 years)	RHO_RICBR	VLTGGVDANALQRPK
Intermediate rehabilitation (12 years)	A9RQ53_PHYPA	GEPVENTR
Intermediate rehabilitation (12 years)	PAM_STRPY	RDLDASR
Intermediate rehabilitation (12 years)	M0SCG2_MUSAM	FGTFDIK
Intermediate rehabilitation (12 years)	ACT_SCHDU	VAPEEHPVLLTEAPLNPK
Intermediate rehabilitation (12 years)	MCA1B_NEOFI	EAAQDLFSAISSYGK
Intermediate rehabilitation (12 years)	D8SGZ7_SELML	VSPGPFFLGRMAR
Intermediate rehabilitation (12 years)	M0SJQ9_MUSAM	TQRERERERER
Intermediate rehabilitation (12 years)	RL7_NEIG1,RL7_NEIG2,RL7_NEILA,RL7_NEIM0,RL7_NEIMA,RL7_NEIMB,RL7_NEIMF,RL7_NEIMH,RL7_NEIPE,RL7_NEISI	AITGLGLK
Intermediate rehabilitation (12 years)	ACTG_PENCH	SYELPDGQVITIGNER
Intermediate rehabilitation (12 years)	CARB2_AQUAE	QPPSGTAR
Intermediate rehabilitation (12 years)	A9TZG4_PHYPA	LESFIFQQSK
Intermediate rehabilitation (12 years)	CH60_METSB	APGFGDRR
Intermediate rehabilitation (12 years)	CH60_METSB	LAGGVAVIR
Intermediate rehabilitation (12 years)	CH60_METSB	VGNEGVITVEEAK
Intermediate rehabilitation (12 years)	A9SYV0_PHYPA	LSIPWQVDNTSASVSLPVSGGVSSLGENGRSR
Intermediate rehabilitation (12 years)	A9S8G6_PHYPA	ELITSIGLGNNDK
Intermediate rehabilitation (12 years)	CH601_ERYLH	APGFGDRR
Intermediate rehabilitation (12 years)	CH601_ERYLH	LAGGVAVIR
Intermediate rehabilitation (12 years)	CH601_ERYLH	VGNEGVITVEEAK
Intermediate rehabilitation (12 years)	CH603_RHIL3	AAVEEGILPGGGVALLR
Intermediate rehabilitation (12 years)	CH603_RHIL3	APGFGDRR
Intermediate rehabilitation (12 years)	CH603_RHIL3	LAGGVAVIR
Intermediate rehabilitation (12 years)	RHO_CHRVO	VLTGGVDANALQRPK
Intermediate rehabilitation (12 years)	W1NVH3_AMBTC	GKERDKEREKDREKEREHDRDREKEREHDRDRER
Intermediate rehabilitation (12 years)	RL7_AGRFC,RL7_AGRVS,RL7_ANAD2,RL7_ANADE,RL7_ANADF,RL7_ANASK,RL7_MARMM,RL7_MYXXD,RL7_OCHA4,RL7_PARL1,RL7_RHIE6,RL7_RHIEC,RL7_RHILW,RL7_RHIME,RL7_RHISN,RL7_SINMW	AITGLGLK
Intermediate rehabilitation (12 years)	MURE_PEPD6	EQAIAEAISMAK
Intermediate rehabilitation (12 years)	A9TKS0_PHYPA	VKDTSPSLEEK
Intermediate rehabilitation (12 years)	G3P_SORMA	TAAQNIIPSSTGAAK
Intermediate rehabilitation (12 years)	CH603_NITHX	APGFGDRR
Intermediate rehabilitation (12 years)	CH603_NITHX	LAGGVAVIR
Intermediate rehabilitation (12 years)	D8SR35_SELML	QLQEMLSGR
Intermediate rehabilitation (12 years)	CH60_RHOMR	APGFGDRR
Intermediate rehabilitation (12 years)	CH60_RHOMR	LAGGVAVLK
Intermediate rehabilitation (12 years)	CH60_RHOMR	QQIEETTSDYDR
Intermediate rehabilitation (12 years)	M12_STRPY	RDLDASR
Intermediate rehabilitation (12 years)	ACT1_SOYBN	TTGIVLDSGDGVSHTVPIYEGYALPHAILR
Intermediate rehabilitation (12 years)	ACT1_SOYBN	VAPEEHPVLLTEAPLNPK
Intermediate rehabilitation (12 years)	CH601_RHOPS	AAVEEGIVPGGGVALLR
Intermediate rehabilitation (12 years)	CH601_RHOPS	APGFGDRR
Intermediate rehabilitation (12 years)	CH601_RHOPS	GIIDPTK
Intermediate rehabilitation (12 years)	CH601_RHOPS	LAGGVAVIR
Intermediate rehabilitation (12 years)	CH601_RHOPS	VGNEGVITVEEAK
Intermediate rehabilitation (12 years)	A9S5X5_PHYPA	GGVAYQQQGAGGPQR
Intermediate rehabilitation (12 years)	ATPG_GLUDA	GLAGAFNANINR
Intermediate rehabilitation (12 years)	ACT_MESVI	SYELPDGQVITIGNER
Intermediate rehabilitation (12 years)	ACT_MESVI	VAPEEHPVLLTEAPLNPK
Intermediate rehabilitation (12 years)	SECA_GEOMG	IAEETVEK
Intermediate rehabilitation (12 years)	RL3_AYWBP,RL3_ONYPE	GPESHGSR
Intermediate rehabilitation (12 years)	PHEB_PROMP	EFLSDLISNTEFQFER
Intermediate rehabilitation (12 years)	CH602_SYNFM	AAVEEGIVPGGGVALLR
Intermediate rehabilitation (12 years)	CH60_SOLUE	AAVEEGIVPGGGVALLR
Intermediate rehabilitation (12 years)	CH60_SOLUE	APGFGDRR
Intermediate rehabilitation (12 years)	A9U210_PHYPA	LESFIFQQSK
Intermediate rehabilitation (12 years)	CH60_BURTH	AAVEEGIVPGGGVALIR
Intermediate rehabilitation (12 years)	CH60_BURTH	APGFGDRR
Intermediate rehabilitation (12 years)	R27AB_ARATH	CGLTYVYQK
Intermediate rehabilitation (12 years)	R27AB_ARATH	EGIPPDQQR
Intermediate rehabilitation (12 years)	CH60_METI4	AAVEEGIVPGGGVALLR
Intermediate rehabilitation (12 years)	CH60_METI4	APGFGDRR
Intermediate rehabilitation (12 years)	CH60_METI4	EGLKNVTAGANPMDLK
Intermediate rehabilitation (12 years)	A9SNZ3_PHYPA	QELSQSQGDGDGEEGKLIFSDTGEFCR
Intermediate rehabilitation (12 years)	M0SG80_MUSAM	ERDRDRDRDR
Intermediate rehabilitation (12 years)	HIS1_CANGA	ESGIEEIDLLMDLGFGGCK
Intermediate rehabilitation (12 years)	ACT_AJECG	SYELPDGQVITIGNER
Intermediate rehabilitation (12 years)	ACT_AJECG	VAPEEHPVLLTEAPINPK
Intermediate rehabilitation (12 years)	CRWN1_ARATH	AQRESFEK
Intermediate rehabilitation (12 years)	SLT11_CRYNB,SLT11_CRYNJ	AAAAVEGSAAPA
Intermediate rehabilitation (12 years)	SFI1_YEAST	SIQASAYR
Intermediate rehabilitation (12 years)	CH603_BRASB	AAVEEGILPGGGVALLR
Intermediate rehabilitation (12 years)	CH603_BRASB	APGFGDRR
Intermediate rehabilitation (12 years)	CH603_BRASB	LAGGVAVIR
Intermediate rehabilitation (12 years)	CH603_BRASB	VGNEGVITVEEAK
Intermediate rehabilitation (12 years)	M0STN7_MUSAM	LSYIALDYEQELETAK
Intermediate rehabilitation (12 years)	M0STN7_MUSAM	TTGIVLDSGDGVSHTVPIYEGYALPHAILR
Intermediate rehabilitation (12 years)	ACT1_SCHCO	SYELPDGQVITIGNER
Intermediate rehabilitation (12 years)	CH601_POLNA	AAVEEGIVPGGGVALLR
Intermediate rehabilitation (12 years)	CH601_POLNA	APGFGDRR
Intermediate rehabilitation (12 years)	M0TND7_MUSAM	EGIPPDQQR
Intermediate rehabilitation (12 years)	RL7_METNO	AITGLGLK
Intermediate rehabilitation (12 years)	A9RZ96_PHYPA	QPYITATQMETKDLR
Intermediate rehabilitation (12 years)	CH602_AZOC5	AAVEEGIVPGGGVALLR
Intermediate rehabilitation (12 years)	CH602_AZOC5	APGFGDRR
Intermediate rehabilitation (12 years)	CH602_AZOC5	LAGGVAVIR
Intermediate rehabilitation (12 years)	CH602_AZOC5	VGNEGVITVEEAK
Intermediate rehabilitation (12 years)	M0RK43_MUSAM	GTAYTFFTAANAR
Intermediate rehabilitation (12 years)	TPS3_YEAST	INSLSSNISISQPVVFLHQDLDFAQYLALNCEADVFLVDALR
Intermediate rehabilitation (12 years)	CH60_NITEU	AAVEEGIVPGGGVALLR
Intermediate rehabilitation (12 years)	CH60_NITEU	APGFGDRR
Intermediate rehabilitation (12 years)	RPOC_BDEBA	TFTGPNK
Intermediate rehabilitation (12 years)	CH601_NITWN	AAVEEGILPGGGVALLR
Intermediate rehabilitation (12 years)	CH601_NITWN	APGFGDRR
Intermediate rehabilitation (12 years)	CH601_NITWN	LAGGVAVIR
Intermediate rehabilitation (12 years)	CH601_NITWN	VGNEGVITVEEAK
Intermediate rehabilitation (12 years)	A9TEU0_PHYPA	LESFIFQQSK
Intermediate rehabilitation (12 years)	D8RDW9_SELML	NAASATTNGR
Intermediate rehabilitation (12 years)	Y4676_PHOPR	LINDVSSFGSR
Intermediate rehabilitation (12 years)	Q1W203_TOBAC	QFPADSRK
Intermediate rehabilitation (12 years)	A9RYW3_PHYPA	QESNNLLVYASASSPR
Intermediate rehabilitation (12 years)	CH60_HYPNA	AAVEEGIVPGGGVALLR
Intermediate rehabilitation (12 years)	CH60_HYPNA	APGFGDRR
Intermediate rehabilitation (12 years)	CH60_HYPNA	VGNEGVITVEEAK
Intermediate rehabilitation (12 years)	CH60_THIDA	AAVEEGIVPGGGVALLR
Intermediate rehabilitation (12 years)	CH60_THIDA	APGFGDRR
Intermediate rehabilitation (12 years)	RL401_SCHPO,RL402_SCHPO,RL40_CRYNJ	EGIPPDQQR
Intermediate rehabilitation (12 years)	RL401_SCHPO,RL402_SCHPO,RL40_CRYNJ	LPPRATNCR
Intermediate rehabilitation (12 years)	RL401_SCHPO,RL402_SCHPO,RL40_CRYNJ	TITLEVESSDTIDNVK
Intermediate rehabilitation (12 years)	A9RT12_PHYPA	SLAFESHEISLSR
Intermediate rehabilitation (12 years)	CH60_POLNS	APGFGDRR
Intermediate rehabilitation (12 years)	CH60_POLNS	LAGGVAVIR
Intermediate rehabilitation (12 years)	RPOC_CAUCR	FTAEDVK
Intermediate rehabilitation (12 years)	RL7_BRADU,RL7_BRASO,RL7_RHOP2,RL7_RHOP5,RL7_RHOPB	AITGLGLK
Intermediate rehabilitation (12 years)	RL7_BRADU,RL7_BRASO,RL7_RHOP2,RL7_RHOP5,RL7_RHOPB	IVDDLSSLTVLEAAELAK
Intermediate rehabilitation (12 years)	NDOC_PSEAI	VAHQLDPQNWGNSPK
Intermediate rehabilitation (12 years)	RPOC2_SYNR3	ESAVLCR
Intermediate rehabilitation (12 years)	CH602_METCA	AAVEEGIVPGGGVALIR
Intermediate rehabilitation (12 years)	CH602_METCA	APGFGDRR
Intermediate rehabilitation (12 years)	CH60_ACICJ	AAVEEGIVPGGGVALAR
Intermediate rehabilitation (12 years)	CH60_ACICJ	APGFGDRR
Intermediate rehabilitation (12 years)	CH60_ACICJ	GVDLLANAVK
Intermediate rehabilitation (12 years)	CH60_ACICJ	LAGGVAVIR
Intermediate rehabilitation (12 years)	CH60_ACICJ	VGNEGVITVEEAK
Intermediate rehabilitation (12 years)	CH604_RHILO	APGFGDRR
Intermediate rehabilitation (12 years)	CH604_RHILO	LAGGVAVIR
Intermediate rehabilitation (12 years)	CH604_RHILO	VGNEGVITVEEAK
Intermediate rehabilitation (12 years)	Y041_AQUAE	SPYGEIDILAEFEGR
Intermediate rehabilitation (12 years)	W1PL18_AMBTC	EKERERDKERER
Intermediate rehabilitation (12 years)	W1PL18_AMBTC	ERDRDRDRDR
Intermediate rehabilitation (12 years)	W1PL18_AMBTC	ERDREKDRERDREKDR
Intermediate rehabilitation (12 years)	W1PL18_AMBTC	SSKEIYER
Intermediate rehabilitation (12 years)	CH60_CUPNH	AAVEEGIVPGGGVALLR
Intermediate rehabilitation (12 years)	CH60_CUPNH	APGFGDRR
Intermediate rehabilitation (12 years)	RF2_YERPS	IQDLSDR
Intermediate rehabilitation (12 years)	M6B_STRPY	RDLDASR
Advanced rehabilitation (14 years)	A9TQ54_PHYPA	ELMGEVSKEASLR
Advanced rehabilitation (14 years)	CH101_RHIME	GGIIIPDTAK
Advanced rehabilitation (14 years)	D8RCM1_SELML	ISSQAATVGGFHVPK
Advanced rehabilitation (14 years)	ATPA_MYCMS	EAYPGDVFYLHSR
Advanced rehabilitation (14 years)	ATPA_MYCMS	MSFNIKEISEMIEEQIR
Advanced rehabilitation (14 years)	RISB_LARHH	NPDIVNLESNLNGEGLR
Advanced rehabilitation (14 years)	A9S6F2_PHYPA	LSTADVVDKR
Advanced rehabilitation (14 years)	RS20_HAEDU	AASQTAFVEMQK
Advanced rehabilitation (14 years)	ALR_GEOMG	QAAVFAQSVAEAR
Advanced rehabilitation (14 years)	M0SCG2_MUSAM	FGTFDIK
Advanced rehabilitation (14 years)	GLYA_SHEB2,GLYA_SHEPC,GLYA_SHESW	AMVEVFLER
Advanced rehabilitation (14 years)	GLYA_SHEB2,GLYA_SHEPC,GLYA_SHESW	LYNIIPYGIDESGK
Advanced rehabilitation (14 years)	M0T1K6_MUSAM	TTPSPHLVENGR
Advanced rehabilitation (14 years)	GLYA_SHEON	AMVEVFLER
Advanced rehabilitation (14 years)	GLYA_SHEON	LYNIIPYGIDESGK
Advanced rehabilitation (14 years)	GLYA_SHEON	VMQAQGSQLTNK
Advanced rehabilitation (14 years)	AMPA_DINSH	GDTIEVINTDAEGR
Advanced rehabilitation (14 years)	ACT_SCHDU	VAPEEHPVLLTEAPLNPK
Advanced rehabilitation (14 years)	A0A0A8K8D1_ANACO	EAYPGDVFYLHSR
Advanced rehabilitation (14 years)	THIC_PSYCK	ITQNVREYAK
Advanced rehabilitation (14 years)	ACTG_PENCH	CDVDVRK
Advanced rehabilitation (14 years)	ACTG_PENCH	SYELPDGQVITIGNER
Advanced rehabilitation (14 years)	ACTG_PENCH	VAPEEHPILLTEAPINPK
Advanced rehabilitation (14 years)	YFMD_SCHPO	FFSVGDK
Advanced rehabilitation (14 years)	U5D4Z2_AMBTC	QGVGHER
Advanced rehabilitation (14 years)	D8TFS6_SELML	QYFVESNK
Advanced rehabilitation (14 years)	CH60_METSB	LAGGVAVIR
Advanced rehabilitation (14 years)	CH60_METSB	VGNEGVITVEEAK
Advanced rehabilitation (14 years)	SYR_XANP2	NVYAIFADHVR
Advanced rehabilitation (14 years)	RPN7_SCHPO	TLADVEVNHLK
Advanced rehabilitation (14 years)	CH601_POLNA	AAVEEGIVPGGGVALLR
Advanced rehabilitation (14 years)	CH601_POLNA	VGAATETELK
Advanced rehabilitation (14 years)	A9SZE0_PHYPA	EGNSSKR
Advanced rehabilitation (14 years)	ATP25_COCP7	ADLFDAFK
Advanced rehabilitation (14 years)	ATP25_COCP7	SDIDLALK
Advanced rehabilitation (14 years)	MNME_LACC3	GKDLSQVK
Advanced rehabilitation (14 years)	M0U9Z6_MUSAM	DIGLQSSTAATR
Advanced rehabilitation (14 years)	W1NEG4_AMBTC	SQAIINQTR
Advanced rehabilitation (14 years)	A9SH03_PHYPA	APGTGSAWK
Advanced rehabilitation (14 years)	A9TMF8_PHYPA	GNPGLTTGLSQSDAR
Advanced rehabilitation (14 years)	A9TMF8_PHYPA	TGMIHAIDAR
Advanced rehabilitation (14 years)	A9TMF8_PHYPA	VRFEDTSDK
Advanced rehabilitation (14 years)	M5W4G0_PRUPE	ANYNGRELLDEK
Advanced rehabilitation (14 years)	RL7_ANAD2,RL7_ANASK	AITGLGLK
Advanced rehabilitation (14 years)	M0SMQ8_MUSAM	VAVAMEGCAKELVAAEEVEAR
Advanced rehabilitation (14 years)	CH601_RHOPS	AAVEEGIVPGGGVALLR
Advanced rehabilitation (14 years)	CH601_RHOPS	AQIEETTSDYDR
Advanced rehabilitation (14 years)	CH601_RHOPS	LAGGVAVIR
Advanced rehabilitation (14 years)	CH601_RHOPS	VGNEGVITVEEAK
Advanced rehabilitation (14 years)	MUTS_ERYLH	GTLGIAHCDISTGR
Advanced rehabilitation (14 years)	DNLJ_ACIC1	VEKEVGTDAAYLCEPK
Advanced rehabilitation (14 years)	ACT_MESVI	SYELPDGQVITIGNER
Advanced rehabilitation (14 years)	ACT_MESVI	VAPEEHPVLLTEAPLNPK
Advanced rehabilitation (14 years)	CH602_SYNFM	AAVEEGIVPGGGVALLR
Advanced rehabilitation (14 years)	R27AB_ARATH	ESTLHLVLR
Advanced rehabilitation (14 years)	M0SUK5_MUSAM	EGISPDQQR
Advanced rehabilitation (14 years)	M0SUK5_MUSAM	ESTLHLVLR
Advanced rehabilitation (14 years)	M0SUK5_MUSAM	TLTGNTITLEVESSDTIANLK
Advanced rehabilitation (14 years)	ACT1_SOYBN	VAPEEHPVLLTEAPLNPK
Advanced rehabilitation (14 years)	W1PIG8_AMBTC	AASTGDK
Advanced rehabilitation (14 years)	M0TNC5_MUSAM	GLSLSLPR
Advanced rehabilitation (14 years)	ACT_AJECG	CDVDVRK
Advanced rehabilitation (14 years)	ACT_AJECG	SYELPDGQVITIGNER
Advanced rehabilitation (14 years)	ACT_AJECG	VAPEEHPVLLTEAPINPK
Advanced rehabilitation (14 years)	W1PD50_AMBTC	GALESNHK
Advanced rehabilitation (14 years)	CH603_BRASB	EIELEDK
Advanced rehabilitation (14 years)	CH603_BRASB	LAGGVAVIR
Advanced rehabilitation (14 years)	CH603_BRASB	VGNEGVITVEEAK
Advanced rehabilitation (14 years)	3MGH_CHLL7	SSSGRDLFGNEFFLLDAPSPQPSMICTSTR
Advanced rehabilitation (14 years)	M0STN7_MUSAM	VAPEEHPILLTEAPLNPK
Advanced rehabilitation (14 years)	ACT1_SCHCO	SYELPDGQVITIGNER
Advanced rehabilitation (14 years)	COG6_KLULA	LLDDFLSQFDIDNKK
Advanced rehabilitation (14 years)	RPOB_JANSC	DAAHIEALNQQFDTQKR
Advanced rehabilitation (14 years)	RL7_METNO	AITGLGLK
Advanced rehabilitation (14 years)	RL7_METNO	LVDDLSSLTVLEAAELAK
Advanced rehabilitation (14 years)	A9SHT3_PHYPA	AWTAEPIPDPR
Advanced rehabilitation (14 years)	SYH_RHOPA	ATSPSFIAGR
Advanced rehabilitation (14 years)	CH601_NITWN	AQIEETTSDYDR
Advanced rehabilitation (14 years)	CH601_NITWN	LAGGVAVIR
Advanced rehabilitation (14 years)	CH601_NITWN	VGNEGVITVEEAK
Advanced rehabilitation (14 years)	HDA3_YEAST	TQNGNTK
Advanced rehabilitation (14 years)	A9RXD0_PHYPA	EGNSSKR
Advanced rehabilitation (14 years)	CH601_MYCUA	VGAATETELK
Advanced rehabilitation (14 years)	Y3881_PHOLL	NAVENAQRELTSR
Advanced rehabilitation (14 years)	CH60_HYPNA	AAVEEGIVPGGGVALLR
Advanced rehabilitation (14 years)	CH60_HYPNA	EIELEDK
Advanced rehabilitation (14 years)	CH60_HYPNA	VGNEGVITVEEAK
Advanced rehabilitation (14 years)	SYGB_HAEPS	TLDSAEALAAANK
Advanced rehabilitation (14 years)	D8QWR5_SELML	DKDYRER
Advanced rehabilitation (14 years)	D8QWR5_SELML	ERDKDYR
Advanced rehabilitation (14 years)	D8QWR5_SELML	NARERER
Advanced rehabilitation (14 years)	A9TA97_PHYPA	LFAFESHEIR
Advanced rehabilitation (14 years)	A9TA97_PHYPA	VLNDGSAYVR
Advanced rehabilitation (14 years)	SSH4_CANGA	VGIYEFTTPIDR
Advanced rehabilitation (14 years)	A9RKI3_PHYPA	EHEIAARESVSYGAR
Advanced rehabilitation (14 years)	M0T2H3_MUSAM	EIHVNSEGLR
Advanced rehabilitation (14 years)	RPOC_ACHLI	NEIQSGIMKEFDK
Advanced rehabilitation (14 years)	A9RSP6_PHYPA	IPPTMPTVQPSTSLSK
Advanced rehabilitation (14 years)	CH60_POLNS	AAVEEGIIPGGGVALIR
Advanced rehabilitation (14 years)	CH60_POLNS	LAGGVAVIR
Advanced rehabilitation (14 years)	RL7_BRADU,RL7_BRASO,RL7_RHOP2,RL7_RHOP5,RL7_RHOPB	AITGLGLK
Advanced rehabilitation (14 years)	M0TND7_MUSAM	ESTLHLVLR
Advanced rehabilitation (14 years)	A9TKS0_PHYPA	EGNSSKR
Advanced rehabilitation (14 years)	RL7_NEIG1,RL7_NEIG2,RL7_NEILA,RL7_NEIM0,RL7_NEIMA,RL7_NEIMB,RL7_NEIMF,RL7_NEIMH,RL7_NEIPE,RL7_NEISI	AITGLGLK
Advanced rehabilitation (14 years)	A9RUQ4_PHYPA	DVLPNTLNYVEEFK
Advanced rehabilitation (14 years)	CH60_ACICJ	AQIEETTSDYDR
Advanced rehabilitation (14 years)	CH60_ACICJ	LAGGVAVIR
Advanced rehabilitation (14 years)	CH60_ACICJ	VGNEGVITVEEAK
Advanced rehabilitation (14 years)	CH604_RHILO	EIELEDK
Advanced rehabilitation (14 years)	CH604_RHILO	LAGGVAVIR
Advanced rehabilitation (14 years)	CH604_RHILO	VGNEGVITVEEAK
Advanced rehabilitation (14 years)	A9RD17_PHYPA	DKEVWNEK
Advanced rehabilitation (14 years)	A9RD17_PHYPA	EEQLTAQAAETER
Advanced rehabilitation (14 years)	THIM_BACC4	GVDAGTGNGDVVSIAR
Advanced rehabilitation (14 years)	RL401_SCHPO,RL402_SCHPO,RL40_CRYNJ	ESTLHLVLR
Advanced rehabilitation (14 years)	D8S639_SELML	GEVAGNYR
Advanced rehabilitation (14 years)	A9TKT6_PHYPA	TAAAGGGGQR
Advanced rehabilitation (14 years)	A9SMH1_PHYPA	KFEGFLGEVSGGESSK
Advanced rehabilitation (14 years)	CH602_SACEN	SAVANAASIAR
Advanced rehabilitation (14 years)	CH602_SACEN	VGAATETELK
Advanced rehabilitation (14 years)	ATG3_BOTFB	NFLHSTLDR
Advanced rehabilitation (14 years)	CH603_BRASB	LAGGVAVIR
Advanced rehabilitation (14 years)	CH603_BRASB	VGNEGVITVEEAK
Advanced rehabilitation (14 years)	ACT1_SCHCO	SYELPDGQVITIGNER
Advanced rehabilitation (14 years)	ISPH_CHLCH	VANYIEATYANSESIIAQ
Advanced rehabilitation (14 years)	CH60_EUBE2	LAGGVAVIR
Advanced rehabilitation (14 years)	CH60_FERNB	GYISPYFVTDPEK
Advanced rehabilitation (14 years)	SET1_ASPOR	EVGLDIEEEKR
Advanced rehabilitation (14 years)	URB2_SCHPO	VVNYALEYSSK
Advanced rehabilitation (14 years)	CH60_HALOH	VGQDGVISVEESK
Advanced rehabilitation (14 years)	U5DE02_AMBTC	NIGPGPQNVASGPSMAQAMTR
Advanced rehabilitation (14 years)	D8TF95_SELML	FFPGAGNR
Advanced rehabilitation (14 years)	VOA1_YEAST	TVQADSSK
Advanced rehabilitation (14 years)	RIMM_BDEBA	AAEVADR
Advanced rehabilitation (14 years)	DNAK_MAGSA	AKTESLMQASMK
Advanced rehabilitation (14 years)	M0SYX9_MUSAM	LGSQGLEVSR
Advanced rehabilitation (14 years)	M0SYX9_MUSAM	VELATKFGISFQDGK
Advanced rehabilitation (14 years)	D8T1Y1_SELML	TVSTVEGWAR
Advanced rehabilitation (14 years)	CH60_HYPNA	AAVEEGIVPGGGVALLR
Advanced rehabilitation (14 years)	CH60_HYPNA	VGNEGVITVEEAK
Advanced rehabilitation (14 years)	RL7_CAMJ8,RL7_CAMJD,RL7_CAMJE,RL7_CAMJJ,RL7_CAMJR	ALTGLGLK
Advanced rehabilitation (14 years)	CH60_STRU0	VGEYISEAMER
Advanced rehabilitation (14 years)	ISCS_NEIMB	GAAHFYK
Advanced rehabilitation (14 years)	M0S543_MUSAM	STPMMRR
Advanced rehabilitation (14 years)	SECA_HAEDU	LEAEFEK
Advanced rehabilitation (14 years)	CH60_SOLUE	AAVEEGIVPGGGVALLR
Advanced rehabilitation (14 years)	D8QSL1_SELML,D8R1T1_SELML	QLMQEINMLSSLR
Advanced rehabilitation (14 years)	CH602_AZOC5	AAVEEGIVPGGGVALLR
Advanced rehabilitation (14 years)	CH602_AZOC5	LAGGVAVIR
Advanced rehabilitation (14 years)	CH602_AZOC5	VGNEGVITVEEAK
Advanced rehabilitation (14 years)	ATG11_NEUCR	LAPSALRK
Advanced rehabilitation (14 years)	ACTG_PENCH	SYELPDGQVITIGNER
Advanced rehabilitation (14 years)	ACTG_PENCH	VAPEEHPILLTEAPINPK
Advanced rehabilitation (14 years)	CH602_SYNFM	AAVEEGIVPGGGVALLR
Advanced rehabilitation (14 years)	M0STN7_MUSAM	VAPEEHPILLTEAPLNPK
Advanced rehabilitation (14 years)	ACT_SCHDU	VAPEEHPVLLTEAPLNPK
Advanced rehabilitation (14 years)	SYI_CHLTE	SGQKMSK
Advanced rehabilitation (14 years)	KATG_CUPMC	AVAEVYGAADAQEK
Advanced rehabilitation (14 years)	SPC24_ASHGO	AQAAEAMR
Advanced rehabilitation (14 years)	W1PC67_AMBTC	NTFIPPSMK
Advanced rehabilitation (14 years)	MYO1_EMENI	TSSTASAR
Advanced rehabilitation (14 years)	CH601_NITWN	LAGGVAVIR
Advanced rehabilitation (14 years)	CH601_NITWN	VGNEGVITVEEAK
Advanced rehabilitation (14 years)	CH601_POLNA	AAVEEGIVPGGGVALLR
Advanced rehabilitation (14 years)	ACT1_SOYBN	VAPEEHPVLLTEAPLNPK
Advanced rehabilitation (14 years)	TRM6_SCHPO	TREVQYIEEEK
Advanced rehabilitation (14 years)	ISW1_YEAST	LSVNNSQPLTEEEEK
Advanced rehabilitation (14 years)	SYWC_SCHPO	GAFFSHR
Advanced rehabilitation (14 years)	MURC_CUPMC	QAFVEFTQR
Advanced rehabilitation (14 years)	A9T5F8_PHYPA	AVISSLPR
Advanced rehabilitation (14 years)	PDXJ_RHOPA	TSLFIAADPAQIEMAAK
Advanced rehabilitation (14 years)	CH60_CLOB6	LAGGVAVIR
Advanced rehabilitation (14 years)	ADDA_STRP4	EAIGELETK
Advanced rehabilitation (14 years)	CH60_ACICJ	LAGGVAVIR
Advanced rehabilitation (14 years)	CH60_ACICJ	VGNEGVITVEEAK
Advanced rehabilitation (14 years)	CH604_RHILO	LAGGVAVIR
Advanced rehabilitation (14 years)	CH604_RHILO	VGNEGVITVEEAK
Advanced rehabilitation (14 years)	CH60_CUPNH	AAVEEGIVPGGGVALLR
Advanced rehabilitation (14 years)	NOP4_YEAST	NPSLHLSMTR
Advanced rehabilitation (14 years)	ACT_AJECG	SYELPDGQVITIGNER
Advanced rehabilitation (14 years)	ACT_AJECG	VAPEEHPVLLTEAPINPK
Advanced rehabilitation (14 years)	AROC_HAEIN	GVEIGDGFAVVEQR
Advanced rehabilitation (14 years)	CFT1_COCIM	TNAVGINEFAR
Advanced rehabilitation (14 years)	RHAD_LISIN	MTKDILDADFIKEMAK
Advanced rehabilitation (14 years)	CH60_POLNS	AAVEEGIIPGGGVALIR
Advanced rehabilitation (14 years)	CH60_POLNS	LAGGVAVIR
Advanced rehabilitation (14 years)	CH601_RHOPS	AAVEEGIVPGGGVALLR
Advanced rehabilitation (14 years)	CH601_RHOPS	LAGGVAVIR
Advanced rehabilitation (14 years)	CH601_RHOPS	VGNEGVITVEEAK
Advanced rehabilitation (14 years)	RPOB_ALKEH	NGTFVINGTER
Advanced rehabilitation (14 years)	CH60_THIDA	AAVEEGIVPGGGVALLR
Advanced rehabilitation (14 years)	U5CZ71_AMBTC	QVDADSIEQFPQSYDGRK
Advanced rehabilitation (14 years)	M0RX42_MUSAM	IQTMTLSAGAT
Advanced rehabilitation (14 years)	A9SMM0_PHYPA	AGGAAFLAVCR
Advanced rehabilitation (14 years)	CH60_METI4	AAVEEGIVPGGGVALLR
Advanced rehabilitation (14 years)	A9SNZ3_PHYPA	LQHGMGDR
Advanced rehabilitation (14 years)	RL7_BRADU,RL7_BRASO,RL7_RHOP2,RL7_RHOP5,RL7_RHOPB	IVDDLSSLTVLEAAELAK
Advanced rehabilitation (14 years)	ACT_MESVI	SYELPDGQVITIGNER
Advanced rehabilitation (14 years)	ACT_MESVI	VAPEEHPVLLTEAPLNPK
Advanced rehabilitation (14 years)	HLYA_SERMA	GGQTFNK
Advanced rehabilitation (14 years)	ACT1_SCHCO	SYELPDGQVITIGNER
Advanced rehabilitation (14 years)	A9RUC1_PHYPA	LVDFAHVVYDK
Advanced rehabilitation (14 years)	CH60_METI4	AAVEEGIVPGGGVALLR
Advanced rehabilitation (14 years)	CH104_RHILO,CH105_RHILO,CH10_BRUA1,CH10_BRUA2,CH10_BRUAB,CH10_BRUC2,CH10_BRUMB,CH10_BRUME,CH10_BRUSI,CH10_BRUSU	TAGGIIIPDTAK
Advanced rehabilitation (14 years)	M0STN7_MUSAM	VAPEEHPILLTEAPLNPK
Advanced rehabilitation (14 years)	RS2_RALPJ	TLPMYQDALK
Advanced rehabilitation (14 years)	CH60_CUPNH	AAVEEGIVPGGGVALLR
Advanced rehabilitation (14 years)	PRP5_CANGA	TSNSILLCTEVMSR
Advanced rehabilitation (14 years)	T3RE_SALTY	AFASMLVDEINR
Advanced rehabilitation (14 years)	CH102_RHILO	TAGGIIIPDTAK
Advanced rehabilitation (14 years)	CH601_RHOPS	AAVEEGIVPGGGVALLR
Advanced rehabilitation (14 years)	ACTG_PENCH	SYELPDGQVITIGNER
Advanced rehabilitation (14 years)	ACTG_PENCH	VAPEEHPILLTEAPINPK
Advanced rehabilitation (14 years)	DDDW_RUEPO	TLINGTEAAPRDMVLGIAEFGPGHQLRPHR
Advanced rehabilitation (14 years)	SYE_PSEHT	LSWLNGMWIR
Advanced rehabilitation (14 years)	CH101_BRADU	MHFRPLHDR
Advanced rehabilitation (14 years)	CH101_BRADU	TAGGIIIPDTAK
Advanced rehabilitation (14 years)	CH60_SOLUE	AAVEEGIVPGGGVALLR
Advanced rehabilitation (14 years)	CH10_BART1	INGEDLLIMKESDIMGIMG
Advanced rehabilitation (14 years)	CH10_BART1	TAGGIIIPDTAK
Advanced rehabilitation (14 years)	GUAA_CLOCE	EINQYFTVLTNMR
Advanced rehabilitation (14 years)	CH60_HYPNA	AAVEEGIVPGGGVALLR
Advanced rehabilitation (14 years)	ACT_AJECG	SYELPDGQVITIGNER
Advanced rehabilitation (14 years)	ACT_AJECG	VAPEEHPVLLTEAPINPK
Advanced rehabilitation (14 years)	A9TAU1_PHYPA	LGSFSSSFYK
Advanced rehabilitation (14 years)	A9TCC9_PHYPA	LLSNIEAATNLKGMLEER
Advanced rehabilitation (14 years)	A9RFQ9_PHYPA	GTSFVFREREERDTTLLVR
Advanced rehabilitation (14 years)	M0S0V1_MUSAM	QGGMGGRDRERERER
Advanced rehabilitation (14 years)	ACT_MESVI	SYELPDGQVITIGNER
Advanced rehabilitation (14 years)	ACT_MESVI	VAPEEHPVLLTEAPLNPK
Advanced rehabilitation (14 years)	SYS_HELAH	DFTFTPKEHFELAQK
Advanced rehabilitation (14 years)	M0S7F1_MUSAM	AAAQAATITTEPSQADTLQP
Advanced rehabilitation (14 years)	CH60_CUPMC	AAVEEGIVPGGGVALLR
Advanced rehabilitation (14 years)	UNG_XYLF2,UNG_XYLFT	AGAHQGKGWEGFTDHVVDTLNR
Advanced rehabilitation (14 years)	ACT_SCHDU	VAPEEHPVLLTEAPLNPK
Advanced rehabilitation (14 years)	CEF1_SCHPO	MQQIEAYAQQDYAR
Advanced rehabilitation (14 years)	CH602_SYNFM	AAVEEGIVPGGGVALLR
Advanced rehabilitation (14 years)	RL7_BRADU,RL7_BRASO,RL7_RHOP2,RL7_RHOP5,RL7_RHOPB	IVDDLSSLTVLEAAELAK
Advanced rehabilitation (14 years)	DXR_ELUMP	ITIDSATLMNK
Advanced rehabilitation (14 years)	CH60_POLNS	AAVEEGIIPGGGVALIR
Native soil (reference)	A9SEL4_PHYPA	EAQNAGQLKDGSPAVQK
Native soil (reference)	A9SEL4_PHYPA	EREREREK
Native soil (reference)	A9SEL4_PHYPA	VSSERWADTLNR
Native soil (reference)	A9TQ16_PHYPA	EMQTLSHYTR
Native soil (reference)	RS11_CUPMC,RS11_CUPNH,RS11_CUPPJ,RS11_CUPTR	QGNALSWATAGGQGFK
Native soil (reference)	A9S1M9_PHYPA	LEENTSINNSKNR
Native soil (reference)	PEX1_PICPA	GIFEDIFSEVSWK
Native soil (reference)	A9TGG2_PHYPA	ILQTDHIAACQTERK
Native soil (reference)	CH10_PROM1,CH10_PROM4,CH10_PROMA,CH10_PROMM,CH10_PROMT,CH10_SYNPW,CH10_SYNPX,CH10_SYNS9,CH10_SYNSC	TAGGILLPDTAK
Native soil (reference)	D8SBC9_SELML	DREREREQRER
Native soil (reference)	A9TH37_PHYPA	ASSSSPSTITSNLSRSEK
Native soil (reference)	A9TH37_PHYPA	FHHNLVDKMVAR
Native soil (reference)	W1P8C4_AMBTC	EASLSFFVEYLER
Native soil (reference)	ACT_SCHDU	VAPEEHPVLLTEAPLNPK
Native soil (reference)	ACTG_PENCH	SYELPDGQVITIGNER
Native soil (reference)	IF2_SYNJB	TDVQGSAEAIQTALRDLPQEEVQLR
Native soil (reference)	M0TJ98_MUSAM	SVVVENGGFDNSPRK
Native soil (reference)	CH60_METSB	VAAVKAPGFGDR
Native soil (reference)	CH60_METSB	VGNEGVITVEEAK
Native soil (reference)	A9T4E9_PHYPA	GHPGLTTGLLANMRPELVGR
Native soil (reference)	CH603_NITHX	AVAAGMNPMDLKR
Native soil (reference)	CH603_NITHX	VAAVKAPGFGDR
Native soil (reference)	CH60_RHOMR	VAAVKAPGFGDR
Native soil (reference)	W1NGD9_AMBTC	EKERERERERERERER
Native soil (reference)	W1NGD9_AMBTC	SNRDVKDLVQSALLESNTAR
Native soil (reference)	M0SSU3_MUSAM	AVDSKELGPHQDNR
Native soil (reference)	CH601_RHOPS	AVAAGMNPMDLKR
Native soil (reference)	CH601_RHOPS	VAAVKAPGFGDR
Native soil (reference)	CH601_RHOPS	VGNEGVITVEEAK
Native soil (reference)	CH60_HAEPS	AVAAGMNPMDLKR
Native soil (reference)	CH60_HAEPS	VAAVKAPGFGDR
Native soil (reference)	ACT_AJECG	SYELPDGQVITIGNER
Native soil (reference)	M0SV91_MUSAM	ERERERERESRER
Native soil (reference)	M0SV91_MUSAM	ERERERESREREREREREREEK
Native soil (reference)	M0SV91_MUSAM	ESRERERERER
Native soil (reference)	A9TSN9_PHYPA	EREREREK
Native soil (reference)	CH603_BRASB	VGNEGVITVEEAK
Native soil (reference)	D8RKC8_SELML	DRDRERERELRER
Native soil (reference)	D8RKC8_SELML	ELRERERDRDR
Native soil (reference)	ACT1_SCHCO	SYELPDGQVITIGNER
Native soil (reference)	ACT1_SCHCO	VAPEEHPVLLTEAPLNPK
Native soil (reference)	RL10_SERP5	VVEGTPFECLK
Native soil (reference)	CH601_ERYLH	VAAVKAPGFGDR
Native soil (reference)	CH601_ERYLH	VGNEGVITVEEAK
Native soil (reference)	S8E174_9LAMI	ASIHDITTLNLDQTQTTTLNNS
Native soil (reference)	CH60_CELJU	VAAVKAPGFGDR
Native soil (reference)	GUX2_AGABI	YGTGYCDSQCPR
Native soil (reference)	CH602_AZOC5	AVAAGMNPMDLKR
Native soil (reference)	CH602_AZOC5	VAAVKAPGFGDR
Native soil (reference)	CH602_AZOC5	VGNEGVITVEEAK
Native soil (reference)	W1NZW0_AMBTC	LYEIADQMLSK
Native soil (reference)	CH601_NITWN	AVAAGMNPMDLKR
Native soil (reference)	CH601_NITWN	VAAVKAPGFGDR
Native soil (reference)	CH601_NITWN	VGNEGVITVEEAK
Native soil (reference)	D8RBD1_SELML,D8RYA2_SELML	VITDSSREWISSLR
Native soil (reference)	MYO17_ARATH	DTGALREAKDK
Native soil (reference)	KATG_CUPMC	SPAGAHQWKPK
Native soil (reference)	PNP_DESVM	AITAATGASIDIEDSGK
Native soil (reference)	A9SNZ3_PHYPA	DKDRDREKEK
Native soil (reference)	A9SNZ3_PHYPA	DKDRDREKEKEKDR
Native soil (reference)	A9SNZ3_PHYPA	EKERERERERDRDREERERDR
Native soil (reference)	A9SNZ3_PHYPA	EREREREK
Native soil (reference)	A9SNZ3_PHYPA	GRDREKERERDK
Native soil (reference)	A9SNZ3_PHYPA	NIGSLTPMLGDKK
Native soil (reference)	A9SNZ3_PHYPA	SKPKEGDREKDK
Native soil (reference)	A9SNZ3_PHYPA	SLQLDEALIRR
Native soil (reference)	CH60_HYPNA	VGNEGVITVEEAK
Native soil (reference)	A9SNF2_PHYPA	LLFDVKSDEHEWDIK
Native soil (reference)	CH60_BURTH	AAVEEGIVPGGGVALIR
Native soil (reference)	CH60_BURTH	SFGGPTVTKDGVSVAK
Native soil (reference)	PCKA_SHEPW	VEAYLADKDTFVSNLEVGASK
Native soil (reference)	HSLU_CELJU	TEGVDIQFTQDGIR
Native soil (reference)	CH60_POLNS	AAVEEGIIPGGGVALIR
Native soil (reference)	CH60_POLNS	TIVSNAGEDAGVVVNAVQASK
Native soil (reference)	ACT_MESVI	SYELPDGQVITIGNER
Native soil (reference)	ACT_MESVI	VAPEEHPVLLTEAPLNPK
Native soil (reference)	W1PL18_AMBTC	DKERERDREKDRERDR
Native soil (reference)	W1PL18_AMBTC	DREKDRERERER
Native soil (reference)	W1PL18_AMBTC	EKEKEKERERERDR
Native soil (reference)	W1PL18_AMBTC	EKEKERERER
Native soil (reference)	W1PL18_AMBTC	ERDREKDRERDR
Native soil (reference)	W1PL18_AMBTC	ERDREKERERDR
Native soil (reference)	W1PL18_AMBTC	EREREREK
Native soil (reference)	W1PL18_AMBTC	NLVQSTASAGGAAGLAGVAR
Native soil (reference)	W1PL18_AMBTC	VRDKERERDR
Native soil (reference)	M0SFH2_MUSAM	EREREREERERERER
Native soil (reference)	M0SFH2_MUSAM	GLSGNASIEGIMAGSK
Native soil (reference)	CH602_METCA	AAVEEGIVPGGGVALIR
Native soil (reference)	CH602_METCA	NVVLEKSFGAPVVTK
Native soil (reference)	M0SJQ9_MUSAM	TQRERERERERER
Native soil (reference)	CH60_ACICJ	AVAAGMNPMDLKR
Native soil (reference)	CH60_ACICJ	VGNEGVITVEEAK
Native soil (reference)	CH604_RHILO	AVAAGMNPMDLKR
Native soil (reference)	CH604_RHILO	VGNEGVITVEEAK
Native soil (reference)	CH60_CUPNH	SFGGPTVTKDGVSVAK
Native soil (reference)	CH60_CUPMC	SFGGPTVTKDGVSVAK
Native soil (reference)	D8QWM4_SELML	ASAAASATPAGATDDQGVPAAGTVDVVDHPITIGEVR
Native soil (reference)	A9TY44_PHYPA	PGAFSSK
Native soil (reference)	MYO11_ARATH	AGQMAELDAR
Native soil (reference)	A9SEL4_PHYPA	MGKSLSLK
Native soil (reference)	A9SEL4_PHYPA	TAPGFMTGR
Native soil (reference)	CH101_RHIME	GGIIIPDTAK
Native soil (reference)	DEOC_CLONN	ETVGPDMGVK
Native soil (reference)	LONM_NEUCR	TVMKESSAIAYSYAK
Native soil (reference)	SYL_CLOAB	SAALADDK
Native soil (reference)	A9TX31_PHYPA	GLPVGYNGNK
Native soil (reference)	MCM5_SCHPO	AAATGWER
Native soil (reference)	A9SA65_PHYPA	NNAIQGER
Native soil (reference)	MYO9_ARATH	AGQMAELDAR
Native soil (reference)	A9TH37_PHYPA	MIAVSRSR
Native soil (reference)	SYA_LACC3	EIPGADAFK
Native soil (reference)	IF2_GRAFK	DVKGGGGNNQR
Native soil (reference)	A9STD8_PHYPA	ELNPHMK
Native soil (reference)	ACT_SCHDU	VAPEEHPVLLTEAPLNPK
Native soil (reference)	M0TPL8_MUSAM	NPQVMHK
Native soil (reference)	SMC_KORVE	LEEELATNR
Native soil (reference)	W1NDV1_AMBTC	AGQMAELDAR
Native soil (reference)	ACTG_PENCH	SYELPDGQVITIGNER
Native soil (reference)	HIS6_TERTT	DAGDPVEVAK
Native soil (reference)	HIS6_TERTT	WEIFTHGGR
Native soil (reference)	GUX2_AGABI	YGTGYCDSQCPR
Native soil (reference)	A9RFG7_PHYPA	QREREAAAEEREK
Native soil (reference)	RPOB_RHOPB	GLNEQGYK
Native soil (reference)	A9S3L6_PHYPA	AANNTWGK
Native soil (reference)	CH60_METSB	VGNEGVITVEEAK
Native soil (reference)	A9SPE9_PHYPA	NFAGTTLSFGIDGR
Native soil (reference)	A9SPE9_PHYPA	VSGGTMTR
Native soil (reference)	SYR_HELP2	DVVDDVGK
Native soil (reference)	SYR_HELP2	TQGLFDSVVACK
Native soil (reference)	A9SZE0_PHYPA	QHETTAR
Native soil (reference)	M0RGY3_MUSAM	EFLNLMAHK
Native soil (reference)	RPOB_SPICI	SPGAYYK
Native soil (reference)	RL14_FINM2	VADNSGAK
Native soil (reference)	M0SLT2_MUSAM	AGQMAELDAR
Native soil (reference)	SYFA_BORBR,SYFA_BORPE	NFGLDPER
Native soil (reference)	RGYR_THEMA	GVSVIFEEDEEIFESLK
Native soil (reference)	GDE1_ASHGO	NAFKANSR
Native soil (reference)	GDE1_ASHGO	NLSVGPAETYWK
Native soil (reference)	Y3G1_ENCCU	ETAESAKDK
Native soil (reference)	Y3G1_ENCCU	TKEVANSMK
Native soil (reference)	INO80_VANPO	NLLSFHCR
Native soil (reference)	EIF3A_COCIM	DEQDRIR
Native soil (reference)	EIF3A_COCIM	VTEAQAK
Native soil (reference)	DPO3A_HAEIN	NITLLLSK
Native soil (reference)	A9U7D5_PHYPA	SGLAAGQGR
Native soil (reference)	A9U416_PHYPA	ENKDYFK
Native soil (reference)	ACT_ENCCU	VAPEEHPVLLTEAPLNPK
Native soil (reference)	RPOC_SPHAL	VPQTDEK
Native soil (reference)	SECA_JANSC	GSIAEMAQR
Native soil (reference)	CH603_NITHX	AQIEETTSDYDR
Native soil (reference)	PMD1_YEAST	SSPSSISK
Native soil (reference)	PMD1_YEAST	YFSKNGNSK
Native soil (reference)	RLME_BORPE	GDVVVDLGSAPGSWSQVARER
Native soil (reference)	CH601_RHOPS	AQIEETTSDYDR
Native soil (reference)	CH601_RHOPS	VGNEGVITVEEAK
Native soil (reference)	U5D8Y5_AMBTC	LTGGSNGAK
Native soil (reference)	RFC2_YEAST	ALDASNAIDR
Native soil (reference)	RFC2_YEAST	IIDPLASR
Native soil (reference)	PRMC_XANCP	GFAAVATHQDLEQRDR
Native soil (reference)	D8RX45_SELML	VTSSEERR
Native soil (reference)	GCSP_BACFR	VDNTLGDR
Native soil (reference)	LEU1_BRASB	ETVPNSDK
Native soil (reference)	TRXR_ARTBC	MVSSIDR
Native soil (reference)	IF2_ARTAT	GGTQGAFGK
Native soil (reference)	A9SJZ7_PHYPA	SIFCVRDTLSK
Native soil (reference)	MOAA_SYNY3	TLVDSYGR
Native soil (reference)	SYA_SHEAM	GQLLAEGVEFNVADTQK
Native soil (reference)	DNLJ_ROSS1	QLDFDLT
Native soil (reference)	RPOB_NITHX	ALNEHGYK
Native soil (reference)	MYO17_ARATH	AGQMAELDAR
Native soil (reference)	ACT_AJECG	SYELPDGQVITIGNER
Native soil (reference)	M0SV91_MUSAM	ERERERERESR
Native soil (reference)	M0SV91_MUSAM	SYSVLTDR
Native soil (reference)	D8SYL9_SELML	YTPVEQDK
Native soil (reference)	CH603_BRASB	AAVEEGILPGGGVALLR
Native soil (reference)	CH603_BRASB	VGNEGVITVEEAK
Native soil (reference)	A9U6K2_PHYPA	QSVSANSK
Native soil (reference)	ACT1_SCHCO	SYELPDGQVITIGNER
Native soil (reference)	ACT1_SCHCO	VAPEEHPVLLTEAPLNPK
Native soil (reference)	A9SWA0_PHYPA	LPTCVAHG
Native soil (reference)	RF1_HELMI	VPATESSGR
Native soil (reference)	A9TZU7_PHYPA	EQLEASK
Native soil (reference)	MUS81_ARATH	FTPFGYSK
Native soil (reference)	PROA_LEUCK	MVVSVQEIGQR
Native soil (reference)	DDI1_ASPFU,DDI1_NEOFI	SIGGGPSAAAQQNLQR
Native soil (reference)	ESPP_ECO57	GAGVDTR
Native soil (reference)	CH602_AZOC5	AQIEETTSDYDR
Native soil (reference)	CH602_AZOC5	VGNEGVITVEEAK
Native soil (reference)	SYH_RHOPA	FGSVGGGGR
Native soil (reference)	CH601_NITWN	AAVEEGILPGGGVALLR
Native soil (reference)	CH601_NITWN	AQIEETTSDYDR
Native soil (reference)	CH601_NITWN	VGNEGVITVEEAK
Native soil (reference)	CH603_RHIL3	AAVEEGILPGGGVALLR
Native soil (reference)	CH603_RHIL3	AQIEETTSDYDR
Native soil (reference)	SET1_ASPFU	VGNLSAWAWR
Native soil (reference)	D8RKC8_SELML	DRERERERER
Native soil (reference)	A9SNZ3_PHYPA	EGDREKDKEREK
Native soil (reference)	A9SNZ3_PHYPA	EHREKDR
Native soil (reference)	A9S6Y7_PHYPA	KEGEEGK
Native soil (reference)	CH60_HYPNA	VGNEGVITVEEAK
Native soil (reference)	SMC_CHLTE	ASITEQSEK
Native soil (reference)	A9TH04_PHYPA	EGNSSKK
Native soil (reference)	A9TH04_PHYPA	NGYNQGIR
Native soil (reference)	SECA2_STAEQ,SECA2_STAES	NLDLSSER
Native soil (reference)	SLU7_NEUCR	AGPARTK
Native soil (reference)	PURA_FRAAA,PURA_FRASC	GIGPTYGDK
Native soil (reference)	LON_UNCTG	MPDGTLK
Native soil (reference)	RPOC_CAUCR	HKDENGR
Native soil (reference)	W1NVH3_AMBTC	GISSSSK
Native soil (reference)	A9U0L7_PHYPA	EKDFVEQKPAK
Native soil (reference)	A9U0L7_PHYPA	GQVFCARNLK
Native soil (reference)	PALY_USTMA	ATGVADTEK
Native soil (reference)	ACT_MESVI	PGIADRMSK
Native soil (reference)	ACT_MESVI	SYELPDGQVITIGNER
Native soil (reference)	ACT_MESVI	VAPEEHPVLLTEAPLNPK
Native soil (reference)	W1PL18_AMBTC	DRDGERDREKERER
Native soil (reference)	W1PL18_AMBTC	DRDRDRDRDGERDREKERER
Native soil (reference)	W1PL18_AMBTC	DRERERERER
Native soil (reference)	W1PL18_AMBTC	EKERERERDR
Native soil (reference)	W1PL18_AMBTC	ERERDREKEK
Native soil (reference)	W1PL18_AMBTC	YERERDR
Native soil (reference)	CH60_ACICJ	AQIEETTSDYDR
Native soil (reference)	CH60_ACICJ	VGNEGVITVEEAK
Native soil (reference)	CH604_RHILO	VGNEGVITVEEAK
Native soil (reference)	BIOB_KOCRD	NPAELADR
Native soil (reference)	NOT1_YEAST	QTPLQSNA
Native soil (reference)	EFG_LACSS	QASAQGK
Native soil (reference)	M0SDI8_MUSAM	SREIEHSK
Native soil (reference)	M0RYS0_MUSAM	EDLFEGYIAELQK
Native soil (reference)	CH603_BRASB	LAGGVAVIR
Native soil (reference)	CH603_BRASB	SVAAGMNPMDLKR
Native soil (reference)	CH603_BRASB	VGNEGVITVEEAK
Native soil (reference)	U5D8X9_AMBTC	TSPGSAR
Native soil (reference)	RL23_SOLUE	TATFEGK
Native soil (reference)	RL23_SOLUE	VPDFAEI
Native soil (reference)	RPOB_MYCGA	DVGGESAK
Native soil (reference)	CH60_CELJU	LAGGVAVIK
Native soil (reference)	CH60_CELJU	SVAAGMNPMDLKR
Native soil (reference)	RL7_BRADU,RL7_BRASO,RL7_RHOP2,RL7_RHOP5,RL7_RHOPB	AITGLGLK
Native soil (reference)	RL7_BRADU,RL7_BRASO,RL7_RHOP2,RL7_RHOP5,RL7_RHOPB	IVDDLSSLTVLEAAELAK
Native soil (reference)	M0SG80_MUSAM	WTLEACGLLEPR
Native soil (reference)	SM3L2_ARATH	HSATSFK
Native soil (reference)	CH60_HYPNA	AAVEEGIVPGGGVALLR
Native soil (reference)	CH60_HYPNA	LAGGVAVIK
Native soil (reference)	CH60_HYPNA	VGNEGVITVEEAK
Native soil (reference)	CH102_RHILO	MTFRPLHDR
Native soil (reference)	CH102_RHILO	TAGGIIIPDTAK
Native soil (reference)	D8STI3_SELML	SPHYPNELVSCKR
Native soil (reference)	HMW2_MYCPN	QPDPHNNAR
Native soil (reference)	CH602_METCA	LAGGVAVIK
Native soil (reference)	CRYD_NEUCR	VEGFNGK
Native soil (reference)	CEIA_ECOLX	LSDISSNLNR
Native soil (reference)	SYL_MAGSA	LMFDLDGR
Native soil (reference)	CH101_BRADU	TAGGIIIPDTAK
Native soil (reference)	UVRB_CALS8	GDVLEIFPASNTDR
Native soil (reference)	CH60_SOLUE	AAVEEGIVPGGGVALLR
Native soil (reference)	CH60_SOLUE	LAGGVAVIK
Native soil (reference)	SYM_PSYWF	IEQAQIDAMVADSK
Native soil (reference)	RPOB_RHIL3	GSELSNAVVSEYPR
Native soil (reference)	CH603_NITHX	LAGGVAVIR
Native soil (reference)	RNA14_CRYNB	QNPLTEGSANAADVR
Native soil (reference)	W1PBU1_AMBTC	ANPEFSQK
Native soil (reference)	KATG3_MYCS2	VMNLDLFDR
Native soil (reference)	W1PSA4_AMBTC	GAGVTENIFGSR
Native soil (reference)	Q01HU9_ORYSA	HLSAHGGGSGARR
Native soil (reference)	CH602_AZOC5	AAVEEGIVPGGGVALLR
Native soil (reference)	CH602_AZOC5	LAGGVAVIR
Native soil (reference)	CH602_AZOC5	VGNEGVITVEEAK
Native soil (reference)	ACTG_PENCH	SYELPDGQVITIGNER
Native soil (reference)	RS2_BDEBA	ADGKEEAPK
Native soil (reference)	CH60_BURTH	LAGGVAVIK
Native soil (reference)	ACT_SCHDU	VAPEEHPVLLTEAPLNPK
Native soil (reference)	ACT_SCHDU	VAPEEHPVLLTEAPLNPKANR
Native soil (reference)	RPOB_TROWT	VNSFGFIETPYR
Native soil (reference)	CH10_BART1	TAGGIIIPDTAK
Native soil (reference)	M0SQG5_MUSAM	EGERERER
Native soil (reference)	M0SQG5_MUSAM	EGERERERERERER
Native soil (reference)	A9TP65_PHYPA	SVAWESTQATHGGK
Native soil (reference)	SYA_ACIAC	AGELVNFVASQVGGK
Native soil (reference)	SYA_ACIAC	ELCGGTHVAR
Native soil (reference)	ATG11_MAGO7	VNALEGELADGR
Native soil (reference)	LEU1_OLICO	EAPVAAAS
Native soil (reference)	SUB3_ARTBC,SUB3_ARTBE,SUB3_TRIVC	NPGTGTTNR
Native soil (reference)	A9RGS2_PHYPA	TPGASSSGGR
Native soil (reference)	Y1333_NEIMB	AAVAAATNDVENK
Native soil (reference)	ACT1_SOYBN	VAPEEHPVLLTEAPLNPK
Native soil (reference)	CH601_NITWN	LAGGVAVIR
Native soil (reference)	CH601_NITWN	VGNEGVITVEEAK
Native soil (reference)	SPT6_ASHGO	ISMAEAR
Native soil (reference)	SYE_LACGA	SPAAFDQK
Native soil (reference)	CH601_MYCUA	LAGGVAVIK
Native soil (reference)	MDM12_CANGA	KETDTQFLIEFEYK
Native soil (reference)	A9TH37_PHYPA	SPAAGSR
Native soil (reference)	TIM16_YEAST	QGATNASR
Native soil (reference)	DNLJ_BORPE	VASTLPR
Native soil (reference)	CH60_CLOB6	LAGGVAVIR
Native soil (reference)	CH60_ACICJ	LAGGVAVIR
Native soil (reference)	CH60_ACICJ	VGNEGVITVEEAK
Native soil (reference)	W1PU39_AMBTC	AGQYVINEYLQR
Native soil (reference)	CH60_ACIB3	AQIEESTSEYDR
Native soil (reference)	CH60_ACIB3	LAGGVAVIK
Native soil (reference)	A0A118K3I0_CYNCS	LTDGSIMK
Native soil (reference)	ACT1_SCHCO	SYELPDGQVITIGNER
Native soil (reference)	CH604_RHILO	LAGGVAVIR
Native soil (reference)	CH604_RHILO	VGNEGVITVEEAK
Native soil (reference)	M0SJQ9_MUSAM	ERERDVP
Native soil (reference)	CH60_CUPNH	AAVEEGIVPGGGVALLR
Native soil (reference)	CH60_CUPNH	LAGGVAVIK
Native soil (reference)	CH60_CUPMC	AAVEEGIVPGGGVALLR
Native soil (reference)	CH60_CUPMC	LAGGVAVIK
Native soil (reference)	D8RX31_SELML	QSLEEANSK
Native soil (reference)	ACT_AJECG	SYELPDGQVITIGNER
Native soil (reference)	ACT_AJECG	VAPEEHPVLLTEAPINPK
Native soil (reference)	D8T4G5_SELML	IICLQPHEEDSISTDGLR
Native soil (reference)	D8QRE7_SELML,D8RJF5_SELML	EHSPNAR
Native soil (reference)	D8QRE7_SELML,D8RJF5_SELML	LREHSPNAR
Native soil (reference)	ACT_MESVI	SYELPDGQVITIGNER
Native soil (reference)	ACT_MESVI	VAPEEHPVLLTEAPLNPK
Native soil (reference)	ACT_MESVI	VAPEEHPVLLTEAPLNPKANR
Native soil (reference)	CH104_RHILO,CH105_RHILO,CH10_BRUA1,CH10_BRUA2,CH10_BRUAB,CH10_BRUC2,CH10_BRUMB,CH10_BRUME,CH10_BRUSI,CH10_BRUSU	TAGGIIIPDTAK
Native soil (reference)	A9SPA3_PHYPA	QEASEVLAAEQGCQK
Native soil (reference)	CH602_SACEN	LAGGVAVIK
Native soil (reference)	CH60_POLNS	AAVEEGIIPGGGVALIR
Native soil (reference)	CH60_POLNS	LAGGVAVIR
Native soil (reference)	CH601_RHOPS	AAVEEGIVPGGGVALLR
Native soil (reference)	CH601_RHOPS	LAGGVAVIR
Native soil (reference)	CH601_RHOPS	NVVLDKSFGAPR
Native soil (reference)	CH601_RHOPS	VGNEGVITVEEAK
Native soil (reference)	AMPA_ACTSZ	LPLSDEYQEQLK
Native soil (reference)	W1PL18_AMBTC	HLMLMQQSFR
Native soil (reference)	RL7_METNO	AITGLGLK
Native soil (reference)	PPAC_STAA1,PPAC_STAA2,PPAC_STAA3,PPAC_STAA8,PPAC_STAA9,PPAC_STAAB,PPAC_STAAC,PPAC_STAAM,PPAC_STAAN,PPAC_STAAR,PPAC_STAAS,PPAC_STAAT,PPAC_STAAW	AGASTTDK
Native soil (reference)	M0SFH2_MUSAM	EERERERER
Native soil (reference)	SPEE_ALKMQ	HVDMVEIDK
Native soil (reference)	A9TLA9_PHYPA	AAAEGSNQK
Native soil (reference)	HEM1_DESMR	VPTDAHADR
Native soil (reference)	SYF1_MAGO7	GVVDEAADFDLDIR
Native soil (reference)	SYF1_MAGO7	YIDVLNNPR
Native soil (reference)	CH60_THIDA	AAVEEGIVPGGGVALLR
Native soil (reference)	CH60_THIDA	LAGGVAVIK
Native soil (reference)	SYA_CHLL7	GGGGGRAELATAGGK
Native soil (reference)	CH60_METSB	LAGGVAVIR
Native soil (reference)	CH60_METSB	VGNEGVITVEEAK
Native soil (reference)	CH60_EUBE2	LAGGVAVIR
Native soil (reference)	A9SNZ3_PHYPA	SSHGREKDHDTAREK
Native soil (reference)	A0A0A8K930_ANACO	VEAANAISY
Native soil (reference)	W1PFN6_AMBTC	GSQTVLGNAANAR
Native soil (reference)	A9S1X2_PHYPA	DVAGEASR
Native soil (reference)	A0A0D2PQG9_GOSRA	QIRELMQVDGLTNDEVK
