# Supplementary material
Source: MDPI journal article supplement (https://www.mdpi.com/1999-4907/12/9/1158)

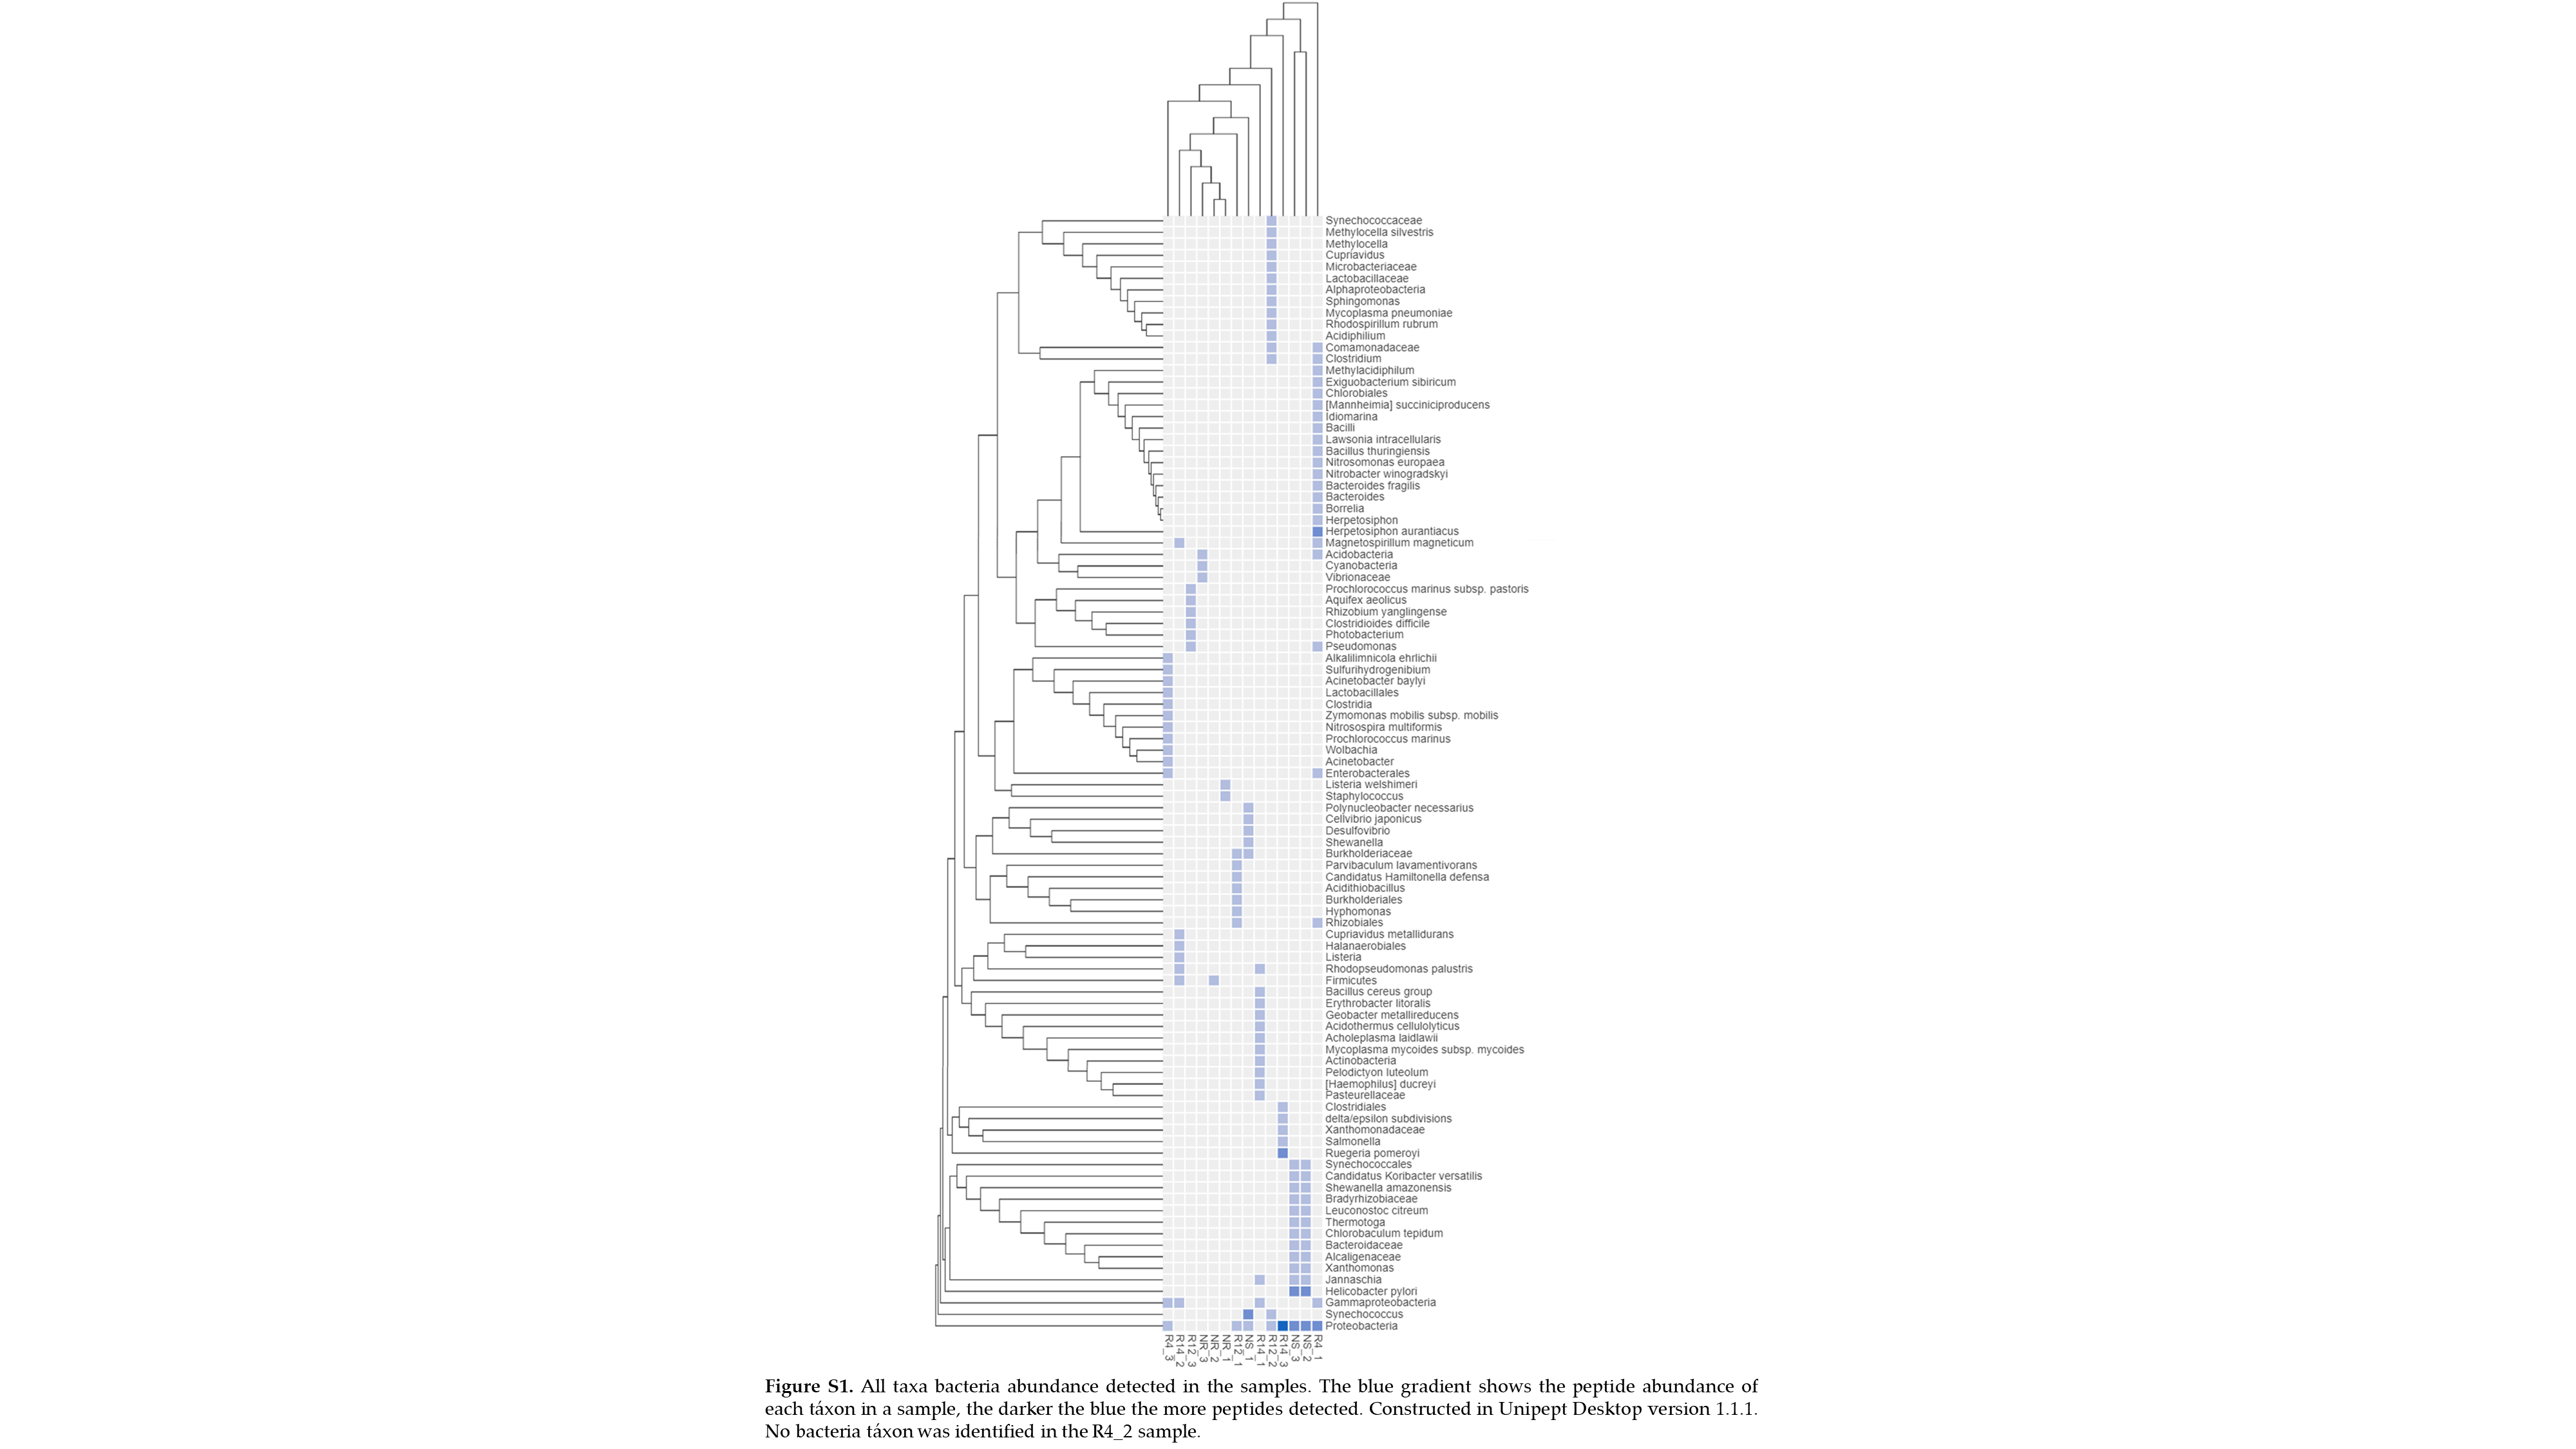

Supplement: s1 [file s1 › Figure S1. Bacteria taxa abundance.tif]

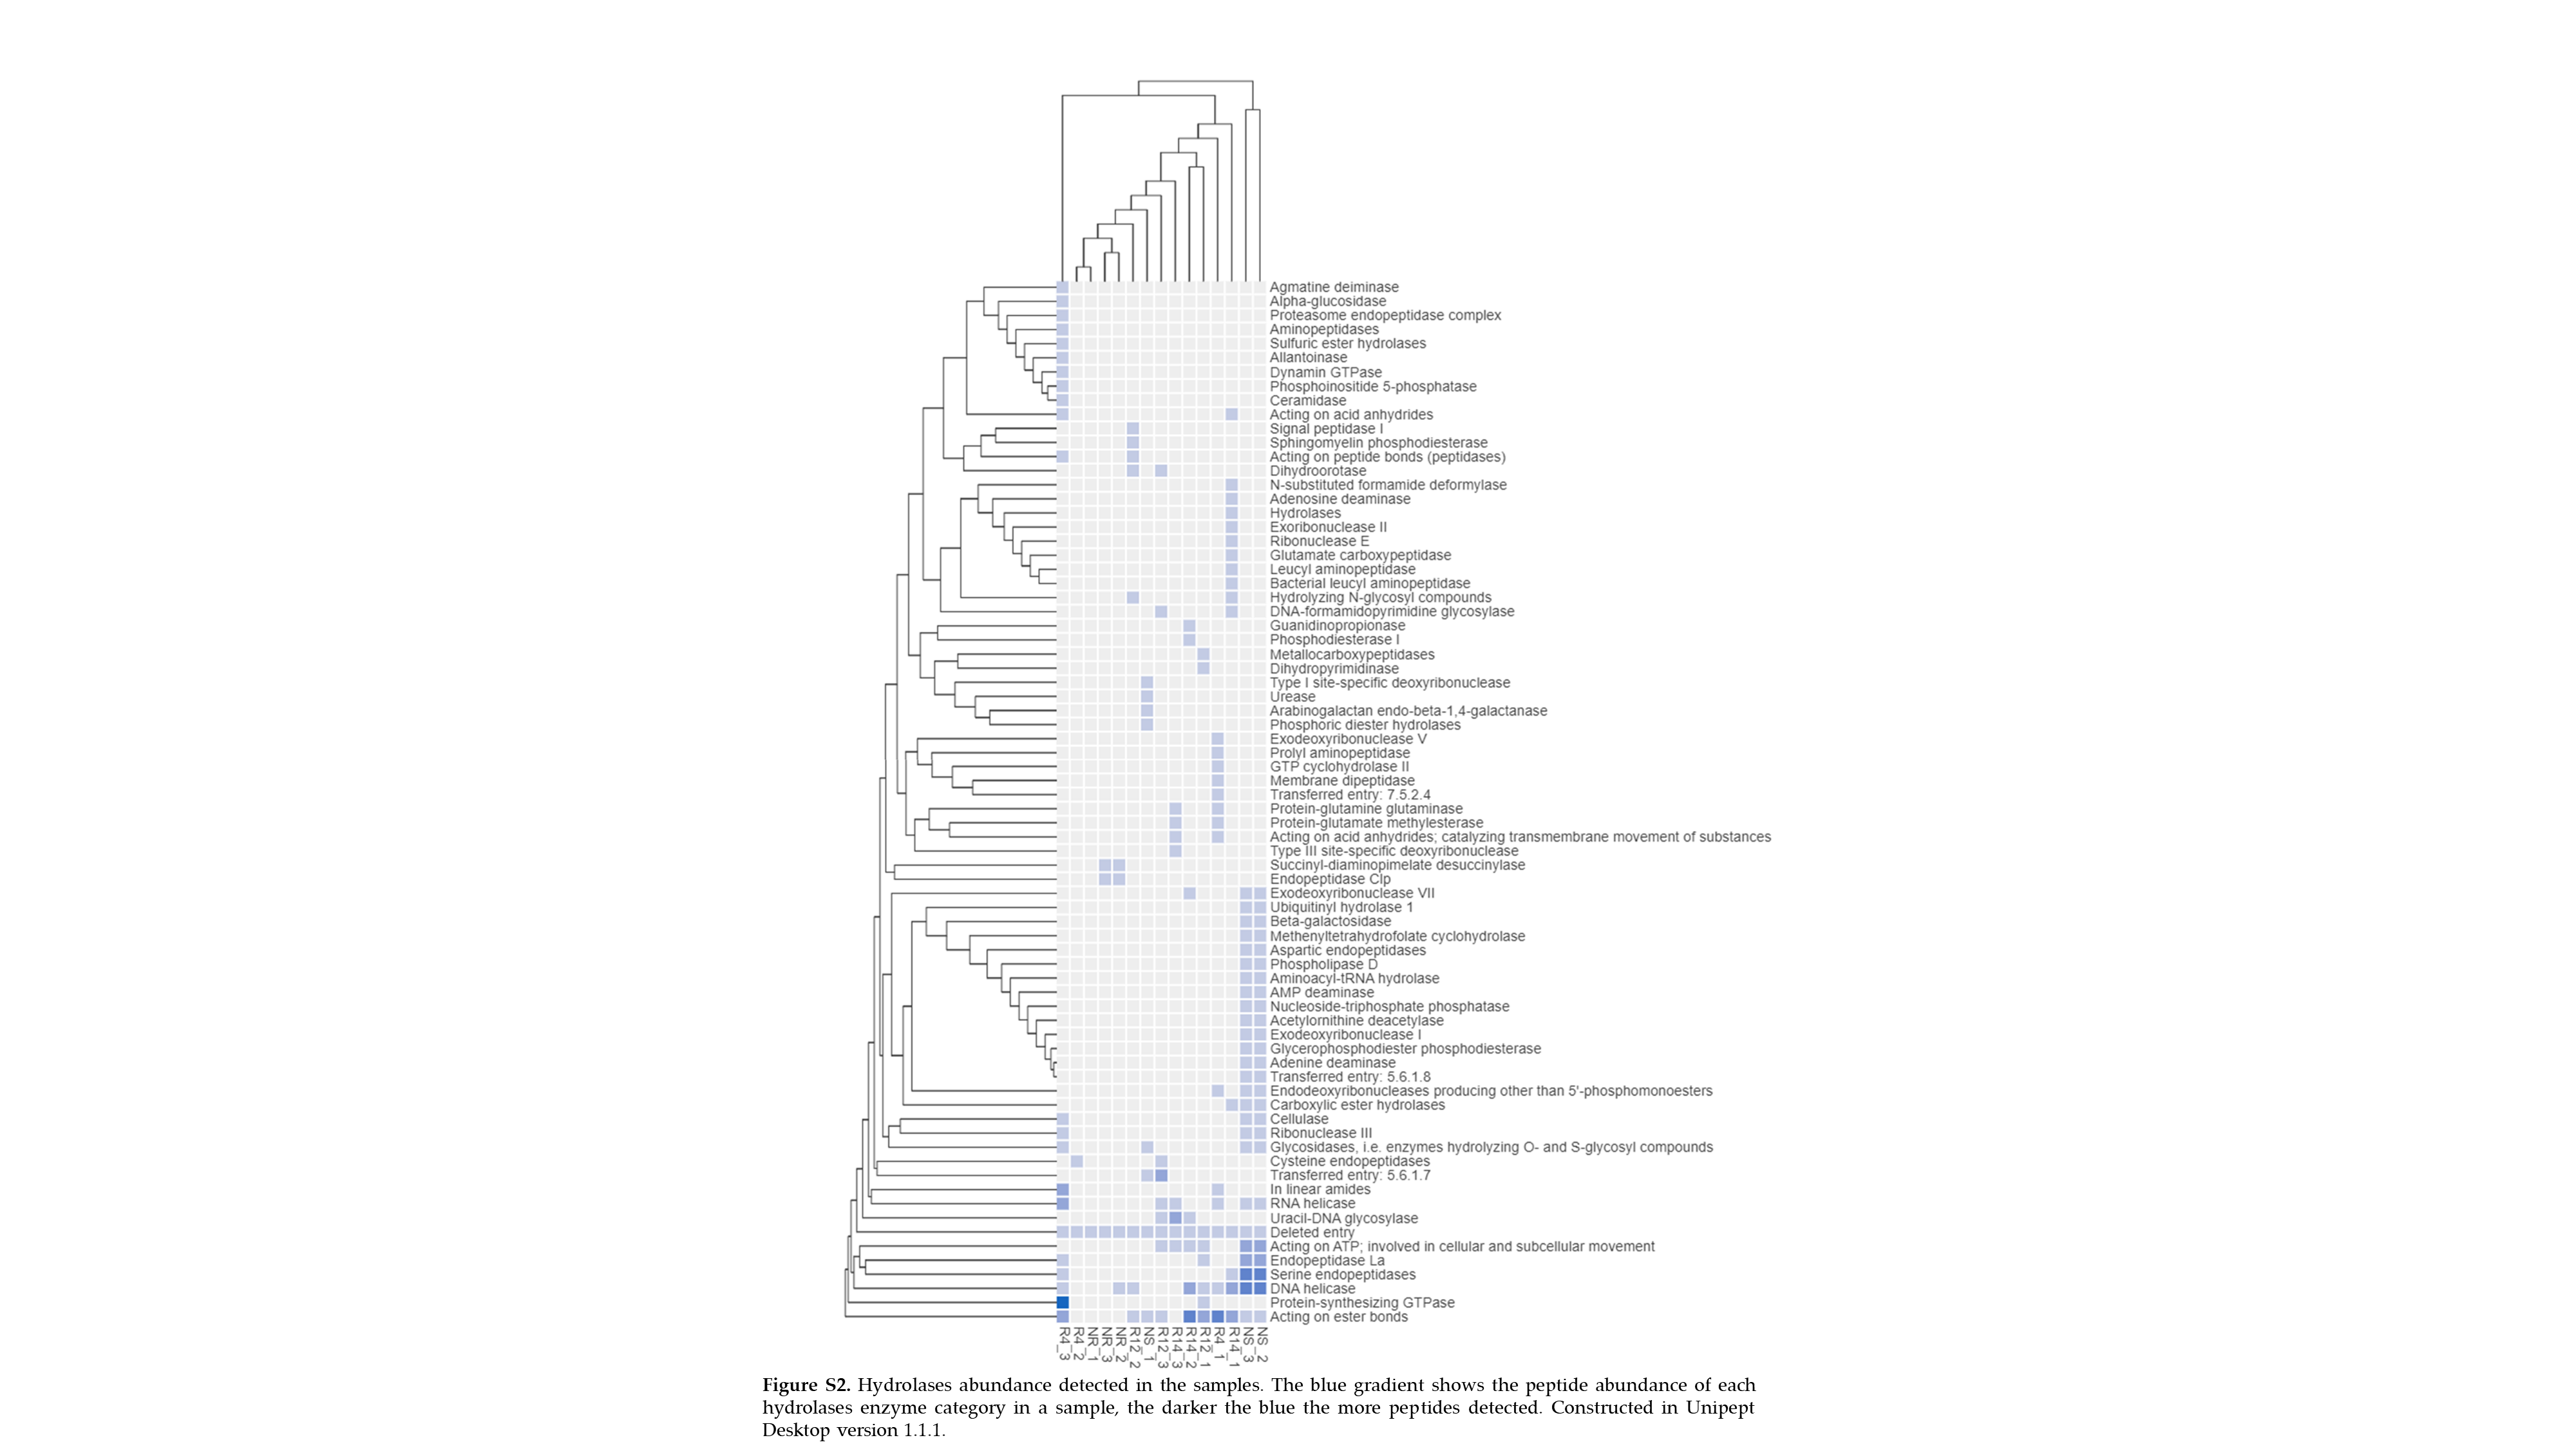

Supplement: s1 [file s1 › Figure S2. Hydrolases enzymes abundance.tif]

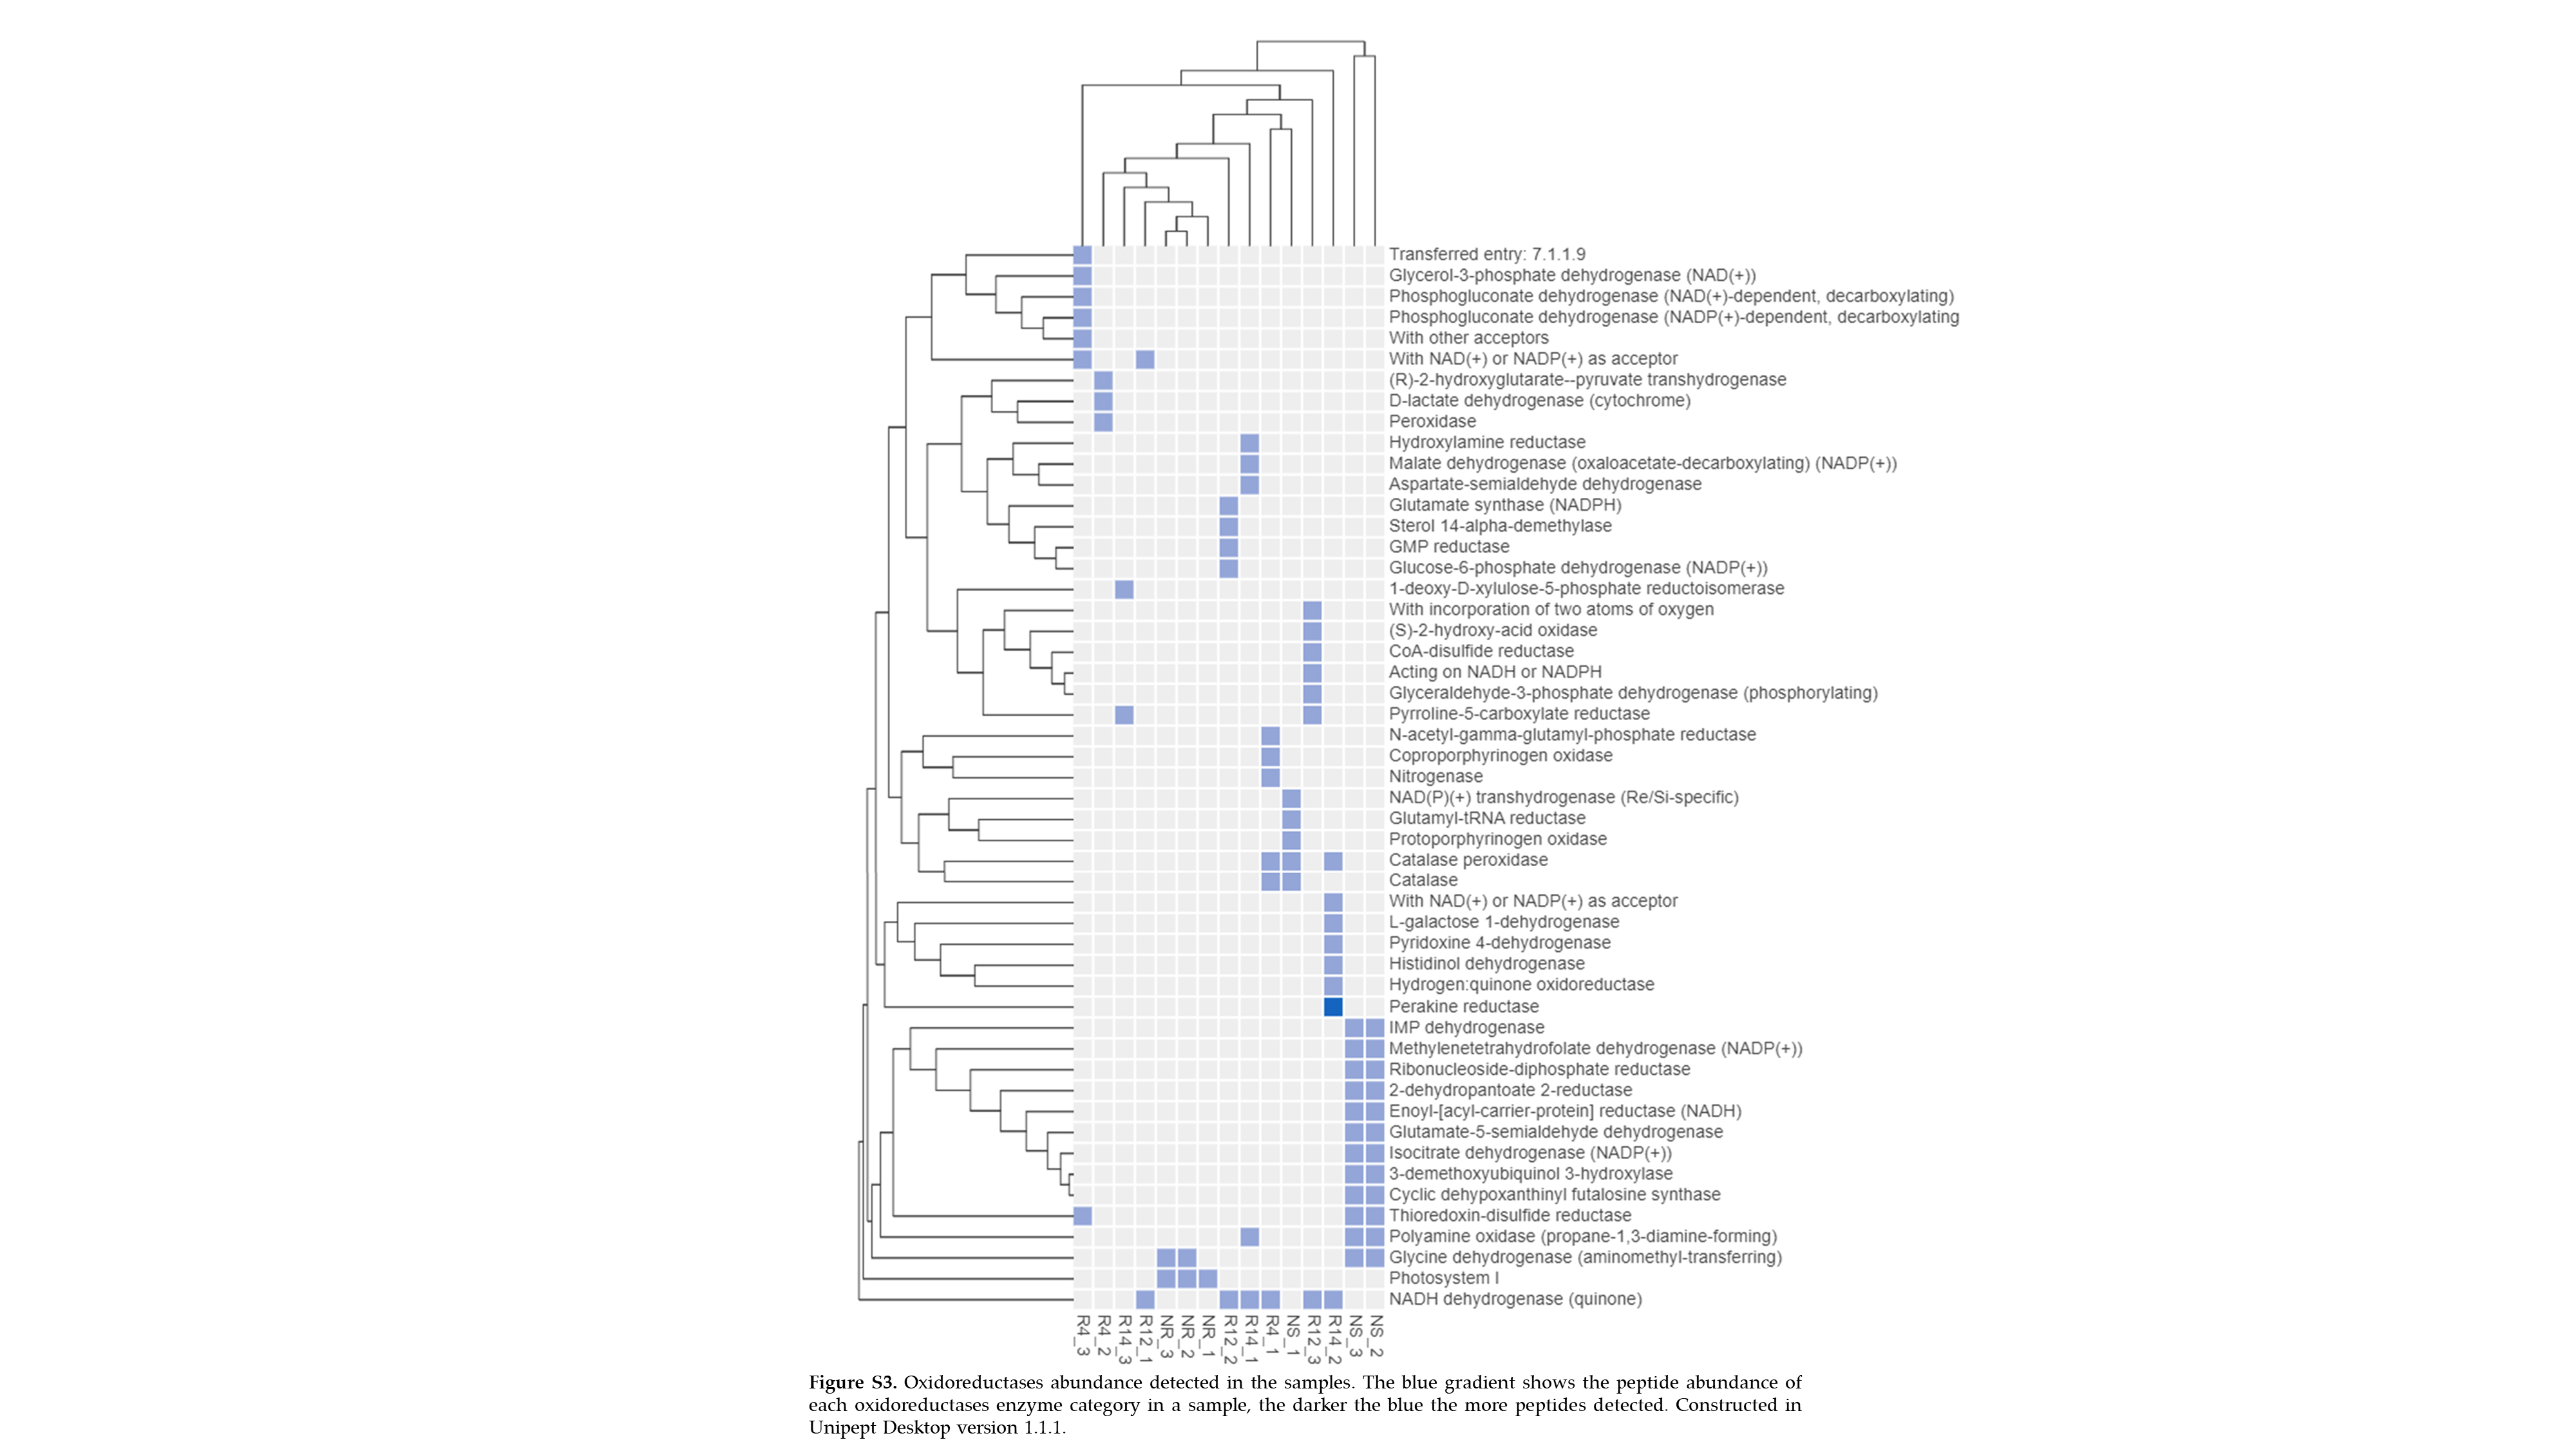

Supplement: s1 [file s1 › Figure S3. Oxidoreductases enzymes abundance.tif]

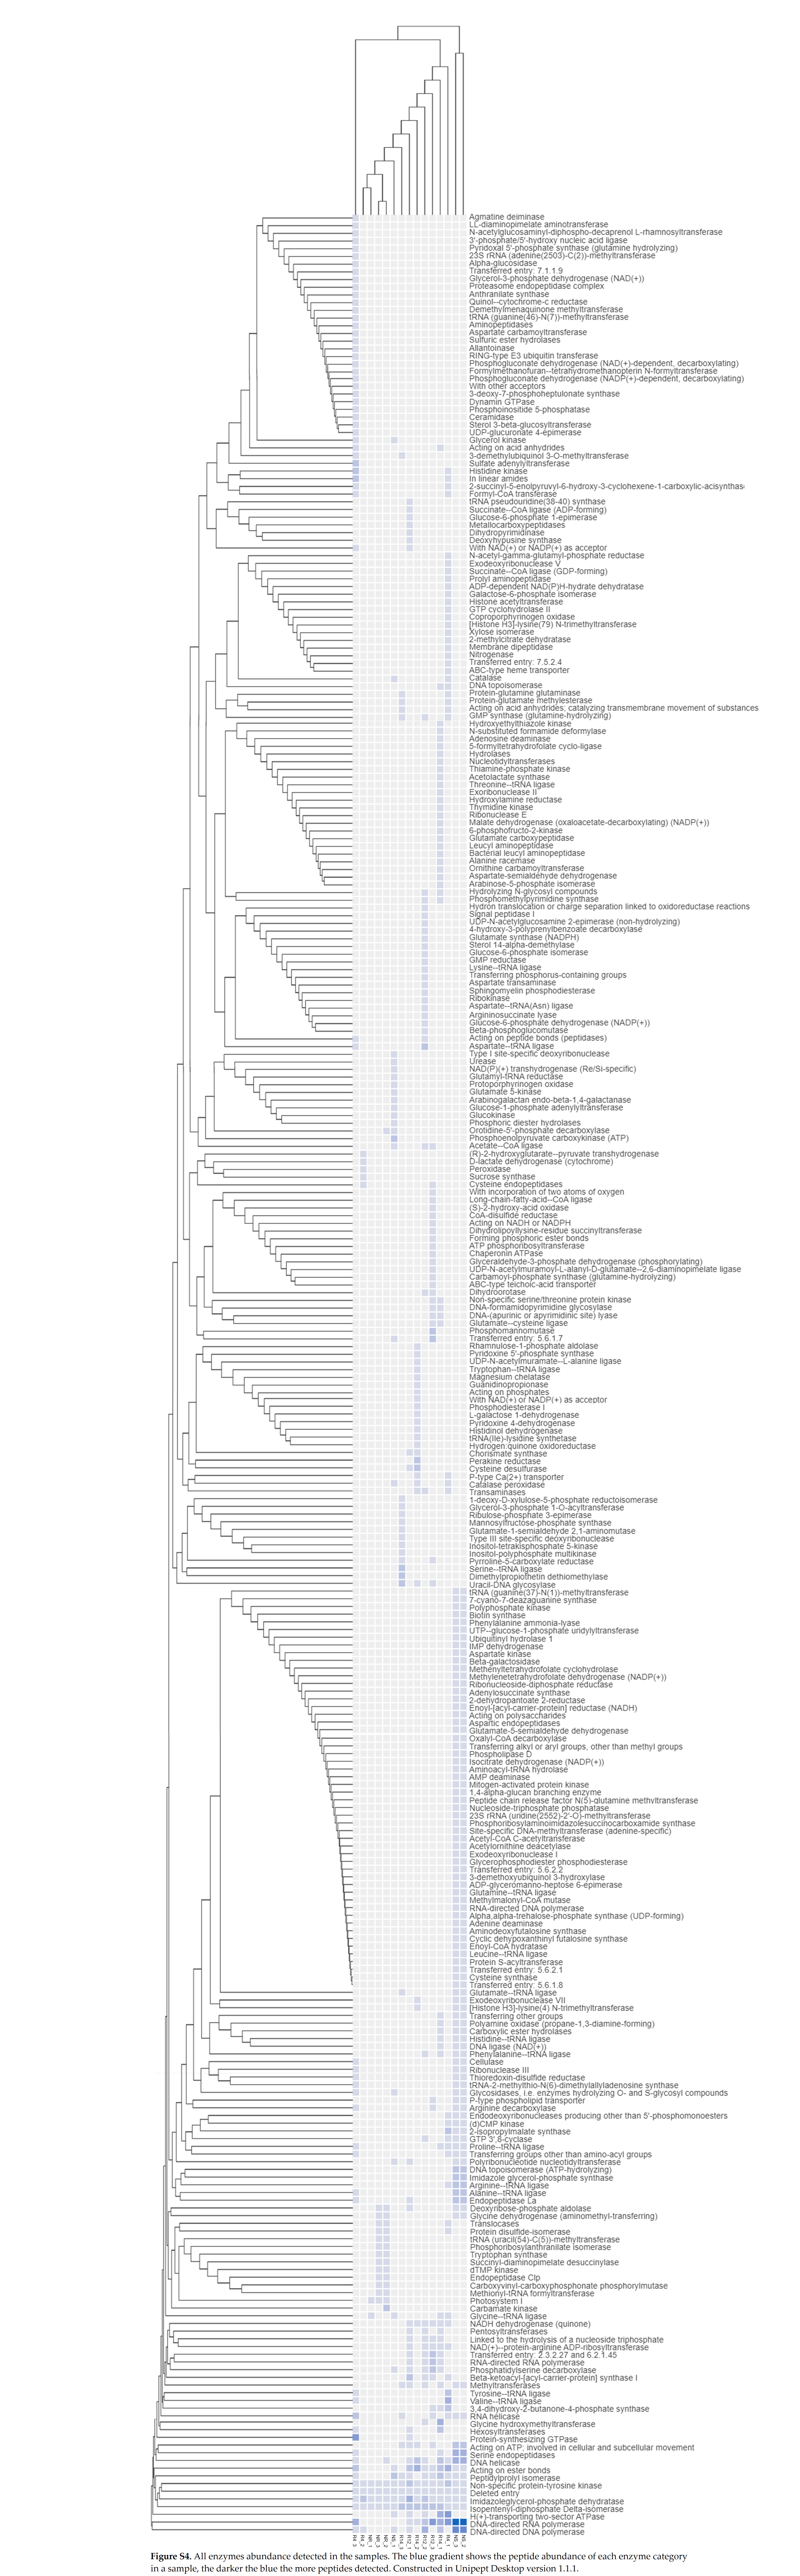

Supplement: s1 [file s1 › Figure S4. All enzymes abundance.png]
